# Supplementary material
Source: PubMed Central journal article supplement (PMC5879470)
Supplement: oc7b00548_si_001.pdf [file oc7b00548_si_001.pdf]

Supporting Information for

**Diverse engineered heme proteins enable stereodivergent cyclopropanation of unactivated alkenes**

Anders M. Knight<sup>1</sup>, S. B. Jennifer Kan<sup>2</sup>, Russell D. Lewis<sup>1</sup>, Oliver F. Brandenburg<sup>2</sup>, Kai Chen<sup>2</sup>,  
Frances H. Arnold<sup>1,2\*</sup>

<sup>1</sup>Division of Biology and Bioengineering and <sup>2</sup>Division of Chemistry and Chemical Engineering,  
California Institute of Technology,  
1200 East California Boulevard, MC 210-41, Pasadena, CA 91125, United States

\*Corresponding author: frances@cheme.caltech.edu

**Table of contents:**

|                                                                                                                                                             |           |
|-------------------------------------------------------------------------------------------------------------------------------------------------------------|-----------|
| <b>Previous literature for stereocomplementary enzymatic cyclopropanation and enantioselective, intermolecular unactivated alkene cyclopropanation.....</b> | <b>02</b> |
| <b>Safety statement.....</b>                                                                                                                                | <b>03</b> |
| <b>Nomenclature for compound labeling.....</b>                                                                                                              | <b>04</b> |
| <b>Materials and methods.....</b>                                                                                                                           | <b>04</b> |
| <b>Protein engineering strategies.....</b>                                                                                                                  | <b>13</b> |
| <b>Protein homology models.....</b>                                                                                                                         | <b>15</b> |
| <b>Cyclopropanation activity and selectivity of whole-cell variants, purified proteins, and cell lysates.....</b>                                           | <b>16</b> |
| <b>Compound synthesis and characterization.....</b>                                                                                                         | <b>19</b> |
| <b>Compound chiral separation conditions and representative traces.....</b>                                                                                 | <b>28</b> |
| <b>Calibration curves for analytical-scale TTN determination.....</b>                                                                                       | <b>37</b> |
| <b>Sequences of primers and variants .....</b>                                                                                                              | <b>42</b> |
| <b>NMR characterization of cyclopropane products.....</b>                                                                                                   | <b>51</b> |
| <b>References.....</b>                                                                                                                                      | <b>73</b> |

**Previous literature for stereocomplementary enzymatic cyclopropanation and enantioselective, intermolecular unactivated alkene cyclopropanation**

**Supplemental Table 1a.** Literature precedent for stereocomplementary cyclopropanation of styrenyl alkenes via carbene transfer. Reference numbers are given for the main text reference numbers.

|                                       | <i>Trans</i> -cyclopropane       |                               | <i>Cis</i> -cyclopropane  |                                   |
|---------------------------------------|----------------------------------|-------------------------------|---------------------------|-----------------------------------|
|                                       | ( <i>R,R</i> )                   | ( <i>S,S</i> )                | ( <i>R,S</i> )            | ( <i>S,R</i> )                    |
| Ref 11,<br>10.1126/science.1231434    | <b>Not reported</b>              | Up to 98% de,<br>96% e.e.     | Up to 84% de,<br>97% e.e. | <b>Not reported</b>               |
| Ref 13,<br>doi/10.1002/cbic.201600528 | Up to 86% de,<br><b>32% e.e.</b> | Up to 98% de,<br>97% e.e.     | Up to 78% de,<br>99% e.e. | Up to <b>42% de</b> ,<br>95% e.e. |
| Ref 17,<br>10.1002/anie.201608680     | Up to 99.9% de,<br>95% e.e.      | Up to 99.9%<br>de, 99.9% e.e. | <b>Not reported</b>       | <b>Not reported</b>               |
| Ref 34,<br>10.1021/jacs.7b00768       | Up to 99.5% de,<br>92% e.e.      | Up to 99.9%<br>de, 99.9% e.e. | <b>Not reported</b>       | <b>Not reported</b>               |

**Supplemental Table 1b.** Current state-of-the-art methods for the enantioselective, intermolecular cyclopropanation of unactivated alkenes. Because iron-catalyzed asymmetric examples are not known, achiral examples are listed for iron.

| Entry | Metal Catalyst | Ref. | Note                                                                                                                                                                                                                                                                                                                                                 |
|-------|----------------|------|------------------------------------------------------------------------------------------------------------------------------------------------------------------------------------------------------------------------------------------------------------------------------------------------------------------------------------------------------|
| 1     | Fe             | 1    | Iron porphyrin-catalyzed, <u>achiral</u> . Two examples involved unactivated alkenes.<br><br>Fe(PFP)Cl (0.02-0.05 mol%) catalyzed the cyclopropanation of 2-ethyl-1-butene (100 eq.) with EDA in 390 TON, d.r. not reported.<br><br>PFP = <i>meso</i> -tetrakis(pentafluorophenyl)porphyrin                                                          |
| 2     | Fe             | 2    | Iron porphyrin-catalyzed, <u>achiral</u> . One example involved unactivated alkenes.<br><br>Fe(TPP)Cl (3 mol%) catalyzed the cyclopropanation of allyl benzene with <i>in situ</i> generated trifluoromethyl diazomethane (1.5 eq.) in water with 3.3 TON, d.r. not reported.<br><br>TPP = 5,10,15,20-tetraphenyl-21 <i>H</i> ,23 <i>H</i> -porphine |
| 3     | Fe             | 3    | Iron porphyrin-catalyzed, <u>achiral</u> . One example involved unactivated alkenes.<br><br>This example is similar to entry 2, but a different <i>in situ</i> method was used to generate the trifluoromethyl diazomethane. No product was detected.                                                                                                |
| 4     | Fe             | 4    | Iron porphyrin-catalyzed, <u>achiral</u> . Three examples involved unactivated alkenes.                                                                                                                                                                                                                                                              |

|    |    |        |                                                                                                                                                                                                                                                                                                                                                                     |
|----|----|--------|---------------------------------------------------------------------------------------------------------------------------------------------------------------------------------------------------------------------------------------------------------------------------------------------------------------------------------------------------------------------|
|    |    |        | Fe(TPP)Cl (10 mol%) catalyzed the cyclopropanation of aliphatic alkenes using <i>in situ</i> generated difluoromethylcarbene (2 eq.) in 6-8 TONs, 7:1 to 13: 1 d.r. ( <i>trans</i> ).                                                                                                                                                                               |
| 5  | Rh | 5-13   | All Rh-carboxylate or Rh-carboxamidate-catalyzed (0.2-2 mol% Rh) examples of unactivated alkene cyclopropanation reported are <b><i>trans</i>-selective</b> .<br><br>The most efficient and selective examples are the cyclopropanation of 1-hexene (72 TTN, >20:1 d.r. ( <i>trans</i> ), 96% e.e.), and 1-octene (70 TTN, >20:1 d.r. ( <i>trans</i> ), 90 % e.e.). |
| 7  | Ir | 14     | Ir-salen (1 mol%) catalyzed the cyclopropanation of >10 unactivated alkenes with up to 93 TTN, 98:2 d.r. ( <i>cis</i> major), 99% e.e..                                                                                                                                                                                                                             |
| 8  | Ir | 15     | Ir(Me)PPIX in engineered myoglobin (0.5 mol%) catalyzed the cyclopropanation of 1-octene in 40 TON, 91:9 er, 40:1 d.r. ( <i>trans</i> major). 6 equivalents of EDA were added <i>via</i> syringe pump over 12 h.                                                                                                                                                    |
| 9  | Ir | 16     | Ir(Me)PPIX in engineered CYP119 enzymes catalyzed the cyclopropanation of a variety of unactivated alkenes (terminal, internal and 1,1-disubstituted) with up to 1300 TON and 99% e.e.. 3 equivalents of EDA were added <i>via</i> syringe pump over 3 h.                                                                                                           |
| 10 | Ru | 17, 18 | Ru-(iminophosphoranyl)ferrocene (2 mol%) catalyzed the cyclopropanation of 3 unactivated alkenes with up to 37 TON, 72:28 d.r. ( <i>cis</i> major), 98% e.e..                                                                                                                                                                                                       |
| 11 | Co | 19, 20 | All Co-catalyzed (1-5 mol% Co) examples of unactivated alkene cyclopropanation reported are <b><i>cis</i>-selective</b> and based on Co-porphyrins.<br><br>The most efficient and selective example is the cyclopropanation of phenylbutene (90 TTN, >99:1 d.r. ( <i>cis</i> ), 96% e.e.).                                                                          |
| 12 | Cu | 21, 22 | All Cu-catalyzed (1 mol% Cu) examples of unactivated alkene cyclopropanation reported are <b><i>trans</i>-selective</b> .<br><br>The most efficient and selective example is the cyclopropanation of 1-octene (80 TTN, 93:7 d.r. ( <i>trans</i> ), 90% e.e.).                                                                                                       |

### Safety statement

No unexpected or unusually high safety hazards were encountered in these methods. While ethyl diazoester (EDA) has well-defined usage and risks, use of more volatile and reactive diazo compounds (e.g. diazoalkanes) should be performed with caution (for example procedures, see reference 23).

## Nomenclature for compound labeling

Alkenyl substrates are named **2x** (where x is a-m). The corresponding cyclopropyl esters (from reaction with ethyl diazoacetate **1**) are named **3x**. Single diastereomer compounds are named *cis-3x* or *trans-3x*. The 1-octene cyclopropane products, whose absolute configuration is known (see *Compound chiral separation conditions and representative traces*), are labeled (**1(R/S)**), **2(R/S)-3a**. Alkenyl substrates with functional groups protected (e.g. 7-octen-1-ol, 7-octen-1-oic acid) are named **2xa**, and their corresponding cyclopropane products are named **3xa**. These are depicted in Supplemental Figure 1.

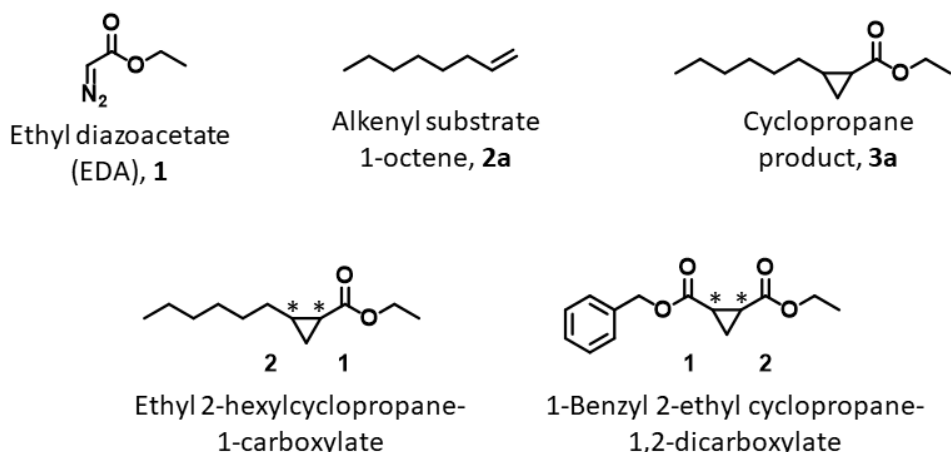

**Supplemental Figure 1.** Compound nomenclature used in this work.

## Materials and Methods

Solvents and reagents were ordered from Sigma Aldrich, TCI, CombiBlocks, or Alfa Aesar and used without further purification. GC-FID data were collected on a Shimadzu GC-17A, Agilent 6850 GC system, and Agilent 7820A GC system. GC-MS data were collected on a Shimadzu GCMS-QP2010 SE. Screening HLPC-UV data were taken on an Agilent 1200 series HPLC. Normal-phase chiral HPLC data were taken on an Agilent 1100 series HPLC. NMR spectra were recorded on a Bruker Prodigy 400 MHz instrument or Varian 300 MHz instrument with  $\text{CDCl}_3$  as solvent.  $^1\text{H}$  NMR spectra were recorded at 400 MHz and  $^{13}\text{C}$  NMR spectra were recorded at 100

MHz. Chemical shifts were normalized to the chloroform solvent's protio impurity ( $^1\text{H}$  NMR 7.26 ppm,  $^{13}\text{C}$  NMR 77.16 ppm). Optical rotation data were collected on a JASCO P-2000 Polarimeter.

### **Proteins tested in enzyme discovery**

Genes encoding eleven heme-binding proteins were ordered as codon-optimized gBlocks (Integrated DNA Technologies, Coralville, Iowa) and assembled into pET22b(+) with the pelB leader sequence removed and a C-terminal 6xHis tag. As the putative distal ligand could interfere with the initially low substrate binding affinities, the proteins were ordered with the distal axial ligands mutated to smaller, nonpolar residues, found to be beneficial for vinylarene cyclopropanation in myoglobin<sup>24</sup>. Some gBlocks (Supplemental Table 2) were also ordered with a mutation in a putative entrance tunnel residue previously found to enhance styrene cyclopropanation activity in myoglobin.<sup>24</sup> These heme proteins were first tested for cyclopropanation activity using 1,7-octadiene and EDA as substrates (1,7-octadiene was chosen for its higher effective concentration of terminal olefin). The most active and selective proteins identified from these experiments, protoglobin from *Aeropyrum pernix* (ApePgb) and nitric oxide dioxygenase from *Rhodothermus marinus* (RmaNOD), were subsequently tested as wild-type proteins against 1-octene **2a**, a commonly used model substrate for unactivated alkene cyclopropanation studies.

**Supplemental Table 2.** Heme-binding proteins tested for unactivated alkene cyclopropanation activity using 1,7-octadiene and EDA as substrates.

| UniProt ID | Organism                              | Annotation                                      | Mutation(s) from WT | Cyclopropane product formation detected |
|------------|---------------------------------------|-------------------------------------------------|---------------------|-----------------------------------------|
| Q3IDI7     | <i>Pseudoalteromonas haloplanktis</i> | Putative hemoglobin-like oxygen-binding protein | Y42V F69A           | No                                      |
| Q7CX73     | <i>Agrobacterium fabrum</i>           | Uncharacterized protein                         | Y26V F53A           | No                                      |
| Q5L1S0     | <i>Geobacillus kaustophilus</i>       | Hypothetical conserved protein                  | Y29V Q50A           | No                                      |
| Q9NPG2     | <i>Homo sapiens</i>                   | Neuroglobin                                     | F28V F61I<br>H64A   | No                                      |
| Q0PB48     | <i>Campylobacter jejuni</i>           | Truncated hemoglobin                            | none                | No                                      |
| B3DVC3     | <i>Methylobacterium inferorum</i>     | Hemoglobin IV                                   | H71V L93A           | Yes                                     |
| D0MGT2     | <i>Rhodothermus marinus</i>           | Nitric oxide dioxygenase                        | Y32V Q52A           | Yes                                     |
| G7VHJ7     | <i>Pyrobaculum ferrireducens</i>      | Protoglobin                                     | Y58V                | Yes                                     |
| Q9YFF4     | <i>Aeropyrum pernix</i>               | Protoglobin                                     | Y60V                | Yes                                     |
| O66586     | <i>Aquifex aeolicus</i>               | Thermoglobin                                    | Y29V Q50A           | Yes                                     |

### Screening previously engineered cytochromes P411

A composite plate of 36 P411-CIS proteins from lineages engineered for non-natural reactions such as aziridination, sulfimidation, amination, and non-styrenyl, activated alkene cyclopropanation<sup>25</sup> was screened for activity and selectivity in **3a** product formation. Most reactions showed trace activity and moderate diastereoselectivity, but the highest activities by a large margin were found in the lineage engineered for *N*-vinyl amide cyclopropanation (O. F. Brandenburg et al., unpublished results). Screening this lineage for stereoselectivity showed that P411-CIS L437F T438Q L75Y L181I, referred to in this study as P411-UA, had the highest activity and enantioselectivity. It was therefore used as a starting point in unactivated alkene cyclopropanation.

## Homology models

ApePgb was modeled with the *Methanosarcina acetivorans* protoglobin (PDB ID: 3ZJL) and RmaNOD was modeled with *Alcaligenes eutrophus* flavohemoglobin (PDB ID: 1CQX) using SWISS-MODEL.<sup>26</sup> A homology model of P411-UA was generated through side-chain mutations to the P411-CIS crystal structure (PDB ID: 4H23). Figures generated from protein homology models and crystal structures were made with PyMOL (Schrödinger, Inc.).

## Subcloning and transformation of genes

Genes for *Aeropyrum pernix* protoglobin (ApePgb) and *Rhodothermus marinus* nitric oxide dioxygenase (RmaNOD) were ordered as codon-optimized gBlocks (Integrated DNA Technologies, Coralville, Iowa). The gBlocks were amplified via polymerase chain reaction (PCR) and the PCR products were gel extracted and purified with Zymoclean Gel DNA Recovery Kit (Zymo Research Corp, Irvine, CA). The PCR product was subcloned into pET22b(+) via Gibson assembly.<sup>27</sup> Gibson assembly products were transformed into electrocompetent *E. coli* EXPRESS BL21(DE3) cells (Lucigen, Middleton, WI) with a Gene Pulser Xcell (Bio-Rad, Hercules, CA). Aliquots of SOC medium (750  $\mu$ L) were added and the cells were incubated at 37°C and 230 rpm for 45 minutes before being plated on LB-ampicillin (100  $\mu$ g mL<sup>-1</sup>) agar plates. Overnight cultures (5 mL LB-amp in culture tubes) were grown at 37°C and 230 rpm for 12-18 hours. Overnight cultures were used to inoculate flask cultures, prepare glycerol stocks, and isolate plasmids. Plasmids were isolated with Qiagen Miniprep kits and the genes were sequence verified (T7 promoter / terminator sequencing primers, Laragen, Inc.).

## Protein expression

Cultures of Hyperbroth (HB, AthenaES) with 100  $\mu$ g mL<sup>-1</sup> ampicillin in unbaffled Erlenmeyer flasks were inoculated 1% (v/v) with stationary-phase overnight cultures and shaken in an Innova 42

shaker at 230 rpm, 37°C. At OD<sub>600</sub> = 0.8, cultures were chilled on ice for 20 minutes. Protein expression was induced with 0.5 mM isopropyl β-D-1-thiogalactopyranoside (IPTG) and heme production was enhanced with supplementation of 1 mM 5-aminolevulinic acid (ALA). The cultures were shaken at 180 rpm and 22°C overnight (18-24 hours). Cells were pelleted via centrifugation at 4000 g for 10 minutes at 4°C. The supernatant was decanted and the cells were resuspended in M9-N buffer supplemented with 25 mM glucose.

### **Site-saturation library construction**

Site-saturation mutagenesis was performed using the 22-codon method.<sup>28</sup> Briefly, oligonucleotides were ordered with NDT, VHG, and TGG codons in the coding strand at the amino acid position to be saturated. A reverse primer complementary to all three forward primers was also ordered. Two PCRs were performed for each library, the first containing a mixture of forward primers (12:9:1 NDT:VHG:TGG) and a pET22b(+) internal reverse primer and the second containing the complementary reverse primer and a pET22b(+) internal forward primer. The two PCR products were gel-purified with Zymoclean Gel DNA Recovery Kit (Zymo Research Corp, Irvine, CA) and ligated together via Gibson assembly. The Gibson assembly product was transformed into electrocompetent *E. coli* EXPRESS BL21(DE3) cells (Lucigen, Middleton, WI). Aliquots of SOC medium (750 μL) were added and the cells were incubated at 37°C for 45 minutes before being plated on LB-ampicillin (100 μg mL<sup>-1</sup>) agar plates.

### **Site-saturation library expression**

Single colonies from the LB-ampicillin agar plates were picked using sterile toothpicks and grown in 300 μL LB-ampicillin in 2 mL 96 deep-well plates at 37°C, 250 rpm, 80% humidity overnight (12-18 hours). Multi-channel pipettes were used to transfer 30 μL of starter culture into deep-well plates containing 1 mL HB-amp per well. Glycerol stocks of these plates were prepared in parallel by adding starter culture (100 μL) and 50% (v/v) sterile glycerol (100 μL) to a 96-well microplate,



which was then stored at  $-80^{\circ}\text{C}$ . The deep-well expression culture plate was incubated at  $37^{\circ}\text{C}$ , 250 rpm, 80% humidity for 2.5 hours. The plate was then chilled on ice for 30 minutes. The cultures were induced with 0.5 mM IPTG and supplemented with 1 mM ALA to increase cellular heme production. The plate was incubated at  $22^{\circ}\text{C}$  and 250 rpm overnight. The plate was centrifuged at  $4000\times g$  for 10 minutes at  $4^{\circ}\text{C}$ .

### Site-saturation library reactions and screening

The pellets in the site-saturation library deep-well plates were resuspended in nitrogen-free M9 minimal medium (47.7 mM  $\text{Na}_2\text{HPO}_4$ , 22.0 mM  $\text{KH}_2\text{PO}_4$ , 8.6 mM NaCl, 2.0 mM  $\text{MgSO}_4$ , and 0.1 mM  $\text{CaCl}_2$ , abbreviated as M9-N, 400  $\mu\text{L}$ ). In an anaerobic chamber, 50  $\mu\text{L}$  reactant mixture in ethanol (final concentrations in a 450  $\mu\text{L}$  reaction: 20 mM EDA **1**, 20 mM 4-phenyl-1-butene **2b**) were added to the reaction plate. The reaction plate was covered with a pierceable foil cover (USA Scientific) and shaken at 500 rpm for 3 hours. To quench the reaction and extract the substrates, 400  $\mu\text{L}$  of a mixture of acetonitrile (49 mL) and 3 M HCl (1 mL) was added to each well. The reaction plate was shaken for an additional 30 minutes, followed by centrifugation ( $4000\times g$ , 10 minutes,  $4^{\circ}\text{C}$ ). The supernatant was filtered through a 0.2  $\mu\text{m}$  PTFE 96-well filter plate into a 96-well microplate ( $4000\times g$ , 1 minute, RT). The microplate was sealed with a pierceable foil cover. The wells were screened for activity and diastereoselectivity of **3b** formation via HPLC using a Kromasil 100-5-C18 column, 4.6x50 mm with a 71% acetonitrile isocratic method (3 minutes). In later screening with higher enzymatic activity, the separation of *cis*- and *trans*-isomers of **3b** was improved with the use of an Eclipse XDB-C18 column, 5  $\mu\text{m}$  particle size, 4.6x150 mm and a 6-minute 71% acetonitrile isocratic method. Wells with improved activity relative to the parent protein were streaked out from the glycerol stock onto LB-amp plates. A single colony was picked and grown in 5 mL LB-amp overnight (230 rpm,  $37^{\circ}\text{C}$ ). These overnight cultures were used in flask protein expression and small-scale biocatalytic reactions to verify enhanced activity and/or selectivity relative to the parent sequence.

### **Sonicated lysate preparation and hemochrome assay**

An aliquot of cells for protein concentration determination was sonicated (QSonica Q500 Sonicator, 1/8 in tip) for 2 minutes, 1 second on, 1 second off at 25% amplitude. Cells expressing ApePgb or RmaNOD variants had 0.1 eq. Bugbuster 10X protein extraction reagent (EMD Millipore) added prior to sonication. The sonicated lysate was clarified via centrifugation at 4500xg and 4°C for 10 minutes. The concentration of heme-loaded protein was determined with the pyridine hemochromagen (hemochrome) assay.<sup>29</sup> Briefly, sonicated and clarified lysate (500 µL) was sterile filtered and added to a cuvette. 500 µL of solution I (0.2 M NaOH, 40% (v/v) pyridine, 500 µM potassium ferricyanide) was added and the spectrum of this oxidized sample was taken from 350-600 nm. Sodium dithionite (10 µL of 0.5 M solution in 0.5 M NaOH) was added and the reduced spectrum was taken from 350-600 nm. The pyridine hemochromagen concentration was determined using its Q bands, with extinction coefficient  $23.98 \text{ mM}^{-1} \text{ cm}^{-1}$  for  $(557 \text{ nm}_{\text{reduced}} - 540 \text{ nm}_{\text{oxidized}})$ .<sup>30</sup>

### **Small-scale, whole-cell biocatalytic reaction preparation and work-up**

Small-scale reactions were set up in 2 mL GC crimp vials. *E. coli* expressing the appropriate heme protein catalyst (380 µL, adjusted to the appropriate optical density or protein concentration) was added to the vials and they were brought into a Coy anaerobic chamber (~ 0-10 ppm O<sub>2</sub>). To each vial was added alkene (final concentration 10 mM) followed by EDA **1** (final concentration 20 mM) with 5% ethanol as a cosolvent. Directly following addition of EDA, the reaction vial was crimped and shaken at 500 rpm at RT. Reactions were worked up by the addition of HCl (16 µL, 3 M stock) and internal standard (16 µL of 40 mM acetophenone in cyclohexane). Cyclohexane (700 µL) was added and the reaction was transferred into 1.7 mL Eppendorf tubes for extraction. The extraction was carried out with a Retsch MM 301 mixing mill (1 minute, 30 Hz / 1800 rpm). Samples were centrifuged at 20000xg for 5 minutes at RT and the organic layer was used for chromatographic analysis.

### Preparative-scale, whole-cell biocatalytic reaction setup and product purification

Whole cells resuspended in M9-N supplemented with 25 mM glucose were brought into a Coy anaerobic chamber. Whole-cell catalyst was added to unbaffled Erlenmeyer flasks, followed by alkene (5 mM, 1.0 eq.) and EDA (10 mM, 2.0 eq.) diluted in ethanol (5% final ethanol cosolvent). The reactions were sealed and shaken at room temperature at 180 rpm for 16 hours. The product was extracted three times from the aqueous reaction mixture with 1 volume eq. of 2:1 pentane:diethyl ether. The organic layer was dried with sodium sulfate and concentrated via rotary evaporation. The concentrated reaction mixture was then purified via flash chromatography (Biotage, Inc.). Pentane:diethyl ether gradients were generally more effective at separating the cyclopropane products from the EDA dimer byproducts. Fractions containing cyclopropanation products were pooled and concentrated *in vacuo*.

**Supplemental Table 3.** Conditions for the preparative-scale reactions reported in the manuscript. **3k** and **3l** were run at higher reaction volume due to the lower molecular weight of the substrates (and corresponding products).

| Product   | Protein variant used | Reaction volume (mL) | Whole-cell OD <sub>600</sub> |
|-----------|----------------------|----------------------|------------------------------|
| <b>3i</b> | ApePgb AGW           | 40                   | 8                            |
| <b>3j</b> | ApePgb AGW           | 40                   | 8                            |
| <b>3k</b> | RmaNOD Q52V          | 80                   | 10                           |
| <b>3l</b> | ApePgb AGW           | 80                   | 10                           |
| <b>3m</b> | ApePgb AGW           | 40                   | 8                            |

### Large-scale protein expression and purification

HB-amp (1 L in 2.8 L unbaffled flask) was inoculated with 1% (v/v) overnight culture and shaken at 37°C, 160 rpm. At OD<sub>600</sub> = 1.3 – 1.5 the flasks were chilled on ice for 20 minutes. Protein expression was then induced with 0.5 mM IPTG and 1 mM ALA and the cultures were grown for

24 hours at 22°C and 140 rpm. The cultures were pelleted (4000×g, 5 minutes, 4°C) and frozen at –20°C. The cells were resuspended in binding buffer (25 mM Tris HCl pH 7.5, 100 mM NaCl, 25 mM imidazole). Hemin (1 mg g<sub>wet cells</sub><sup>-1</sup>) was added to increase heme loading of the protein and DNase I (0.1 mg mL<sup>-1</sup>) was added to reduce lysate viscosity. The cells were sonicated, the lysate was clarified via centrifugation (20,000×g, 20 minutes, 4°C), and the clarified lysate was filtered (0.45 µm sterile filter). The protein was purified via HisTrap (1 mL column) on an ÄktaPurifier (GE Healthcare Life Sciences), using a 25 mM – 300 mM imidazole gradient over 10 column volumes. Fractions containing the protein of interest were pooled and buffer exchanged via centrifugal concentration to a 25 mM Tris HCl pH 7.5, 25 mM NaCl. The buffer-exchanged protein was flash-frozen and stored in 25 µL aliquots at –80°C. The purified protein concentration was determined using the bicinchoninic acid assay (BCA assay, Thermo Scientific) using the standard protocol provided.

### **Small-scale lysate and purified protein reactions**

Small-scale reactions were set up in 2 mL GC crimp vials. Lysate or purified protein was diluted to the desired concentration with M9-N buffer (no glucose added), added to the vials, and brought into a Coy anaerobic chamber (~ 0-10 ppm O<sub>2</sub>). To each vial was added sodium dithionite (final concentration 2 mM), alkene (final concentration 10 mM), and EDA 1 (final concentration 20 mM) with 5% ethanol as a cosolvent. Directly following addition of EDA, the reaction vial was crimped and shaken at 500 rpm at RT. Reactions were worked up by the addition of HCl (16 µL, 3 M stock) and internal standard (16 µL of 40 mM acetophenone in cyclohexane). Cyclohexane (700 µL) was added and the reaction was transferred into 1.7 mL Eppendorf tubes for extraction. The extraction was carried out with a Retsch MM 301 mixing mill (1 minute, 30 Hz / 1800 rpm). Samples were centrifuged at 20000×g for 5 minutes at RT and the organic layer was used for chromatographic analysis.

### **Determination of hemin-catalyzed cyclopropanation activity**

Hemin-catalyzed cyclopropanation reactions were set up as small-scale reactions above; hemin (50  $\mu\text{M}$  final concentration) in M9-N buffer, with or without 1  $\text{mg mL}^{-1}$  bovine serum albumin (BSA), was brought into the Coy anaerobic chamber in 2 mL glass crimp vials. To each vial was added sodium dithionite (final concentration 2 mM), alkene (final concentration 10 mM), and EDA **1** (final concentration 20 mM) with 5% ethanol as a cosolvent. Directly following addition of EDA, the reaction vial was crimped and shaken at 500 rpm at room temperature for 16 hours.

### **Protein engineering strategies**

#### ***Rhodothermus marinus* nitric oxide dioxygenase (RmaNOD):**

**3b** and EDA **1** were used as substrates to engineer RmaNOD for improved activity and selectivity in the production of (**1S**, **2S**)-**3b**. The wild-type gene was mutated at active-site positions Y32 (the putative distal axial ligand), Q52, and V97 using single-site site-saturation mutagenesis. Though modest improvements in activity in the Y32X site-saturation mutagenesis library was observed, the most significant increase in activity from this first round was the Q52V mutation. This mutation also enhanced the diastereo- and enantioselectivity to near-perfect.

#### ***Aeropyrum pernix* protoglobin (ApePgb):**

**3b** and EDA **1** were used as substrates to engineer ApePgb for improved activity and selectivity in the production of (**1R**, **2S**)-**3b**. The wild-type gene underwent site-saturation mutagenesis at position Y60 (the putative distal axial ligand). This yielded the Y60G variant as the most active catalyst. ApePgb Y60G was then subjected to single-site site-saturation mutagenesis at W59, F73, F93, and F145 in parallel, all of which are positions known to modulate the gaseous ligand binding properties of the homologous *Methanosarcina acetivorans* protoglobin.<sup>31</sup> The variant that showed the greatest increase in activity while maintaining high selectivity was W59A Y60G. This

new variant was used to parent the next round of single-site site-saturation mutagenesis at positions F73, F93, and F145. After verification in small-scale biocatalytic reactions, ApePgb W59A Y60G F145W demonstrated a significantly increased in enantioselectivity for the production of (**1R**, **2S**)-**3b**.

**Previously engineered *Bacillus megaterium* variant P411-CIS L437F T438Q L75Y L181I (P411-UA):**

**3b** and EDA **1** were used as substrates to screen P411-UA variants for improved selectivity in the production of (**1S**, **2R**)-**3b**. The engineered P411-UA was first mutated at positions previously mutated in its lineage relative to P411-CIS. A simultaneous NDT double site-saturation mutagenesis library at F437/Q438 and single 22-codon site-saturation mutagenesis libraries<sup>28</sup> at Y75 and I181 were generated and screened for improved diastereoselectivity in the formation of **3b**. In each case P411-UA was among the most active and selective variants. Using P411-UA as parent protein, we next performed single-site site-mutagenesis at additional active site residues V87, I263, E267, and A328, screening for enhanced diastereoselectivity. The most significant changes in diastereoselectivity were in the V87X site-saturation library, in which an enhanced *cis* diastereoselectivity mutation (V87C) and an inversion in stereochemistry (V87F, producing the (**1R**, **2R**)-isomer) were found.

## Protein homology models

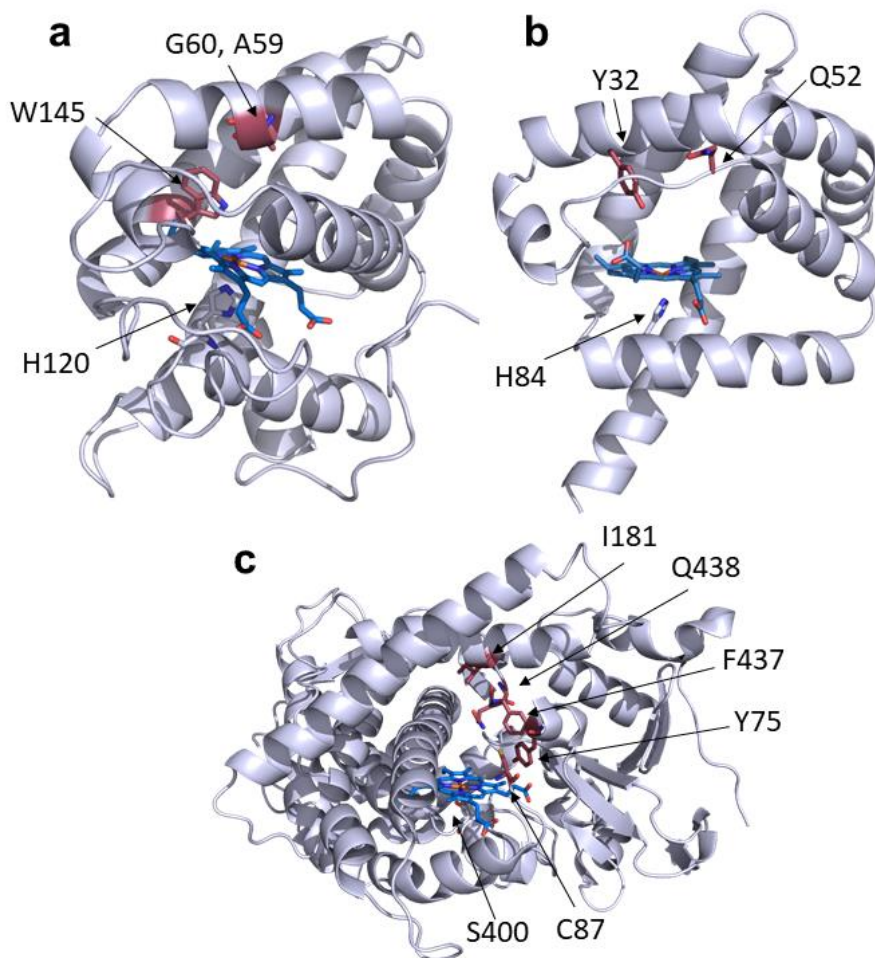

**Supplemental Figure 2.** Homology models of proteins engineered in the study. The protein and proximal ligand are shown in gray. Red indicates residues at which mutations were made for the engineered variants. The heme cofactor is shown in blue. a) ApePgb homology model with W59A, Y60G, and F145W mutations in red. b) RmaNOD homology model with Q52 and the putative distal ligand Y32 (where mutations also enhanced activity) in red. c) P411-UA homology model with V87C in red, as well as other mutated residues 75, 181, 437, and 438 colored.

## Cyclopropanation activity and selectivity of whole-cell variants, purified proteins, and cell lysates

**Supplemental Table 4.** Activity and selectivity of hemin controls, wild-type protein, and engineering lineage intermediate proteins in **3a** product formation. Mean and standard deviation were determined from two biological replicates of technical duplicates. The reactions were performed on analytical scale (10 mM **2a**, direct addition of 20 mM **1**, 16-hour anaerobic reaction). n.d.: not determined. The diastereoselectivity ratio (d.r.) is given as *cis:trans* and the enantiomeric excess (e.e.) is given for the major diastereomer.

| Catalyst         | TTN         | d.r.    | e.e. (major) |
|------------------|-------------|---------|--------------|
| Hemin            | 0.39 ± 0.04 | 25 : 75 | n.d.         |
| Hemin + BSA      | 0.41 ± 0.03 | 23 : 77 | n.d.         |
| RmaNOD WT        | 27 ± 9      | 3 : 97  | 89%          |
| ApePgb WT        | 18 ± 2      | 81 : 19 | 69%          |
| ApePgb Y60G      | 140 ± 40    | 82 : 18 | 96%          |
| ApePgb W59A Y60G | 360 ± 90    | 85 : 15 | 96%          |
| P411-UA          | 500 ± 130   | 89 : 11 | 94%          |

**Supplemental Table 5.** Activity and selectivity of wild-type and engineering lineage intermediate proteins in **3b** product formation. Mean and standard deviation were determined from two biological replicates of technical duplicates. The reactions were performed on analytical scale (10 mM **2b**, direct addition of 20 mM **1**, 16-hour anaerobic reaction). The diastereoselectivity ratio (d.r.) is given as *cis:trans* and the enantiomeric excess (e.e.) is given for the major diastereomer.

| Protein          | TTN        | d.r.    | e.e. (major) |
|------------------|------------|---------|--------------|
| RmaNOD WT        | 34 ± 4     | 17 : 83 | 71%          |
| ApePgb WT        | 85 ± 3     | 88 : 12 | 81%          |
| ApePgb Y60G      | 125 ± 3    | 83 : 17 | 94%          |
| ApePgb W59A Y60G | 570 ± 50   | 80 : 20 | 94%          |
| P411-UA          | 2500 ± 130 | 91 : 9  | >99%         |

The four final protein variants were tested under whole-cell, aerobic conditions at analytical scale (400  $\mu$ L) for their ability to form **3a**. The reactions were set up under the same conditions as the anaerobic analytical-scale reactions, with the exception that they were set up outside of the Coy anaerobic chamber. The aerobic conditions resulted in a nearly complete loss in cyclopropanation for the globins, with only traces of **3a** detected. The formation of EDA dimer was also severely attenuated, suggesting carbene formation was significantly slower under these conditions. The



P411-UA variants had a substantial loss in activity, but were still catalytically active (P411-UA V87C:  $140 \pm 5$  TTN, 95:5 d.r.; P411-UA V87F:  $25 \pm 3$  TTN, 6:94 d.r.). The loss of activity for the globins but not P411s could be due to the globins' high affinity for gaseous ligands like O<sub>2</sub>, CO, and NO<sup>32</sup>, whereas some engineered P411-BM3 variants have previously been shown to function, albeit with attenuated catalytic activity, in aerobic conditions<sup>33</sup>. In addition to being tested as anaerobic and aerobic whole-cell catalysts, the final protein variants were tested as sonicated cell lysates and as purified proteins. In cell lysate the proteins have decreased in activity relative to whole-cell catalysis. The enzymes also had decreased activity as purified proteins. In both lysate and purified protein, the catalysts maintained their stereoselectivity.

**Supplemental Table 6.** Activity and selectivity of final protein variants as whole-cell, sonicated cell lysate, and purified protein for **3a** product formation. The reactions were performed on analytical scale (10 mM **2a**, direct addition of 20 mM **1**, 16-hour anaerobic reaction). Whole-cell catalyst loading was OD<sub>600</sub>= 5 (ApePgb AGW, RmaNOD Q52V) and OD<sub>600</sub>=20 (P411-UA V87C, P411-UA V87F). Cell lysates were diluted to the apparent OD<sub>600</sub>= 5 (ApePgb AGW, RmaNOD Q52V) and OD<sub>600</sub>=20 (P411-UA V87C, P411-UA V87F), corresponding to protein concentrations of 0.9 – 2.1 μM. Catalyst loading in purified protein reactions was 5 μM. The diastereoselectivity ratio (d.r.) is given as *cis:trans*.

| Protein      | Whole cell |          | Cell lysate |          | Purified protein |          |
|--------------|------------|----------|-------------|----------|------------------|----------|
|              | TTN        | d.r.     | TTN         | d.r.     | TTN              | d.r.     |
| RmaNOD Q52V  | 100 ± 6    | < 1 : 99 | 43 ± 2      | < 1 : 99 | 53 ± 9           | < 1 : 99 |
| ApePgb AGW   | 490 ± 20   | 89 : 11  | 190 ± 9     | 89 : 11  | 80 ± 10          | 87 : 13  |
| P411-UA V87C | 270 ± 30   | 95 : 5   | 56 ± 4      | 95 : 5   | 6.9 ± 0.9        | 95 : 5   |
| P411-UA V87F | 310 ± 20   | 4 : 96   | 54 ± 5      | 5 : 95   | 13 ± 2           | 4 : 96   |

Decreased activity in lysate and purified protein relative to whole-cell reactions has been observed in many enzyme-catalyzed carbene transfer reactions<sup>34,35</sup> and is likely due to reduced carbene transfer-based enzyme inactivation in whole cells<sup>36</sup>. Whole cells could also be stabilizing the protein (through proper macromolecular crowding effects, chaperones, etc.). As our focus was on developing a straightforward system for biocatalysis, we opted for whole-cell catalysis that does not require additional catalyst purification steps.

**Supplemental Table 7.** Substrate scope and diastereoselectivity of the four final variants. Activities were confirmed via GC-MS. +: activity against the substrate. \*: trace activity detected. –: no detectable activity. n.d.: not determined. Diastereoselectivity ratio is given as *cis:trans*.

| Alkene, product                            | P411-UA V87C  | ApePgb AGW    | P411-UA V87F  | RmaNOD Q52V   |
|--------------------------------------------|---------------|---------------|---------------|---------------|
| 1-octene ( <b>3a</b> )                     | +, 95:5 d.r.  | +, 89:11 d.r. | +, 4:96 d.r.  | +, <1:99 d.r. |
| 4-phenyl-1-butene ( <b>3b</b> )            | +, 96:4 d.r.  | +, 84:16 d.r. | +, <1:99 d.r. | +, 3:97 d.r.  |
| benzyl acrylate ( <b>3c</b> )              | +, 91:9 d.r.  | +, 71:29 d.r. | +, 2:98 d.r.  | +, <1:99 d.r. |
| 6-bromo-1-hexene ( <b>3d</b> )             | +, 92:8 d.r.  | +, 92:8 d.r.  | +, 4:96 d.r.  | +, <1:99 d.r. |
| vinyl cyclohexane ( <b>3e</b> )            | *             | +, 76:24 d.r. | *             | *             |
| methylenecyclohexane ( <b>3f</b> )         | *             | +             | +             | *             |
| 1-penten-3-one ( <b>3g</b> )               | *             | +, 89:11 d.r. | *             | +, <1:99 d.r. |
| 2-vinylpyridine ( <b>3h</b> )              | *             | *             | *             | +, <1:99 d.r. |
| 7-octen-1-ol ( <b>3i</b> )                 | +             | +, 91:9 d.r.  | *             | *             |
| 7-octen-1-oic acid ( <b>3j</b> )           | n.d.          | +, 83:17 d.r. | n.d.          | n.d.          |
| ( <i>E</i> )-penta-1,3-diene ( <b>3k</b> ) | +, 96:4 d.r.  | +, 91:9 d.r.  | +, 31:69 d.r. | +, 4:96 d.r.  |
| ( <i>Z</i> )-penta-1,3-diene ( <b>3l</b> ) | +, 55:45 d.r. | +, 93:7 d.r.  | +, 35:65 d.r. | +, 35:65 d.r. |
| 5-hexen-2-one ( <b>3m</b> )                | –             | +, 94:6 d.r.  | –             | *             |

**Supplemental Table 8.** GC yields for analytical-scale reactions reported in Figure 2 in the manuscript. These yields are determined by comparing the GC yield to the calibration curves (*Calibration curves for analytical-scale TTN determination*). These reactions were run under the conditions given above (*Small-scale, whole-cell biocatalytic reaction preparation and work-up*). These reactions were run under conditions designed to demonstrate the catalysts' potential TTNs, rather than yields (TTN and stereoselectivity information in main text Figures 2 and 3).

| Alkene, product                    | P411-UA V87C | ApePgb AGW | P411-UA V87F | RmaNOD Q52V |
|------------------------------------|--------------|------------|--------------|-------------|
| 1-octene ( <b>3a</b> )             | 4%           | 8%         | 7%           | 5%          |
| 4-phenyl-1-butene ( <b>3b</b> )    | 26%          | 40%        | 44%          | 4%          |
| benzyl acrylate ( <b>3c</b> )      | 40%          | 91%        | 53%          | 71%         |
| 6-bromo-1-hexene ( <b>3d</b> )     |              | 19%        |              |             |
| vinyl cyclohexane ( <b>3e</b> )    |              | 18%        |              |             |
| methylenecyclohexane ( <b>3f</b> ) |              | 10%        |              |             |
| 1-penten-3-one ( <b>3g</b> )       |              | 41%        |              |             |
| 2-vinylpyridine ( <b>3h</b> )      |              |            |              | 60%         |

## Compound synthesis and characterization

### General procedure A:

Rhodium acetate dimer (10  $\mu\text{mol}$ , 4.4 mg) and a stir bar were added to a 5 mL dram vial and it was sealed with a septum. The sealed vial was purged with three cycles of vacuum and argon. Neat olefin (8 mmol) was added to the vial. EDA (2 mmol) was added in a 2-hour slow addition on ice and reacted overnight at room temperature. The crude reaction mixture was concentrated *in vacuo* and loaded on a SNAP Ultra silica flash cartridge. The reaction mix was separated on an Isolera flash purification system (Biotage, Charlotte, NC) with a hexane/ethyl acetate gradient. Fractions containing the desired product were pooled and concentrated *in vacuo*. Yields were approximately 5-30%, due in part to both significant EDA dimer formation and low conversion of the unactivated alkenes.

### General procedure B:

Rhodium acetate dimer (40  $\mu\text{mol}$ , 17 mg) and a stir bar was added to a scintillation vial and sealed with a septum. The sealed vial was purged with three cycles of vacuum and argon. The vial was charged with alkene (5 mmol) and dichloromethane (5 mL). EDA **1** (2.0 eq. diluted in 4 mL dichloromethane) was added at room temperature by slow addition over 2 hours and reacted overnight at room temperature. The crude reaction mixture was concentrated *in vacuo* and loaded on a SNAP Ultra silica flash cartridge. Using pentane/diethyl ether as eluents, the reaction mix was separated on an Isolera flash purification system (Biotage, Charlotte, NC). Fractions containing the desired product were pooled and concentrated *in vacuo*. Yields of pure fractions were approximately 5-30%, due in part to both significant EDA dimer formation and low conversion of the unactivated alkenes. This method is preferable for more volatile alkenes, and the pentane/diethyl ether gradients appeared to give better separation from the EDA dimer byproducts compared to the hexanes/ethyl acetate gradient.

## Determination of absolute configurations of the cyclopropane products

Absolute configurations of **3a** were confirmed by comparison to literature chiral GC.<sup>15</sup> Cyclosil-B column, 90°C isothermal, absolute configuration of products elute in order: *cis* (**1S, 2R**)–**3a**, (**1R, 2S**)–**3a**, *trans*: (**1R, 2R**)–**3a**, (**1S, 2S**)–**3a**. The absolute configurations of other compounds in this study were not determined, but one could infer them by analogy, assuming the facial selectivity of the diazo reagents and olefins from which these products were made remains the same for each protein variant. The inferred absolute configurations provided here should be used with caution, understanding that substrate effects could have inverted the absolute stereochemistry. The chiral separation conditions for all cyclopropane products are detailed in the section below (*Compound chiral separation conditions and representative traces*), and can be utilized to compare the enzymatic products to an absolute configuration authentic standard in future studies. The optical rotations of some isolated products were collected for additional characterization of their chirality.

### Ethyl 2-hexylcyclopropane-1-carboxylate (**3a**)

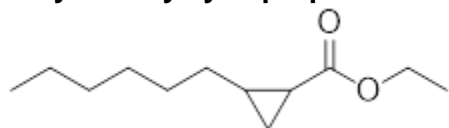

**3a** was synthesized with procedure B from 1-octene **2a** and **1** to give **3a** as a 58:42 mixture of *trans/cis*-isomers. Both *trans*- and *cis*-**3a** are known compounds.<sup>15,16</sup>

*Cis*-**3a**: <sup>1</sup>H NMR (300 MHz, Chloroform-*d*)  $\delta$  4.13 (q,  $J$  = 7.1 Hz, 2H), 1.66 (ddd,  $J$  = 8.9, 7.8, 5.5 Hz, 1H), 1.56 – 1.43 (m, 2H), 1.38 – 1.22 (m, 12H), 1.03 – 0.90 (m, 2H), 0.90 – 0.82 (m, 3H).

*Trans*-**3a**: <sup>1</sup>H NMR (300 MHz, Chloroform-*d*)  $\delta$  4.11 (q,  $J$  = 7.1 Hz, 2H), 1.36 – 1.22 (m, 15H), 1.14 (dt,  $J$  = 8.7, 4.5 Hz, 1H), 0.90 – 0.84 (m, 3H), 0.68 (ddd,  $J$  = 7.9, 6.1, 4.0 Hz, 1H). HR-MS (FAB+): fragment ion, loss of ethoxy group  $[M - \text{CH}_3\text{CH}_2\text{O}]^+$  C<sub>10</sub>H<sub>17</sub>O calculated 153.1279, found 153.127.

### Ethyl 2-phenethylcyclopropane-1-carboxylate (**3b**)

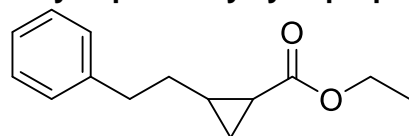

**3b** was synthesized with procedure B from 4-phenyl-1-butene **2b** and **1** to give **3b** as a 57:43 mixture of *trans/cis*-isomers. *Cis-3b* is a known compound.<sup>14</sup>

*Cis-3b*: <sup>1</sup>H NMR (300 MHz, Chloroform-*d*) δ 7.37 – 7.22 (m, 5H), 4.20 (q, *J* = 7.1 Hz, 2H), 2.70 (t, *J* = 7.3 Hz, 2H), 1.93 (tq, *J* = 14.1, 6.7 Hz, 2H), 1.80 – 1.66 (m, 1H), 1.34 (td, *J* = 7.1, 0.7 Hz, 4H), 1.14 – 0.96 (m, 2H). <sup>13</sup>C NMR (75 MHz, Chloroform-*d*) δ 173.2, 142.1, 128.6, 128.4, 125.9, 60.5, 36.0, 29.0, 21.5, 18.4, 14.5, 13.6.

*Trans-3b* <sup>1</sup>H NMR (400 MHz, Chloroform-*d*) δ 7.32 – 7.23 (m, 2H), 7.24 – 7.13 (m, 3H), 4.11 (q, *J* = 7.1 Hz, 2H), 2.72 (t, *J* = 7.7 Hz, 2H), 1.71 – 1.54 (m, 2H), 1.45 – 1.31 (m, 2H), 1.26 (t, *J* = 7.1 Hz, 3H), 1.16 (ddd, *J* = 8.8, 4.8, 4.1 Hz, 1H), 0.69 (ddd, *J* = 8.2, 6.3, 4.1 Hz, 1H). <sup>13</sup>C NMR (101 MHz, Chloroform-*d*) δ 174.5, 141.8, 128.5, 128.5, 126.0, 60.5, 35.6, 35.2, 22.6, 20.4, 15.6, 14.4. HR-MS (FAB+): [M+H]<sup>+</sup> C<sub>14</sub>H<sub>19</sub>O<sub>2</sub>, calculated 219.1385, found 219.1382.

### 1-Benzyl 2-ethyl cyclopropane-1,2-dicarboxylate (**3c**)

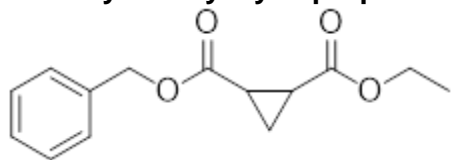

General procedure A only produced trace amounts of the cyclopropane product **3c**. As each final protein variant produced **3c** with high activity, preparative-scale reactions were carried out for each protein. The purified products were confirmed via NMR and used for chiral separation method development and analytical-scale calibration curves.

*Cis-3c* (prepared from P411-UA V87C) <sup>1</sup>H NMR (400 MHz, Chloroform-*d*) δ 7.42 – 7.28 (m, 5H), 5.15 (d, *J* = 12.3 Hz, 1H), 5.10 (d, *J* = 12.3 Hz, 1H), 4.08 (qd, *J* = 7.1, 1.0 Hz, 2H), 2.16 – 1.99 (m, 2H), 1.71 (td, *J* = 6.7, 5.0 Hz, 1H), 1.28 – 1.23 (m, 1H), 1.20 (t, *J* = 7.2 Hz, 3H). <sup>13</sup>C NMR (101 MHz, Chloroform-*d*) δ 169.9, 169.9, 135.9, 128.7, 128.5, 128.4, 67.0, 61.2, 21.9, 21.7, 14.3, 11.9. HR-MS: [M+H]<sup>+</sup> C<sub>14</sub>H<sub>17</sub>O<sub>4</sub>, calculated 249.1127, found 249.1125. *Cis-3c* optical rotation from ApePgb AGW product: [α]<sub>D</sub><sup>22</sup> = –17.0 ° (c 0.1, EtOAc). *Cis-3c* optical rotation from P411-UA V87C product: [α]<sub>D</sub><sup>22</sup> = +9.8 ° (c 0.1, EtOAc).

*Trans-3c* (prepared from P411-UA V87F) <sup>1</sup>H NMR (400 MHz, Chloroform-*d*) δ 7.43 – 7.29 (m, 5H), 5.13 (s, 2H), 4.14 (q, *J* = 7.1 Hz, 2H), 2.27 – 2.15 (m, 2H), 1.46 (ddd, *J* = 8.3, 6.2, 1.8 Hz, 2H), 1.26 (t, *J* = 7.1 Hz, 3H). <sup>13</sup>C NMR (101 MHz, Chloroform-*d*) δ 171.8, 171.8, 135.6, 128.8, 128.5, 128.5, 67.0, 61.3, 22.7, 22.5, 15.7, 14.3. HR-MS : [M+H]<sup>+</sup> C<sub>14</sub>H<sub>17</sub>O<sub>4</sub>, calculated 249.1127, found 249.1123. *Trans-3c* optical rotation from P411-UA V87F product: [α]<sub>D</sub><sup>22</sup> = –124.1 ° (c 0.1, EtOAc).

### Ethyl 2-(4-bromobutyl)cyclopropane-1-carboxylate (**3d**)

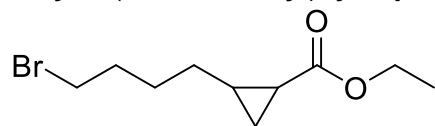

Both *cis*- and *trans*-**3d** are known compounds.<sup>37</sup> **3d** was synthesized with Procedure A from 6-bromo-1-hexene **2d** and EDA **1** to give **3d**. The crude *cis/trans* ratio of this reaction was not determined.

*Cis*-**3d** <sup>1</sup>H NMR (400 MHz, Chloroform-*d*) δ 4.14 (q, *J* = 7.1 Hz, 2H), 3.40 (t, *J* = 6.8 Hz, 2H), 1.93 – 1.80 (m, 2H), 1.74 – 1.38 (m, 4H), 1.56 (s, 1H), 1.33 – 1.15 (m, 4H), 1.02 (td, *J* = 8.0, 4.5 Hz, 1H), 0.92 (ddd, *J* = 7.2, 5.4, 4.5 Hz, 1H). <sup>13</sup>C NMR (101 MHz, Chloroform-*d*) δ 173.1, 60.5, 34.0, 32.6, 28.4, 26.3, 21.7, 18.3, 14.5, 13.5. HR-MS (FAB+): Fragment ion, loss of ethoxy group [M - CH<sub>3</sub>CH<sub>2</sub>O]<sup>+</sup> C<sub>8</sub>H<sub>12</sub><sup>79</sup>BrO, calculated 203.0072, found 203.0026.

**3d** fraction containing 71:29 *trans/cis* diastereomeric mixture, reporting shifts characterized as *trans*-**3d**. <sup>1</sup>H NMR (400 MHz, Chloroform-*d*) δ 4.21 – 4.04 (m, 2H), 3.40 (td, *J* = 6.8, 3.6 Hz, 2H), 1.94 – 1.79 (m, 2H), 1.72 – 1.46 (m, 3H), 1.39 – 1.31 (m, 2H), 1.31 – 1.19 (m, 4H), 1.22 – 1.12 (m, 1H), 0.74 – 0.64 (m, 1H). <sup>13</sup>C NMR (101 MHz, Chloroform-*d*) δ 174.5, 60.5, 33.8, 32.5, 32.3, 27.8, 22.6, 20.3, 15.6, 14.4.

### Ethyl 2-cyclohexylcyclopropane-1-carboxylate (**3e**)

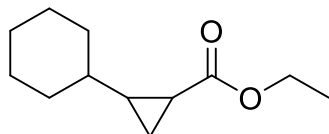

Synthesized with general procedure A from vinylcyclohexane **2e** and EDA **1** to give **3e**. The crude *trans/cis* ratio of this reaction was not determined. *Cis*-**3e** is a known compound.<sup>14</sup>

*Cis*-**3e**: <sup>1</sup>H NMR (300 MHz, Chloroform-*d*) δ 4.18 – 4.04 (m, 1H), 1.85 – 1.51 (m, 6H), 1.29 – 0.92 (m, 2H). <sup>13</sup>C NMR (75 MHz, Chloroform-*d*) δ 173.2, 60.2, 35.8, 33.3, 33.2, 28.6, 26.4, 26.1, 25.9, 17.9, 14.4, 12.5. HR-MS (FAB+): [M]<sup>+</sup> C<sub>12</sub>H<sub>20</sub>O<sub>2</sub>, calculated 196.1463, found 196.1464.

### Ethyl spiro[2.5]octane-1-carboxylate (**3f**)

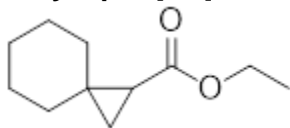

Synthesized with general procedure A from methylenecyclohexane **2f** and EDA **1**. **3f** is a known compound.<sup>38</sup>

<sup>1</sup>H NMR (400 MHz, Chloroform-*d*) δ 4.11 (qd, *J* = 7.1, 1.0 Hz, 2H), 1.62 – 1.27 (m, 11H), 1.24 (t, *J* = 7.1 Hz, 3H), 1.06 (dd, *J* = 5.4, 4.3 Hz, 1H), 0.79 (dd, *J* = 7.8, 4.3 Hz, 1H). <sup>13</sup>C NMR (101 MHz, Chloroform-*d*) δ 173.1, 60.2, 37.4, 30.7, 28.8, 26.2 (2 overlapping carbons), 25.7, 25.7, 20.6, 14.4. HR-MS (FAB+): [M]<sup>+</sup> C<sub>11</sub>H<sub>18</sub>O<sub>2</sub>, calculated 182.1307, found 182.1282

### Ethyl 2-propionylcyclopropane-1-carboxylate (**3g**)

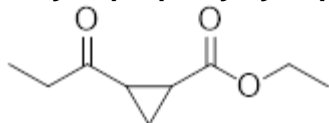

Running general procedure B with 1-penten-3-one **2h** produced no detectable cyclopropane product **3g**; the primary products were diethyl fumarate, diethyl maleate, and an apparent 1,3-dipolar [2+3] cycloaddition product (ethyl 3-propionyl-4,5-dihydro-1*H*-pyrazole-5-carboxylate). *Trans*-**3g** was synthesized on a 5 mmol scale with a racemic strategy adapted from the chiral synthesis previously reported.<sup>39</sup> Co(II) tetraphenylporphyrin (5 mol%, 168 mg) and 1,1-dimethylaminopyridine (DMAP, 305 mg, 2.5 mmol) were added to a 40 mL scintillation vial with stir bar. The vial was sealed with a septum and placed under an Argon atmosphere. Dichloromethane (18 mL) was added, followed by 1-penten-3-one **2g** (510  $\mu$ L, 5 mmol). EDA **1** (725  $\mu$ L, 6 mmol) was added via syringe pump over 2 hours. The crude reaction mixture was concentrated *in vacuo* and separated via flash chromatography with a SNAP Ultra 25g column using a gradient of 0-20% diethyl ether in pentane. Fractions containing *trans*-**3g** were concentrated *in vacuo* to give the desired product.

*Trans*-**3g** <sup>1</sup>H NMR (400 MHz, Chloroform-*d*)  $\delta$  4.14 (q, *J* = 7.2 Hz, 2H), 2.63 (q, *J* = 7.3 Hz, 2H), 2.49 – 2.39 (m, 1H), 2.21 – 2.11 (m, 1H), 1.45 – 1.35 (m, 2H), 1.27 (t, *J* = 7.1 Hz, 3H), 1.08 (t, *J* = 7.3 Hz, 3H). <sup>13</sup>C NMR (101 MHz, Chloroform-*d*)  $\delta$  208.2, 172.3, 61.2, 37.3, 28.9, 24.1, 17.2, 14.3, 7.8. HR-MS (ESI+): [M+Na]<sup>+</sup> C<sub>9</sub>H<sub>14</sub>O<sub>3</sub>Na, calculated 193.0841 found 193.0819.

*Cis*-**3g** was synthesized based on a modified literature procedure of the methyl ketone analog.<sup>40</sup> 3-Oxabicyclo[3.1.0]hexane-2,4-dione (10 mmol) was added to anhydrous diethyl ether under Argon. Ethylmagnesium bromide (9 mL of 1 M in diethyl ether, diluted from 3 M solution in diethyl ether, 9 mmol) was added dropwise over 20 min at –78°C. The reaction mixture was allowed to warm to room temperature over 2 hours and stirred for 18 hours. The reaction was then quenched with aqueous ammonium chloride and extracted by diethyl ether (4 x 40 mL), dried over sodium sulfate and concentrated *in vacuo*. The crude product was used for the esterification step without further purification. Half of the crude product was dissolved in ethanol (20 mL), thionyl chloride (1 mL) was added, and the reaction proceeded at room temperature for 12 hours. The reaction was then quenched with aqueous sodium bicarbonate and diluted with water, and extracted with diethyl ether. The crude mixture was purified via flash chromatography using a gradient of 0-50% diethyl ether in pentane. Fractions containing *cis*-**3g** were concentrated *in vacuo* to give the desired product.

*Cis*-**3g** <sup>1</sup>H NMR (400 MHz, Chloroform-*d*)  $\delta$  4.20 – 4.04 (m, 2H), 2.69 – 2.47 (m, 2H), 2.22 (ddd, *J* = 9.3, 8.2, 6.7 Hz, 1H), 2.08 (ddd, *J* = 9.2, 8.4, 6.6 Hz, 1H), 1.70 (tdd, *J* = 6.7, 4.7, 0.6 Hz, 1H), 1.23 (t, *J* = 7.2 Hz, 3H), 1.22 – 1.15 (m, 1H), 1.07 (td, *J* = 7.3, 0.5 Hz, 3H). <sup>13</sup>C NMR (101 MHz, Chloroform-*d*)  $\delta$  206.6, 170.1, 61.1, 36.9, 27.9, 23.4, 14.3, 12.2, 7.9.

### Ethyl 2-(pyridin-2-yl)cyclopropane-1-carboxylate (**3h**)

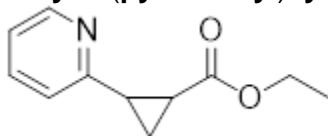

Both *trans*- and *cis*-**3h** are known compounds.<sup>41</sup> *Cis*- and *trans*-**3h** were produced by refluxing 2-vinylpyridine **2h** (10 mmol) with EDA **1** (10 mmol) in toluene (20 mL) overnight. The reaction yielded a 65:35 *trans/cis* mixture of diastereomers. The crude mixture was concentrated *in vacuo* and the product was purified using flash chromatography with a SNAP Ultra 10g Biotage column, 0-100% hexane:EtOAc gradient. Fractions containing pure *trans*-**3h** and *cis*-**3h** were separable

and concentrated *in vacuo* to give the desired products (391.7 mg *trans-3h*, 290.7 mg *cis-3h*, 36% yield).

**Cis-3h:**  $^1\text{H NMR}$  (400 MHz, Chloroform-*d*)  $\delta$  8.49 (ddd,  $J = 4.9, 1.9, 0.9$  Hz, 1H), 7.58 (td,  $J = 7.7, 1.8$  Hz, 1H), 7.32 – 7.22 (m, 1H), 7.10 (ddd,  $J = 7.4, 4.8, 1.1$  Hz, 1H), 3.90 (qd,  $J = 7.2, 1.5$  Hz, 2H), 2.72 (td,  $J = 9.0, 7.6$  Hz, 1H), 2.22 – 2.11 (m, 1H), 1.87 – 1.77 (m, 1H), 1.47 – 1.36 (m, 1H), 1.02 (td,  $J = 7.1, 0.9$  Hz, 3H).  $^{13}\text{C NMR}$  (101 MHz, Chloroform-*d*)  $\delta$  171.1, 156.7, 148.9, 135.9, 123.6, 121.6, 60.3, 27.2, 21.7, 14.0, 11.7.

**Trans-3h**  $^1\text{H NMR}$  (400 MHz, Chloroform-*d*)  $\delta$  8.43 (ddd,  $J = 4.9, 1.9, 1.0$  Hz, 1H), 7.54 (td,  $J = 7.7, 1.8$  Hz, 1H), 7.21 (dt,  $J = 7.8, 1.1$  Hz, 1H), 7.07 (ddd,  $J = 7.5, 4.9, 1.2$  Hz, 1H), 4.15 (q,  $J = 7.2$  Hz, 2H), 2.56 (ddd,  $J = 8.9, 6.1, 3.9$  Hz, 1H), 2.23 (ddd,  $J = 8.4, 5.5, 3.9$  Hz, 1H), 1.59 (dddd,  $J = 13.8, 9.0, 5.8, 3.8$  Hz, 2H), 1.26 (t,  $J = 7.1$  Hz, 3H).  $^{13}\text{C NMR}$  (101 MHz, Chloroform-*d*)  $\delta$  173.4, 158.9, 149.4, 136.0, 122.5, 121.3, 60.7, 27.2, 24.4, 17.3, 14.3. HR-MS (FAB+):  $[\text{M}]^+$   $\text{C}_{11}\text{H}_{13}\text{NO}_2$ , calculated 191.0946, found 191.092.

### Cis Ethyl 2-(6-hydroxyhexyl)cyclopropane-1-carboxylate (*cis-3i*)

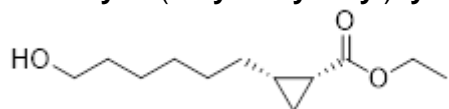

Cyclopropanation of the free alcohol **2i** was performed via preparative-scale enzymatic reaction (ApePgb AGW) to give *cis-3i*.

**cis-3i**  $^1\text{H NMR}$  (400 MHz, Chloroform-*d*)  $\delta$  4.12 (q,  $J = 7.1$  Hz, 2H), 3.62 (t,  $J = 6.6$  Hz, 2H), 1.78 – 1.61 (broad m, 1H), 1.66 (ddd,  $J = 8.9, 7.8, 5.5$  Hz, 1H), 1.60 – 1.43 (m, 4H), 1.41 – 1.29 (m, 6H), 1.26 (t,  $J = 7.1$  Hz, 3H), 1.25 – 1.16 (m, 1H), 1.05 – 0.95 (m, 1H), 0.91 (ddd,  $J = 7.2, 5.5, 4.4$  Hz, 1H).  $^{13}\text{C NMR}$  (101 MHz, Chloroform-*d*)  $\delta$  173.3, 63.1, 60.4, 32.8, 29.7, 29.2, 27.0, 25.8, 22.1, 18.3, 14.5, 13.5. HR-MS (FAB+):  $[\text{M}+\text{H}]^+$   $\text{C}_{12}\text{H}_{23}\text{O}_3$ , calculated 215.1647, found 215.1648.

### Oct-7-en-1-yl 4-nitrobenzoate (**2ia**)

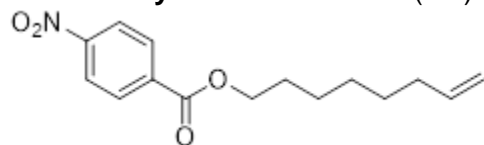

7-Octen-1-ol **2i** (577 mg, 4.5 mmol, 1.0 eq.) and triethylamine (0.82 mL, 1.3 eq.) were dissolved in anhydrous dichloromethane (45 mL). A solution of 4-nitrobenzoyl chloride (944 mg, 1.13 eq.) in anhydrous dichloromethane (5 mL) was added to the reaction. The resulting mixture was stirred at room temperature for 4 hours. The crude reaction mixture was extracted with dichloromethane and washed with brine and concentrated *in vacuo*. The product was purified by flash chromatography with a gradient of 0-8% ethyl acetate in hexane. Fractions containing **2ia** were concentrated *in vacuo* to give the desired product (1.24 g, 99% yield).

### 6-(2-(Ethoxycarbonyl)cyclopropyl)hexyl 4-nitrobenzoate (**3ia**)

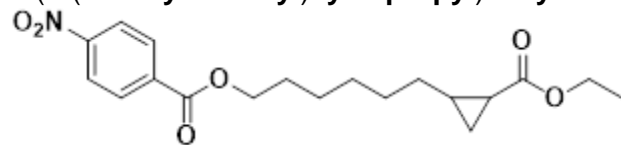



**3ia** standard (racemic mixture) was synthesized as a mixture of *trans/cis*-isomers using general procedure B from **2ia** and EDA **1** and purified via flash chromatography with a gradient of 0-13% ethyl acetate in hexane. Fractions containing *trans-3ia* and *cis-3ia* were separable and concentrated *in vacuo* to give the desired products (approximately 25% yield).

*Cis-3ia* derivatized enzymatic product was prepared by protecting the preparative-scale enzymatic product **3i**. **3i** (~16 mg, ~0.058 mmol, 1.0 eq.), 4-nitrobenzoyl chloride (43 mg, 4.0 eq.), and triethylamine (80  $\mu$ L, ~10.0 eq.) were added to anhydrous dichloromethane and the reaction proceeded at room temperature for 3 hours. The crude reaction mixture was concentrated *in vacuo* and purified by flash chromatography with a gradient of 0-13% ethyl acetate in hexane. Fractions containing *cis-3ia* were concentrated *in vacuo* to give the desired product.

*Cis-3ia*  $^1\text{H}$  NMR (400 MHz, Chloroform-*d*)  $\delta$  8.33 – 8.25 (m, 2H), 8.25 – 8.17 (m, 2H), 4.36 (t,  $J$  = 6.7 Hz, 2H), 4.13 (q,  $J$  = 7.1 Hz, 2H), 1.82 – 1.74 (m, 2H), 1.77 – 1.62 (m, 1H), 1.49 – 1.32 (m, 9H), 1.26 (t,  $J$  = 7.1 Hz, 3H), 1.00 (td,  $J$  = 8.2, 4.5 Hz, 1H), 0.94 – 0.87 (m, 1H).  $^{13}\text{C}$  NMR (101 MHz, Chloroform-*d*)  $\delta$  173.2, 164.9, 150.6, 136.0, 130.8, 123.7, 66.2, 60.4, 29.6, 29.1, 28.7, 27.0, 26.1, 22.0, 18.3, 14.5, 13.6. HR-MS (FAB+):  $[\text{M}+\text{H}]^+$   $\text{C}_{19}\text{H}_{26}\text{NO}_6$  calculated 364.1760, found 364.1775.

### **Cis 6-(2-(ethoxycarbonyl)cyclopropyl)hexanoic acid (*cis-3j*)**

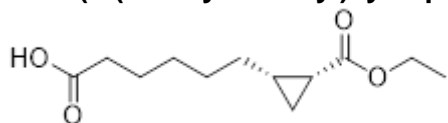

Cyclopropanation of the free carboxylic acid **2j** was performed via preparative-scale enzymatic reaction (ApePgb AGW) to give *cis-3j*.

*Cis-3j*  $^1\text{H}$  NMR (400 MHz, Chloroform-*d*)  $\delta$  12.00 – 9.50 (broad, 1H), 4.13 (q,  $J$  = 7.1 Hz, 2H), 2.38 – 2.29 (m, 2H), 1.71 – 1.58 (m, 3H), 1.58 – 1.40 (m, 2H), 1.40 – 1.30 (m, 4H), 1.29 – 1.16 (m, 1H), 1.26 (t, 3H), 0.99 (td,  $J$  = 8.1, 4.4 Hz, 1H), 0.91 (ddd,  $J$  = 7.2, 5.4, 4.5 Hz, 1H). *Trans-3j* cyclopropane isomers (minor product in *cis-3j*  $^1\text{H}$  NMR): 1.14 (tdd,  $J$  = 7.1, 4.8, 2.5 Hz), 0.68 (ddd,  $J$  = 7.8, 5.9, 4.0 Hz).  $^{13}\text{C}$  NMR (101 MHz, Chloroform-*d*)  $\delta$  179.4, 173.3, 60.4, 34.0, 29.4, 28.8, 26.9, 24.8, 21.9, 18.3, 14.5, 13.5. HR-MS (FAB+):  $[\text{M}+\text{H}]^+$   $\text{C}_{12}\text{H}_{21}\text{O}_4$ , calculated 229.1440, found 229.1448.

### **Benzyl oct-7-enoate (**2ja**)**

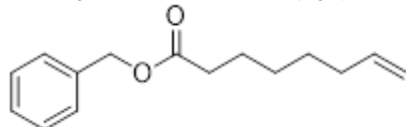

**2ja** was produced by benzyl-protection of 7-octen-1-oic acid **2j**. **2j** (498 mg, 3.5 mmol, 1.0 eq.) and potassium carbonate (967 mg, 2.0 eq.) were added to anhydrous dimethylformamide (20 mL). A solution of benzyl bromide (720 mg, 1.2 eq.) in anhydrous dimethylformamide (4 mL) was added to the reaction slowly over 10 min. The resulting reaction mixture was stirred at room temperature for 20 hours. The crude reaction mixture was extracted with diethyl ether, washed with brine, dried over sodium sulfate, and concentrated *in vacuo*. The product was purified via flash chromatography with hexane:ethyl acetate (20:1) as eluent. Fractions containing **2ja** were concentrated *in vacuo* to give the desired product (805 mg, 99% yield).

### Ethyl 2-(6-(benzyloxy)-6-oxohexyl)cyclopropane-1-carboxylate (**3ja**)

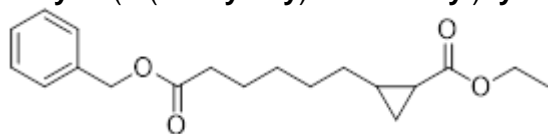

**3ja** racemic standard was synthesized with a modification of general procedure B. **2ja** (100 mg, ~0.43 mmol) and EDA **1** (~5.0 eq) were added to dichloromethane with  $\text{Rh}_2(\text{OAc})_4$  (2 mol%) and the reaction proceeded at room temperature for 20 hours. The crude reaction mixture was concentrated *in vacuo* and purified via flash chromatography with a gradient of 0-20% ethyl acetate in hexane. Fractions containing *trans*-**3ja** and *cis*-**3ja** were separable and concentrated *in vacuo* to give the desired products (<15% yield).

**3ja** derivatized enzymatic product was synthesized from the preparative-scale enzymatic reaction (ApePgb AGW) **3j**. **3j** (15 mg, ~0.065 mmol, 1.0 eq.) and potassium carbonate (27 mg, 3.0 eq.) were added to anhydrous dimethylformamide (2 mL). A solution of benzyl bromide (16  $\mu\text{L}$ , 2.0 eq.) in anhydrous dimethylformamide (0.5 mL) was added to the reaction slowly. The resulting reaction mixture was stirred at room temperature for 20 hours. The crude reaction mixture was extracted with diethyl ether, washed with brine, dried over sodium sulfate, and concentrated *in vacuo*. The product was purified via flash chromatography with hexane:ethyl acetate (10:1) as eluent. Fractions containing **3ja** were concentrated *in vacuo* to give the desired product.

*Cis*-**3ja** from **3j** produced by ApePgb AGW.  $^1\text{H}$  NMR (400 MHz, Chloroform-*d*)  $\delta$  7.35 (s, 3H), 7.41 – 7.27 (m, 2H), 5.11 (s, 2H), 4.17 – 4.06 (m, 2H), 2.35 (td,  $J = 7.5, 3.4$  Hz, 2H), 1.69 – 1.59 (m, 3H), 1.55 – 1.28 (m, 6H), 1.25 (t,  $J = 7.1$  Hz, 3H), 1.20 (dtd,  $J = 8.6, 7.1, 1.5$  Hz, 1H), 0.98 (td,  $J = 8.1, 4.4$  Hz, 1H), 0.90 (ddd,  $J = 7.3, 5.5, 4.5$  Hz, 1H).  $^{13}\text{C}$  NMR (101 MHz, Chloroform-*d*)  $\delta$  173.8, 173.2, 136.2, 128.7, 128.3, 128.3, 66.2, 60.4, 34.4, 29.4, 28.9, 26.9, 25.1, 21.9, 18.3, 14.5, 13.5. HR-MS (FAB+):  $[\text{M}+\text{H}]^+$   $\text{C}_{19}\text{H}_{27}\text{O}_4$ , calculated 319.1909, found 319.1903.

*Trans*-**3ja** from  $\text{Rh}_2(\text{OAc})_4$ -catalyzed reaction.  $^1\text{H}$  NMR (400 MHz, Chloroform-*d*)  $\delta$  7.35 (s, 2H), 7.41 – 7.29 (m, 3H), 5.11 (s, 2H), 4.11 (qd,  $J = 7.2, 0.7$  Hz, 2H), 2.35 (t,  $J = 7.5$  Hz, 2H), 1.68 – 1.59 (m, 3H), 1.45 – 1.29 (m, 7H), 1.25 (t,  $J = 7.1$  Hz, 3H), 1.18 – 1.09 (m, 1H), 0.67 (ddd,  $J = 7.8, 6.0, 4.1$  Hz, 1H).  $^{13}\text{C}$  NMR (101 MHz, Chloroform-*d*)  $\delta$  174.6, 173.6, 136.1, 128.6, 128.2, 66.1, 60.3, 34.2, 32.8, 28.8, 28.7, 24.9, 22.8, 20.2, 15.5, 14.3.

### Ethyl (*E*)-2-(prop-1-en-1-yl)cyclopropane-1-carboxylate (**3k**)

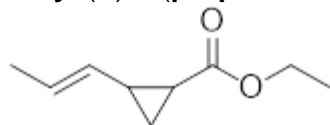

Both *trans*- and *cis*-**3k** are known compounds.<sup>42</sup> Terminal alkene cyclopropanation of (*E*)-penta-1,3-diene **2k** and EDA **1** accomplished via preparative-scale enzymatic reaction gave *cis*-**3k** (ApePgb AGW) and *trans*-**3k** (RmaNOD Q52V).

*Cis*-**3k**  $^1\text{H}$  NMR (400 MHz, Chloroform-*d*)  $\delta$  5.66 (dq,  $J = 15.4, 6.5$  Hz, 1H), 5.41 (ddq,  $J = 15.3, 8.6, 1.7$  Hz, 1H), 4.22 – 4.03 (m, 2H), 1.89 – 1.78 (m, 2H), 1.67 (dd,  $J = 6.5, 1.7$  Hz, 3H), 1.26 (t, 3H), 1.23 – 1.10 (m, 2H).

*Trans*-**3k**  $^1\text{H}$  NMR (400 MHz, Chloroform-*d*)  $\delta$  5.60 (dq,  $J = 15.1, 6.5, 0.8$  Hz, 1H), 5.03 (ddq,  $J = 15.2, 8.3, 1.7$  Hz, 1H), 4.12 (q,  $J = 7.1$  Hz, 2H), 1.95 (dddd,  $J = 9.4, 8.5, 6.3, 4.0$  Hz, 1H), 1.65 (dd,  $J = 6.5, 1.7$  Hz, 3H), 1.57 – 1.53 (m, 1H), 1.31 (ddd,  $J = 9.2, 5.1, 4.3$  Hz, 1H), 1.26 (t,  $J =$

7.1 Hz, 3H), 0.91 (ddd,  $J = 8.3, 6.3, 4.3$  Hz, 1H).  $^{13}\text{C}$  NMR (101 MHz, Chloroform- $d$ )  $\delta$  173.9, 130.9, 126.1, 60.7, 25.0, 21.8, 17.9, 15.6, 14.4. HR-MS (EI+):  $[\text{M}]^+$   $\text{C}_9\text{H}_{14}\text{O}_2$ , calculated 154.0994, found 154.0974. *Trans*-**3k** optical rotation from RmaNOD Q52V product:  $[\alpha]_{\text{D}}^{23} = +164^\circ$  (c 0.1, EtOAc).

### Ethyl (*Z*)-2-(prop-1-en-1-yl)cyclopropane-1-carboxylate (**3l**)

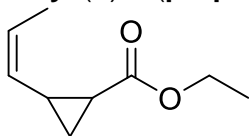

Both *trans*- and *cis*-**3l** are known compounds.<sup>42</sup> General procedure A was used to produce a mixture of 8 possible cyclopropanes (internal and terminal) for chiral GC standard from (*Z*)-penta-1,3-diene **2l** and EDA **1**. Stereoselective, terminal alkene cyclopropanation accomplished via preparative-scale enzymatic reaction (ApePgb AGW).

*Cis*-**3l**  $^1\text{H}$  NMR (400 MHz, Chloroform- $d$ )  $\delta$  5.56 (dq,  $J = 10.9, 6.9, 1.1$  Hz, 1H), 5.34 (ddq,  $J = 11.0, 9.3, 1.8$  Hz, 1H), 4.21 – 4.04 (m, 2H), 2.16 – 2.03 (m, 1H), 1.92 (ddd,  $J = 8.8, 7.8, 6.0$  Hz, 1H), 1.72 (dd,  $J = 6.8, 1.8$  Hz, 3H), 1.25 (t,  $J = 7.1$  Hz, 3H), 1.23 – 1.17 (m, 2H).  $^{13}\text{C}$  NMR (101 MHz, Chloroform- $d$ )  $\delta$  172.3, 127.2, 126.3, 60.5, 21.0, 19.2, 14.5, 14.5, 13.3. *Cis*-**3l** optical rotation from ApePgb AGW product:  $[\alpha]_{\text{D}}^{23} = -260^\circ$  (c 0.1, EtOAc).

### Ethyl 2-(3-oxobutyl)cyclopropane-1-carboxylate (**3m**)

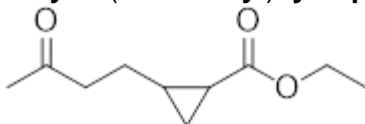

*Cis*-**3m** is a known compound.<sup>16</sup> General procedure B was used to produce a mixture of 55:45 *trans/cis* **3m**, and a preparative-scale enzymatic reaction (ApePgb AGW) produced *cis*-**3m**.

*Cis*-**3m**  $^1\text{H}$  NMR (400 MHz, Chloroform- $d$ )  $\delta$  4.13 (q,  $J = 7.1$  Hz, 2H), 2.46 (td,  $J = 7.3, 2.3$  Hz, 2H), 2.13 (s, 3H), 1.94 – 1.62 (m, 3H), 1.26 (t,  $J = 7.1$  Hz, 4H), 1.06 – 0.86 (m, 2H).  $^{13}\text{C}$  NMR (101 MHz, Chloroform- $d$ )  $\delta$  208.9, 173.2, 60.7, 43.7, 30.2, 21.8, 21.3, 18.6, 14.7, 13.8. HR-MS (FAB+):  $[\text{M}+\text{H}]^+$   $\text{C}_{10}\text{H}_{17}\text{O}_3$ , calculated 185.1178, found 185.1171. *Cis*-**3m** optical rotation from ApePgb AGW product:  $[\alpha]_{\text{D}}^{23} = -52^\circ$  (c 0.1, EtOAc).

### Compound chiral separation conditions and representative traces

Chiral trace figures here are produced via Jupyter Notebook. The Jupyter notebook and raw data traces are available as supplemental files.

**Supplemental Table 9.** Chromatographic separation conditions. Column dimensions: Cyclosil-B 30 m length x 0.32 mm ID x 0.25  $\mu\text{m}$  film thickness; Chiraldex G-TA 30 m length x 0.25 mm ID x 0.12  $\mu\text{m}$  film thickness; DB-WAXETR (15 / 30 m) length x 0.32 mm ID x 0.25  $\mu\text{m}$  film thickness; Chiralpak IC 4.6 mm x 250 mm x 5  $\mu\text{m}$ ; Chiralpak IA 4.6 mm x 250 mm x 5  $\mu\text{m}$ .

| Compound   | Instrument / column      | Method                                                                            | Retention times                                                                                               |
|------------|--------------------------|-----------------------------------------------------------------------------------|---------------------------------------------------------------------------------------------------------------|
| <b>3a</b>  | GC-FID, Cyclosil-B       | 90°C isothermal                                                                   | <i>Cis</i> 67.9 min, 69.5 min; <i>trans</i> 81.7 min, 83.5 min                                                |
| <b>3b</b>  | GC-FID, Cyclosil-B       | 80°C hold 2 min, 30°C min <sup>-1</sup> to 140°C hold 40 min                      | <i>cis</i> 30.2 min, 30.9 min; <i>trans</i> 35.7 min (unresolved)                                             |
|            | HPLC, Chiralpak IC       | Hexane: 0.8% isopropanol isocratic                                                | <i>cis</i> 7.1 min, 7.3 min (unresolved); <i>trans</i> 8.9 min, 10.3 min                                      |
| <b>3c</b>  | GC-FID, Cyclosil-B       | 80°C hold 2 min, 30°C min <sup>-1</sup> to 170°C hold 30 min                      | <i>Trans</i> 24.5 min (unresolved); <i>cis</i> 26.4 min, 26.8 min                                             |
|            | HPLC, Chiralpak IC       | Hexane:16% isopropanol isocratic                                                  | <i>Cis</i> 4.6 min (unresolved); <i>trans</i> 6.4 min, 7.2 min                                                |
| <b>3d</b>  | GC-FID, Chiraldex G-TA   | 100°C, 2°C min <sup>-1</sup> to 170°C                                             | <i>Cis</i> 25.1 min, 25.3 min; <i>trans</i> 27.1 min, 27.2 min                                                |
| <b>3e</b>  | GC-FID, Cyclosil-B       | 80°C hold 2 min, 30°C min <sup>-1</sup> to 100°C hold 80 min                      | <i>Cis</i> 44.7 min, 46.8 min; <i>trans</i> 76.6 min, 78.2 min                                                |
| <b>3f</b>  | GC-FID, Chiraldex G-TA   | 80°C isothermal                                                                   | 50.05 min, 51.0 min                                                                                           |
| <b>3g</b>  | HPLC, Chiralpak IC       | Hexane: 9% isopropanol isocratic                                                  | <i>Trans</i> 8.7 min, 9.7 min (second peak coelution with EDA dimer)                                          |
|            | GC-FID, Cyclosil-B       | 80°C hold 2 min, 30°C min <sup>-1</sup> to 125°C hold 12 min                      | <i>Cis</i> 12.5 min, 12.7 min                                                                                 |
| <b>3h</b>  | GC-FID, Cyclosil-B       | 80°C hold 2 min, 20°C min <sup>-1</sup> to 120°C, 6 °C min <sup>-1</sup> to 180°C | <i>Trans</i> 13.7 min, 13.8 min                                                                               |
| <b>3i</b>  | GC-FID, DB-WAXETR (30 m) | 80°C hold 2 min, 10°C min <sup>-1</sup> to 170°C                                  | <b>2i</b> 8.4 min; EDA dimer (byproducts) 8.9 min, 10.1 min; <i>cis-3i</i> 14.5 min, <i>trans-3i</i> 14.6 min |
| <b>3ia</b> | HPLC, Chiralpak IA       | Hexane: 0.5% isopropanol isocratic                                                | <i>Cis</i> 8.7 min, 9.0 min                                                                                   |
| <b>3j</b>  | GC-FID, DB-WAXETR (15 m) | 90°C hold 2 min, 10°C min <sup>-1</sup> to 250°C                                  | EDA dimer (byproducts) 5.0 min, 6.2 min, <b>2j</b> 9.7 min, <i>cis-3j</i> 16.6 min, <i>trans-3j</i> 16.7 min  |
| <b>3ja</b> | HPLC, Chiralpak IC       | Hexane: 1% isopropanol isocratic                                                  | <i>Cis</i> 24.9 min, 26.2 min                                                                                 |
| <b>3k</b>  | GC-FID, Cyclosil-B       | 80°C hold 2 min, 5°C min <sup>-1</sup> to 140°C                                   | Terminal cyclopropane products: <i>cis</i> 9.5 min, 9.6 min; <i>trans</i> 9.9 min, 10.1 min                   |
| <b>3l</b>  | GC-FID, Cyclosil-B       | 80°C hold 2 min, 10°C min <sup>-1</sup> to 85°C hold 20 min                       | Terminal cyclopropane products: <i>cis</i> 15.8 min, 16.3 min; <i>trans</i> 17.6 min, 20.4 min                |
| <b>3m</b>  | GC-FID, Chiraldex G-TA   | 90°C isothermal                                                                   | <i>Cis</i> 112.7 min, 114.6 min                                                                               |

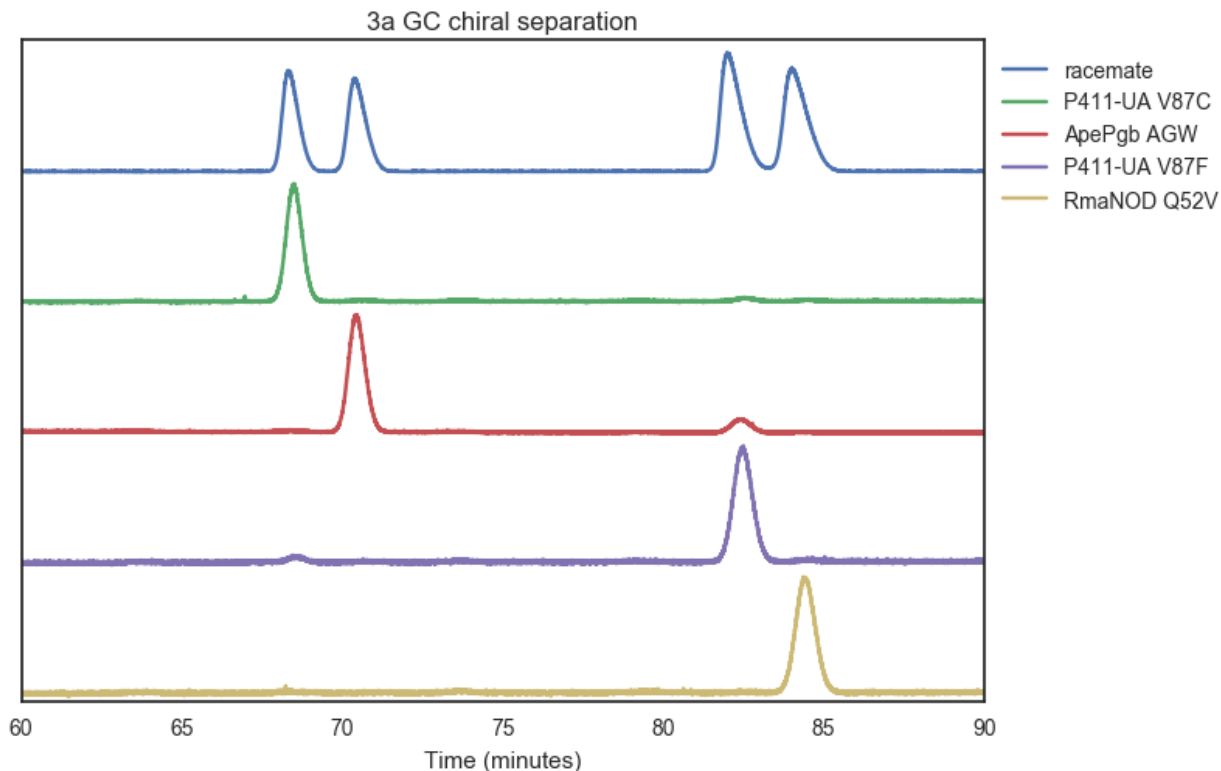

**Supplemental Figure 3.** Representative GC trace of **3a** (1-octene + EDA). Chiral GC trace of authentic standard ( $\text{Rh}_2(\text{OAc})_4$ -catalyzed) and each of the final variants.

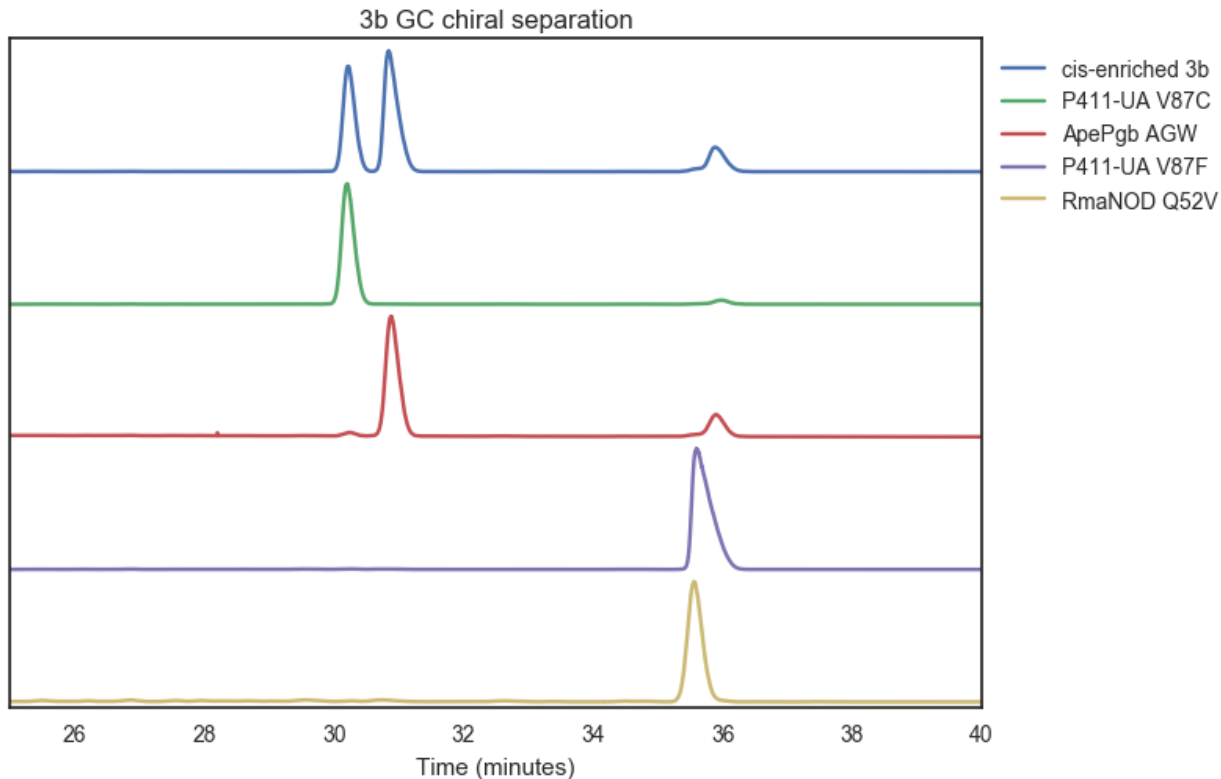

**Supplemental Figure 4.** Representative GC trace of **3b** (4-phenyl-1-butene + EDA). Chiral GC trace of **3b** product formation. *Trans-3b* peaks (35.7 min) are not baseline separated.

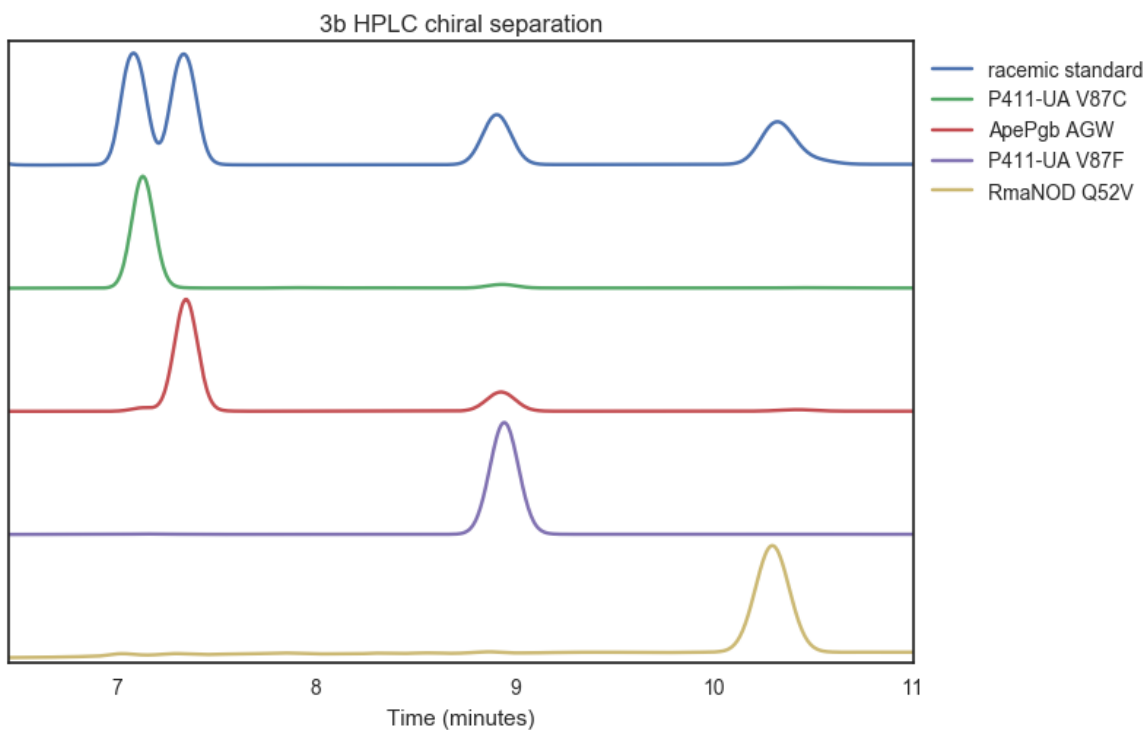

**Supplemental Figure 5.** Representative HPLC trace of **3b** (4-phenyl-1-butene + EDA). Chiral HPLC trace of **3b** product formation.

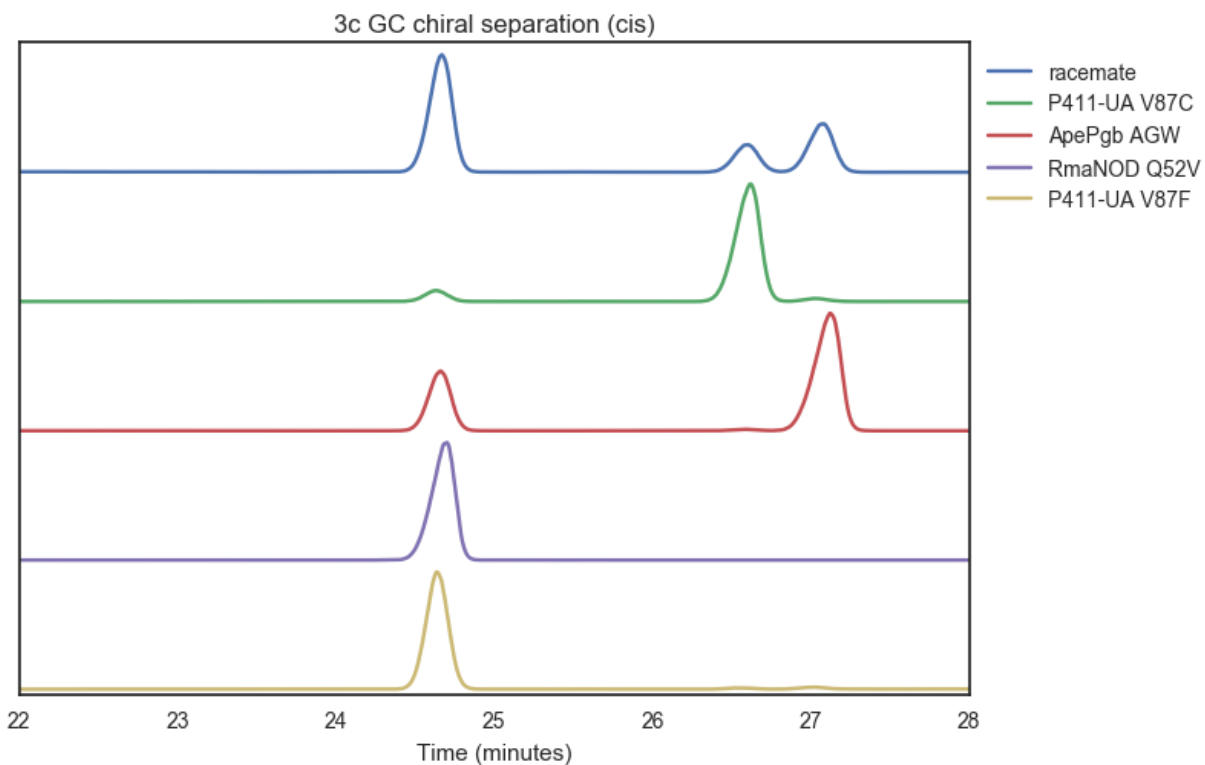

**Supplemental Figure 6.** Representative GC trace of **3c** (benzyl acrylate + EDA). *Trans*-**3c** (24.5 min) was not resolved on the Cyclosil-B column.

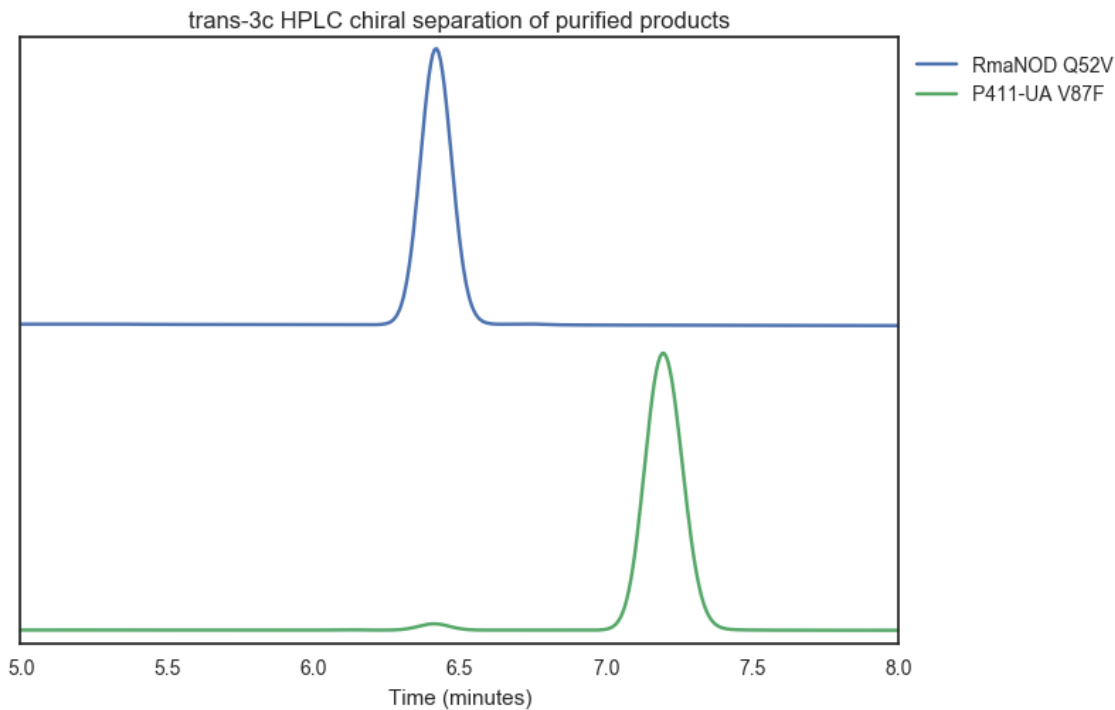

**Supplemental Figure 7.** Representative HPLC trace of *trans*-**3c** (benzyl acrylate + EDA). Enzymatic samples were from purified, preparative-scale enzymatic reactions.

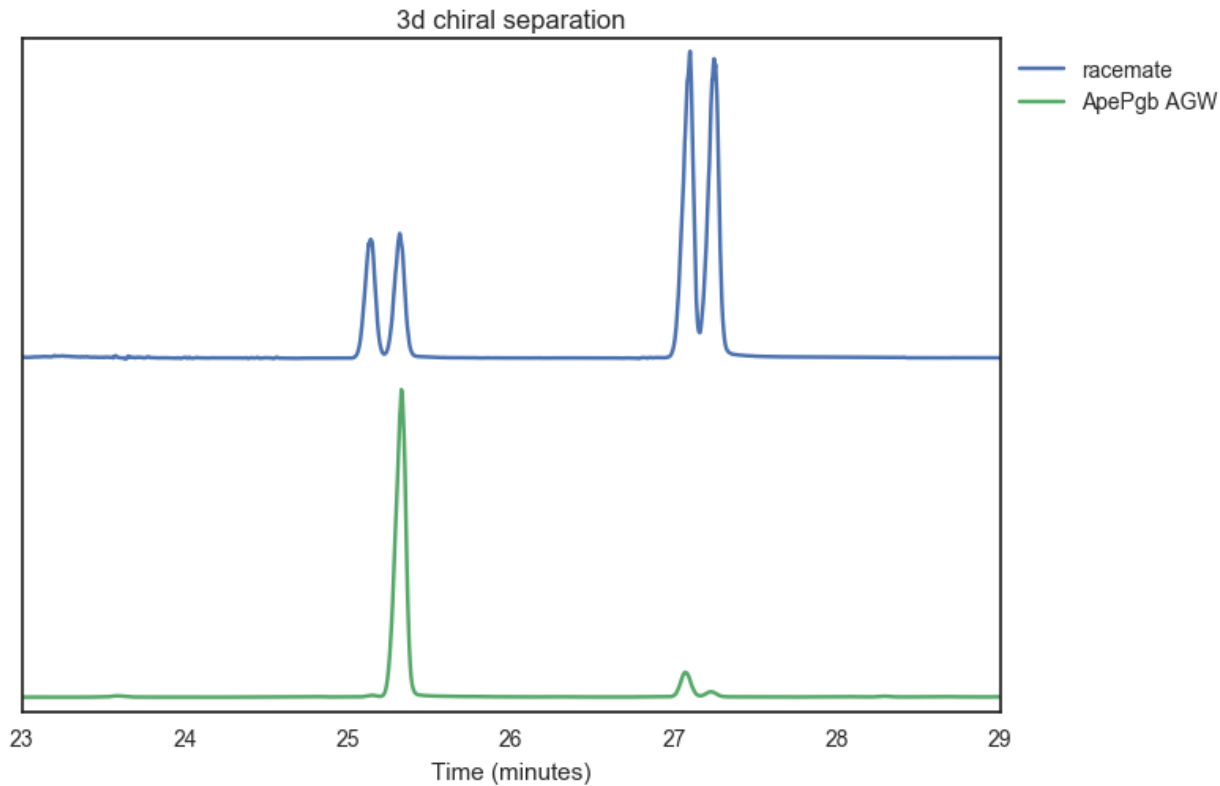

**Supplemental Figure 8.** Representative GC trace of **3d** (6-bromo-1-hexene + EDA).

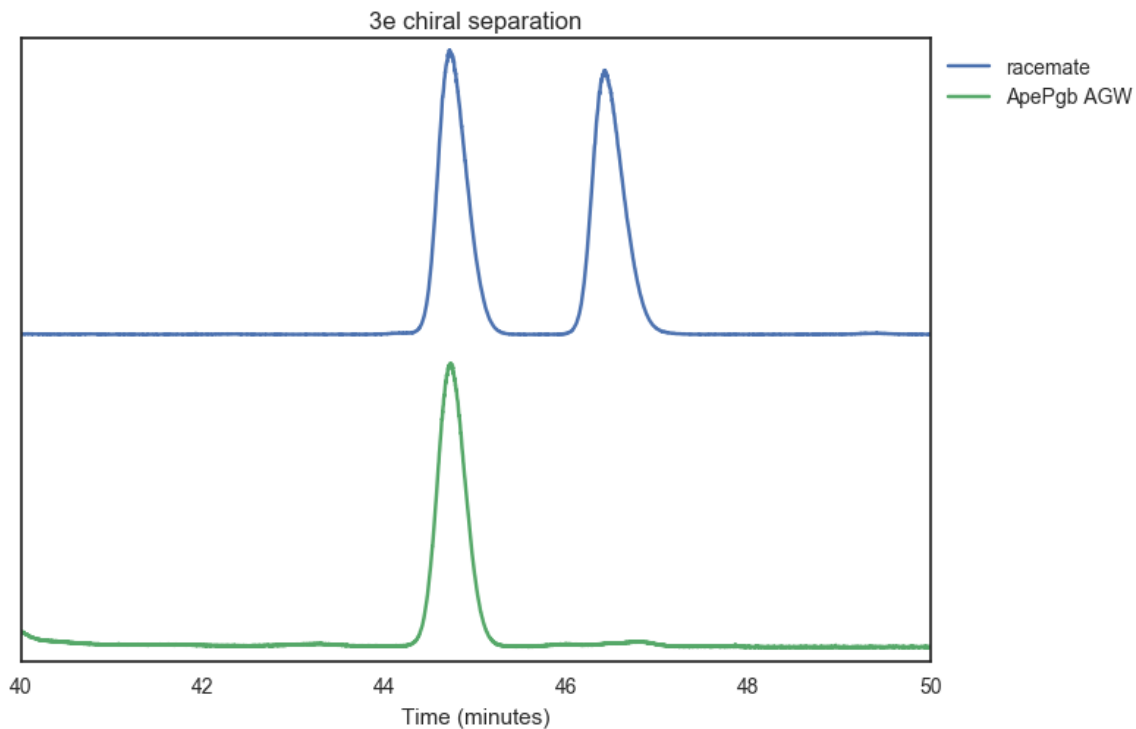

**Supplemental Figure 9.** Representative chiral GC trace of **3e** (vinylcyclohexane + EDA).

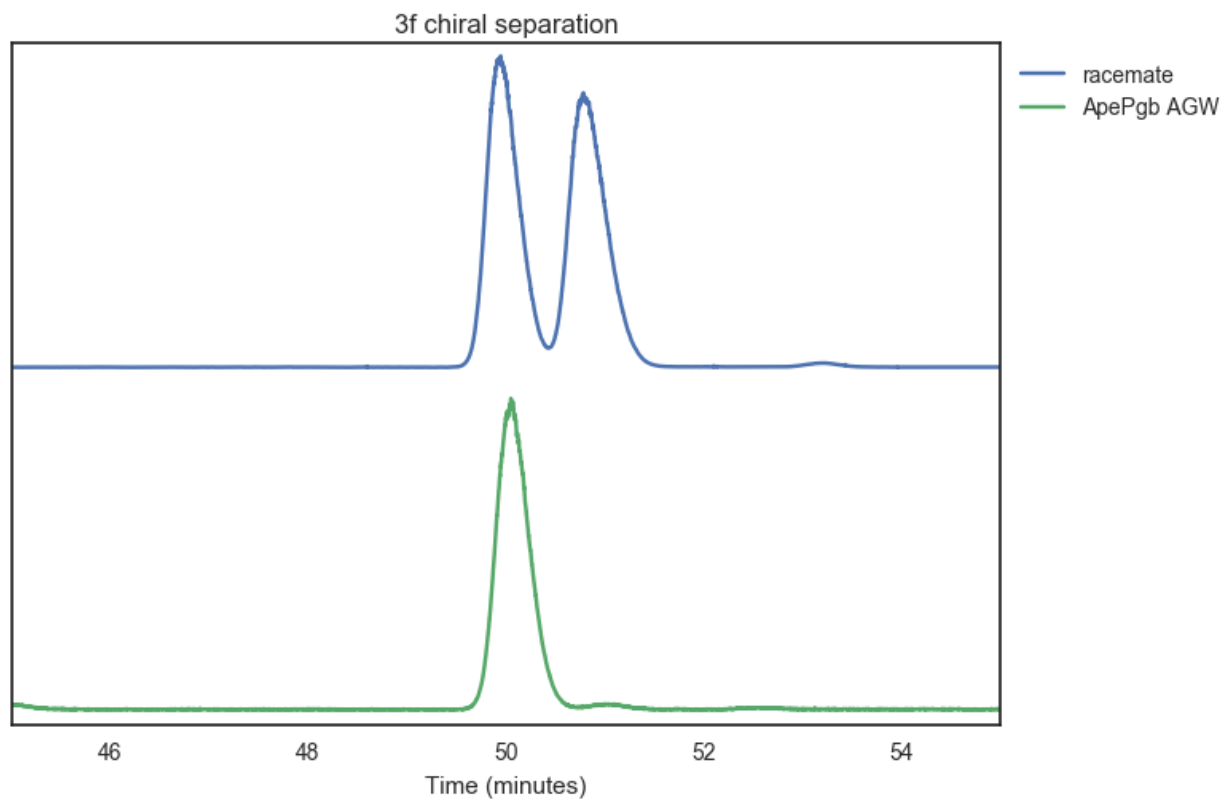

**Supplemental Figure 10.** Representative chiral GC trace of **3f** (methylencyclohexane + EDA).



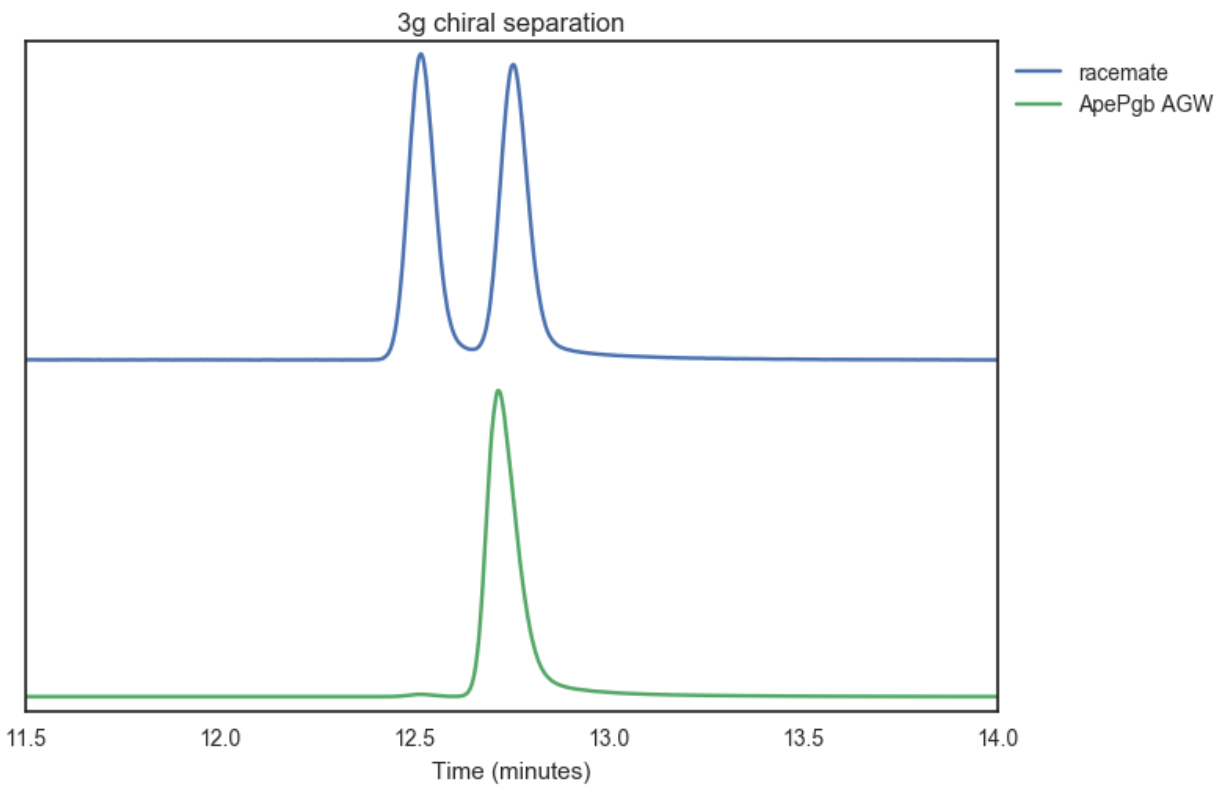

**Supplemental Figure 11.** Representative chiral GC trace of *cis*-**3g** (1-penten-3-one + EDA).

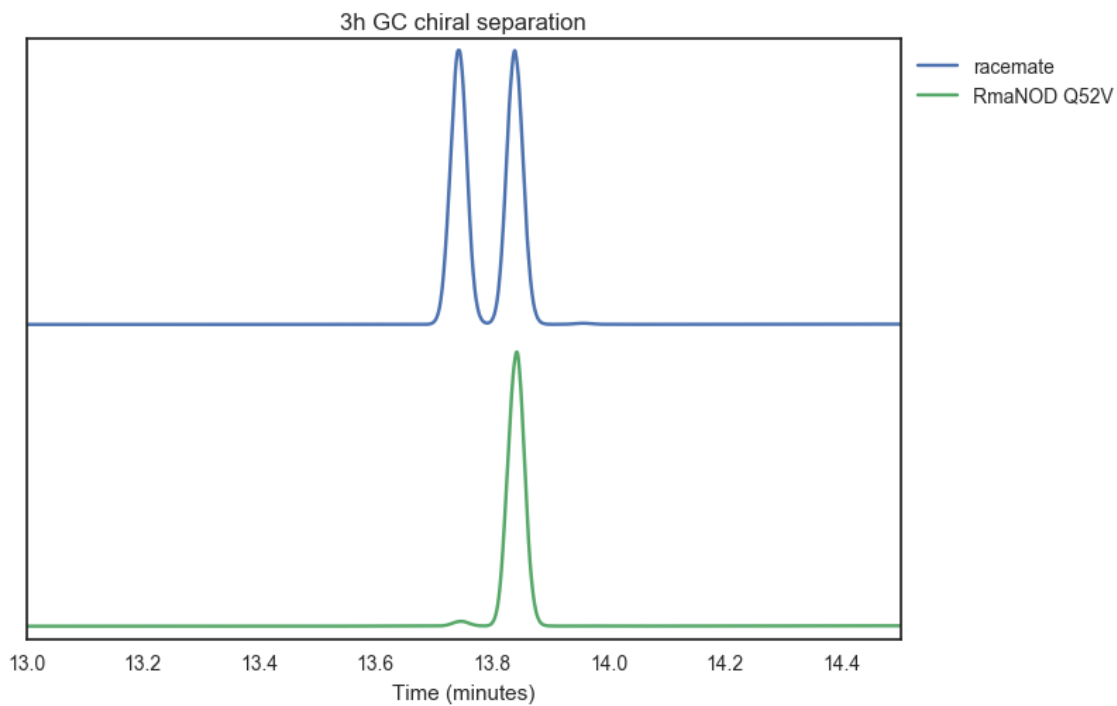

**Supplemental Figure 12.** Representative chiral GC trace of **3h** (2-vinylpyridine + EDA).

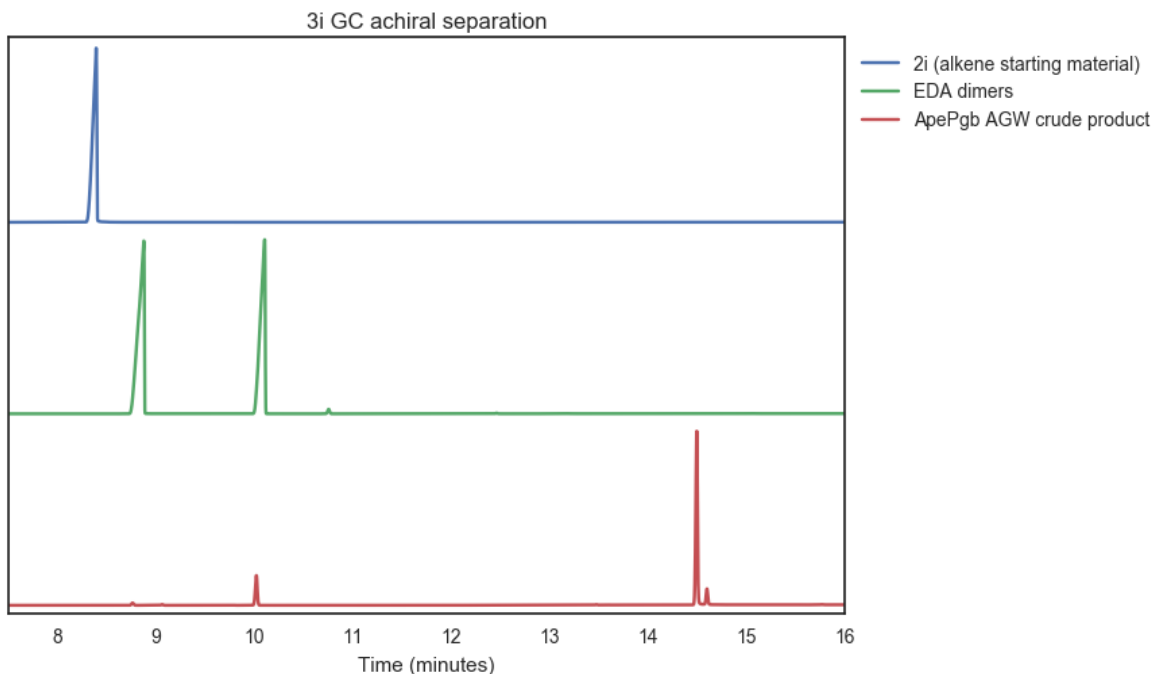

**Supplemental Figure 13.** Representative achiral GC trace of **3i** (7-octen-1-ol + EDA). Offset traces show 7-octen-1-ol starting material **2i**, EDA dimers (diethyl fumarate and diethyl maleate), and the crude reaction mixture from ApePgb AGW-catalyzed preparative-scale reaction.

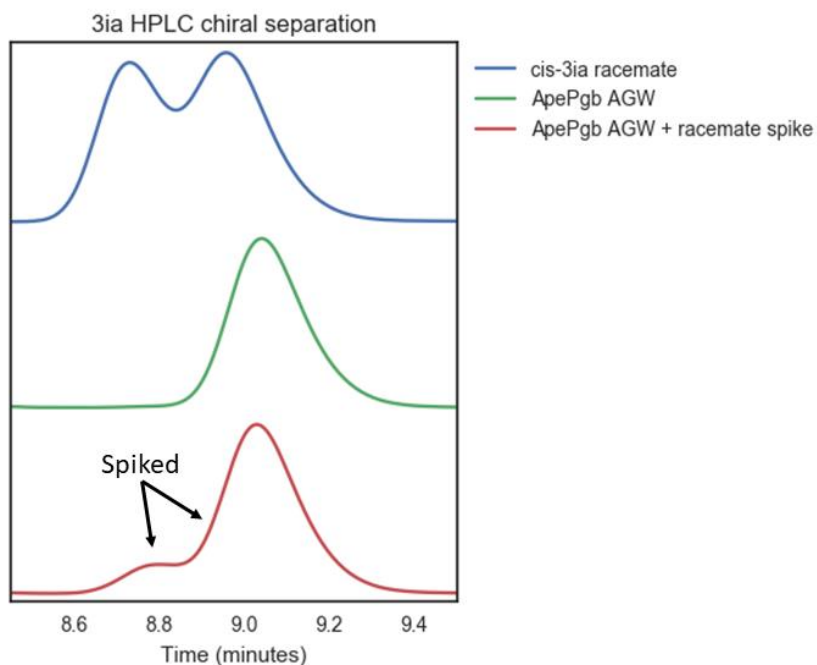

**Supplemental Figure 14.** Chiral HPLC trace of **3ia**. Conditions for the baseline separation of isomers were not found, but a spike-in of racemic standard into the ApePgb AGW-catalyzed preparative-scale reaction shows the first enantiomer peak was not previously observed and that the enzyme-catalyzed product has high enantiopurity.

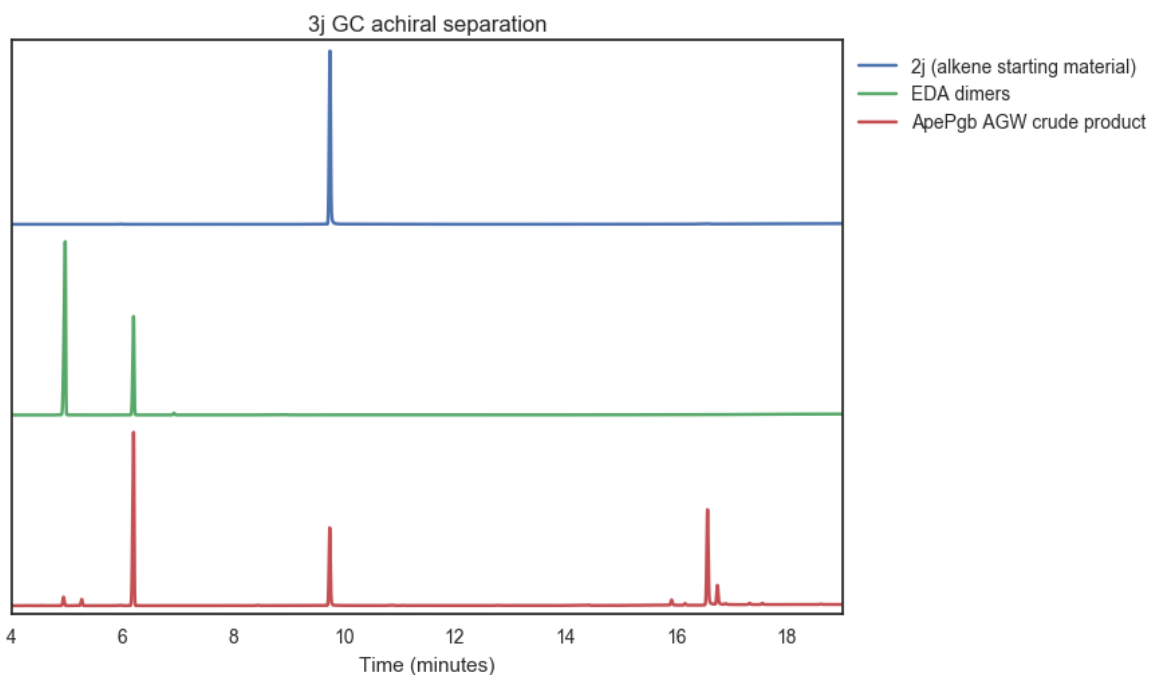

**Supplemental Figure 15.** Representative achiral GC trace of **3j** (7-octen-1-oic acid + EDA). Offset traces show 7-octen-1-oic acid starting material **2j**, EDA dimers (diethyl fumarate and diethyl maleate), and the crude reaction mixture from ApePgb AGW-catalyzed preparative-scale reaction.

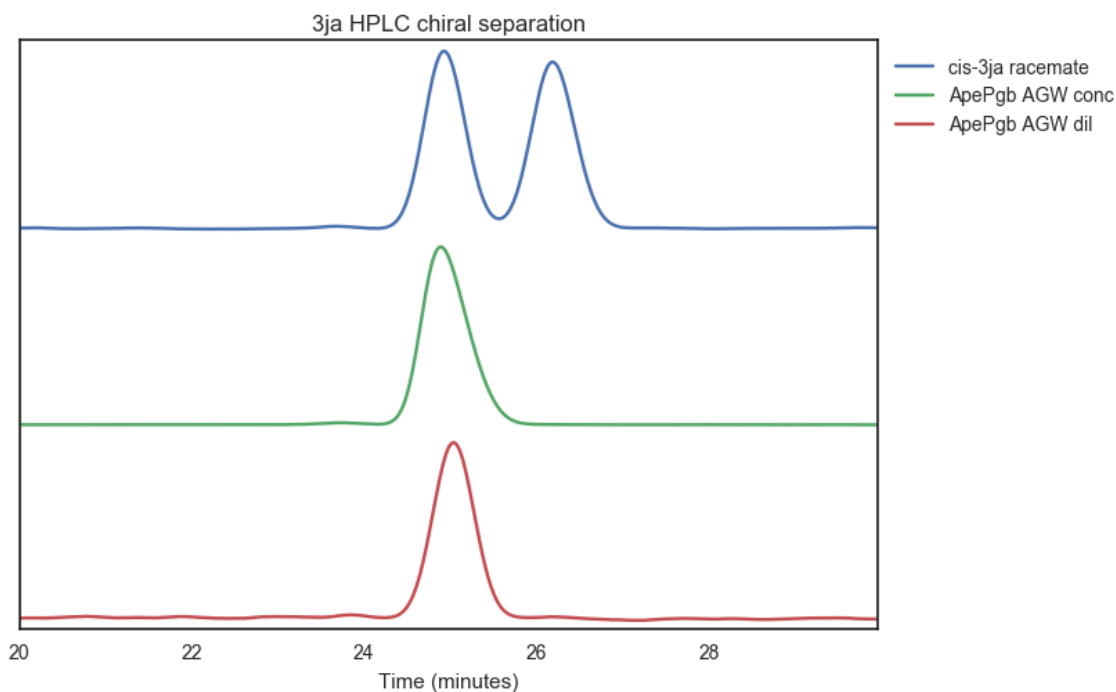

**Supplemental Figure 16.** Chiral HPLC trace of **3ja**. ApePgb AGW-catalyzed preparative-scale reaction was run at both concentrated (approximately  $5 \text{ mg mL}^{-1}$ , green) and dilute (approximately  $0.5 \text{ mg mL}^{-1}$ , red) conditions.

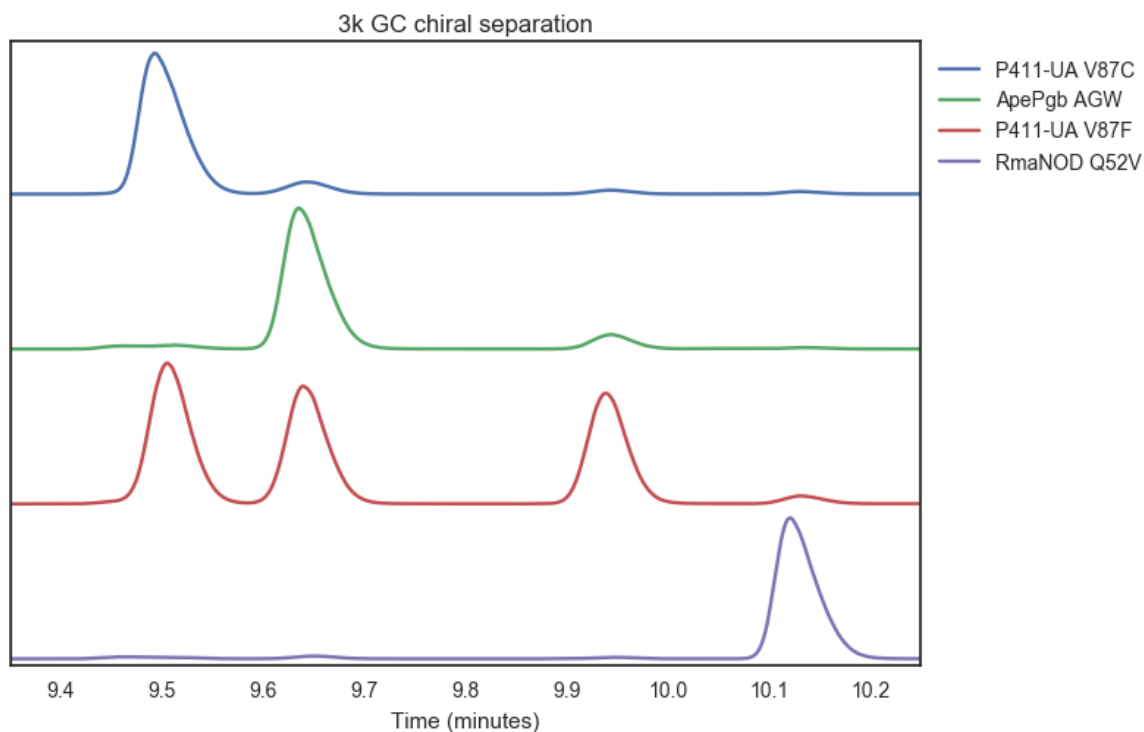

**Supplemental Figure 17.** Representative GC trace of **3k** ((*E*)-penta-1,3-diene + EDA). Offset chiral GC-FID trace of **3k** from the four final variants.

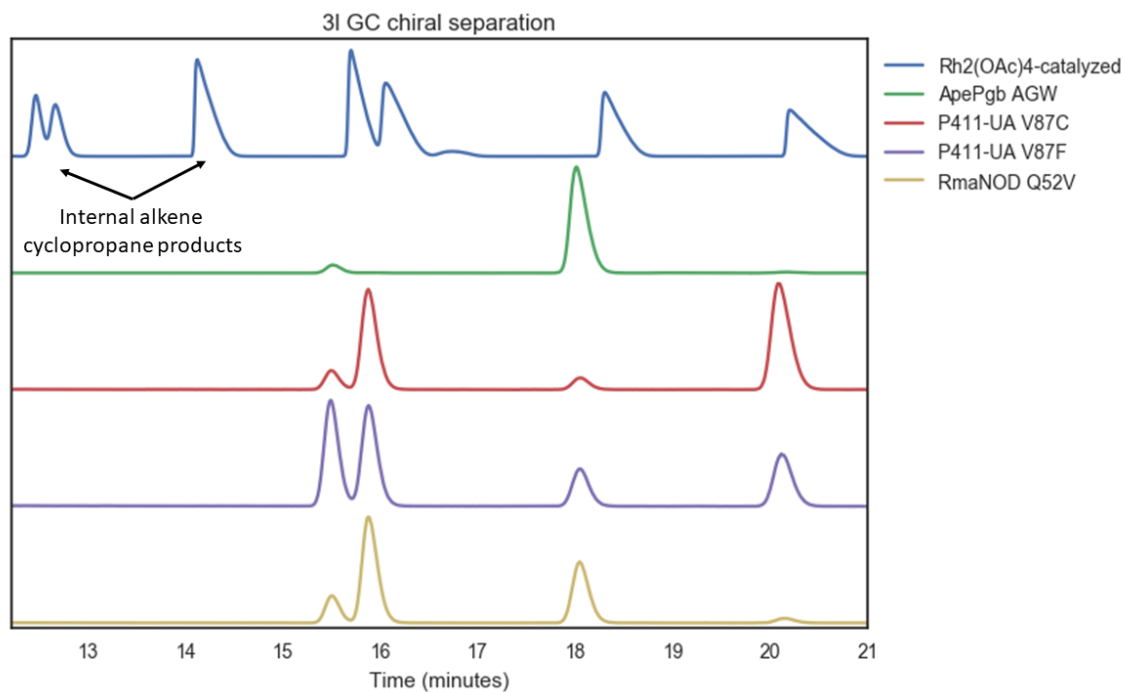

**Supplemental Figure 18.** Representative GC trace of **3l** ((*Z*)-penta-1,3-diene + EDA). Chiral GC-FID trace of **3l** authentic standard; 3 of 4 enantiomeric pairs had separation; the fourth was an internal cyclopropanation product not observed in the enzymatic reactions (14 minutes). Offset chiral GC-FID trace of **3l** from the four final variants.

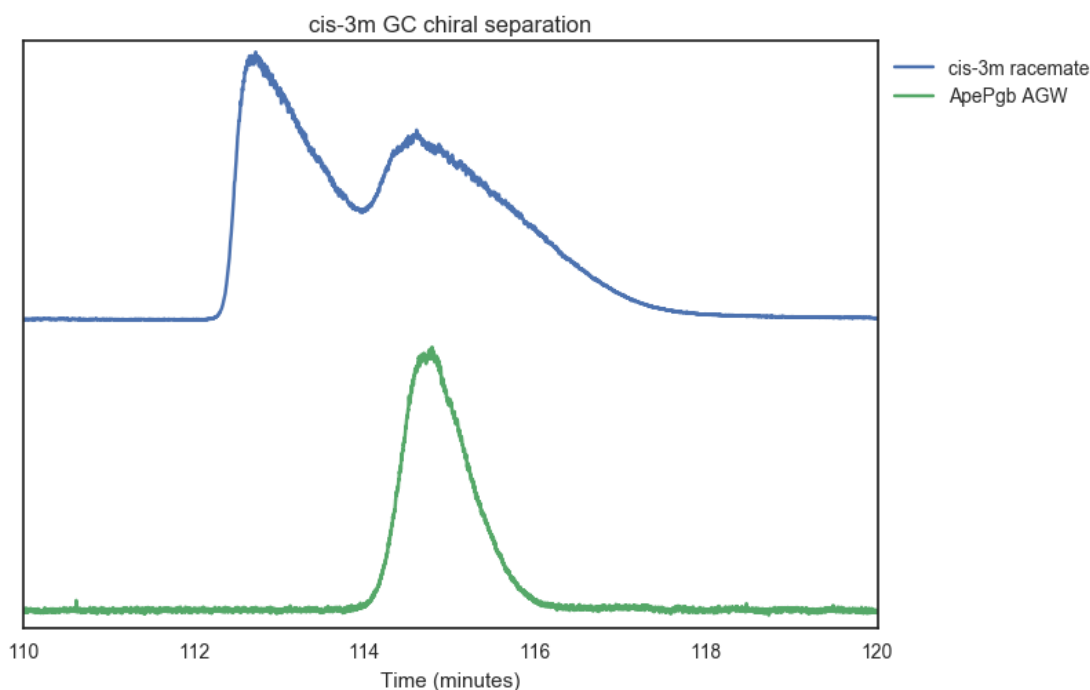

**Supplemental Figure 19.** Representative chiral GC trace of *cis*-**3m**.

### Calibration curves for analytical-scale TTN determination

Calibration curves were prepared with analogous conditions to the analytical scale reactions. Cyclopropane product standards were diluted in ethanol and added (20  $\mu\text{L}$ ) to M9-N buffer (380  $\mu\text{L}$ ), with final concentrations of product ranging from 0 – 20 mM (with two to three technical replicates). The samples were worked up the same as analytical-scale reactions, by the addition of HCl (16  $\mu\text{L}$ , 3 M stock) and internal standard (16  $\mu\text{L}$  of 40 mM acetophenone in cyclohexane). Cyclohexane (700  $\mu\text{L}$ ) was added and the samples were transferred into 1.7 mL Eppendorf tubes for extraction. The extraction was carried out with a Retsch MM 301 mixing mill (1 minute, 30 Hz / 1800 rpm). Samples were centrifuged at 20000 $\times$ g for 5 minutes at RT and the organic layer was used for chromatographic analysis. Cyclopropane products for methylenecyclohexane **3g** and 2-vinylpyridine **3h** were set up in the same way, with the exception of running ten single replicates over the 0 to 20 mM product range.

The ratio of the product area and internal standard (P/S ratio) was determined for each sample, and a linear regression was performed for the P/S ratio versus the known concentration in each reaction, with the y-intercept set to 0. The resulting slopes were used to determine the concentration of product in the analytical-scale reactions, which is in turn used to calculate the total turnover number (TTN) per enzyme.

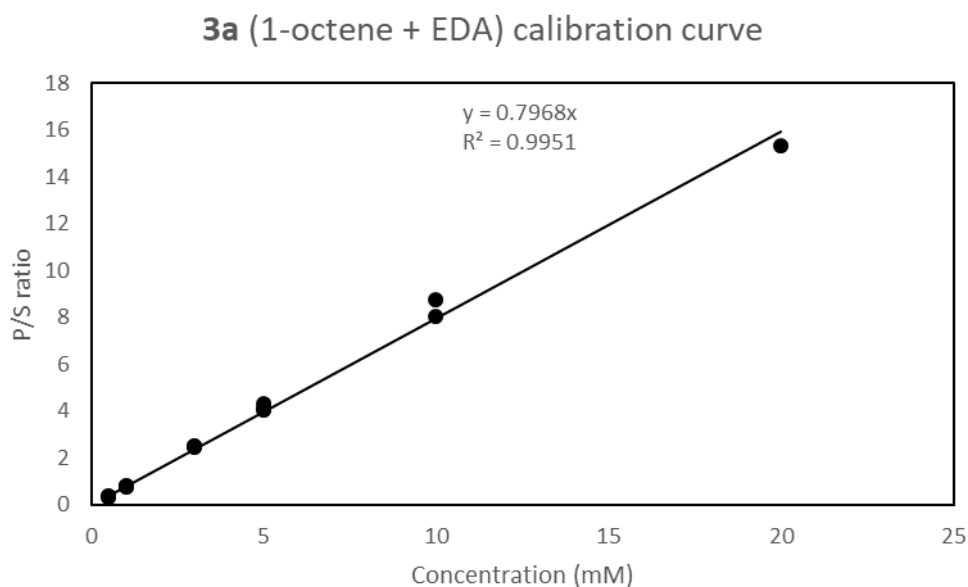

**Supplemental Figure 20.** Achiral GC calibration curve of **3a** (1-octene + EDA).

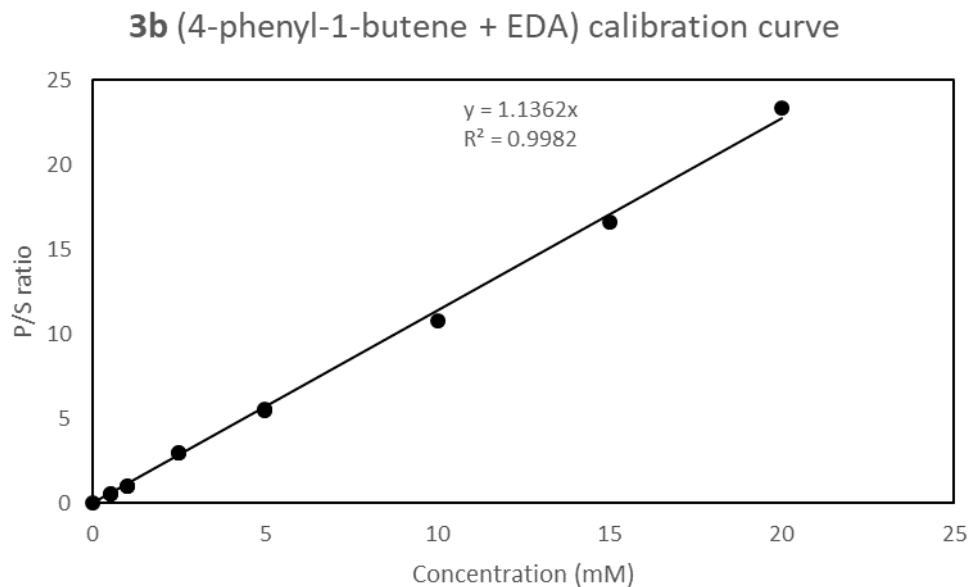

**Supplemental Figure 21.** Achiral GC calibration curve of **3b** (4-phenyl-1-butene + EDA).

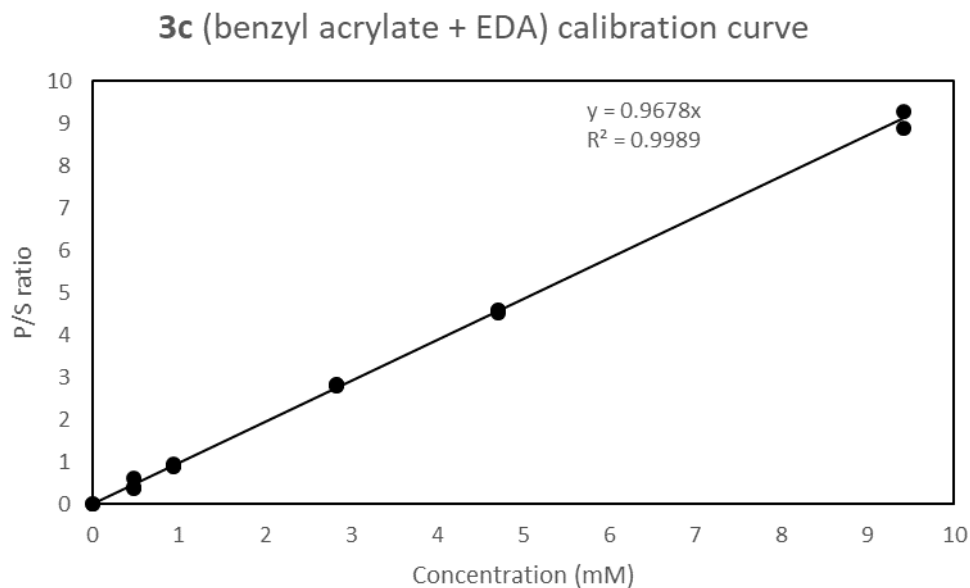

**Supplemental Figure 22.** Achiral GC calibration curve of **3c** (benzyl acrylate + EDA).

**3d** (6-Br-1-hexene + EDA) calibration curve

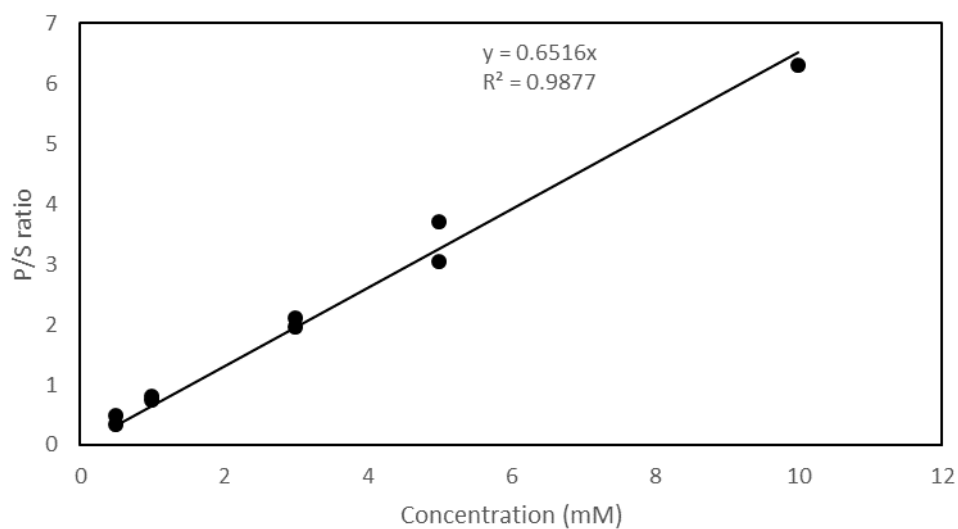

**Supplemental Figure 23.** Achiral GC calibration curve of **3d** (6-bromo-1-hexene + EDA).

**3e** (vinyl cyclohexane + EDA) calibration curve

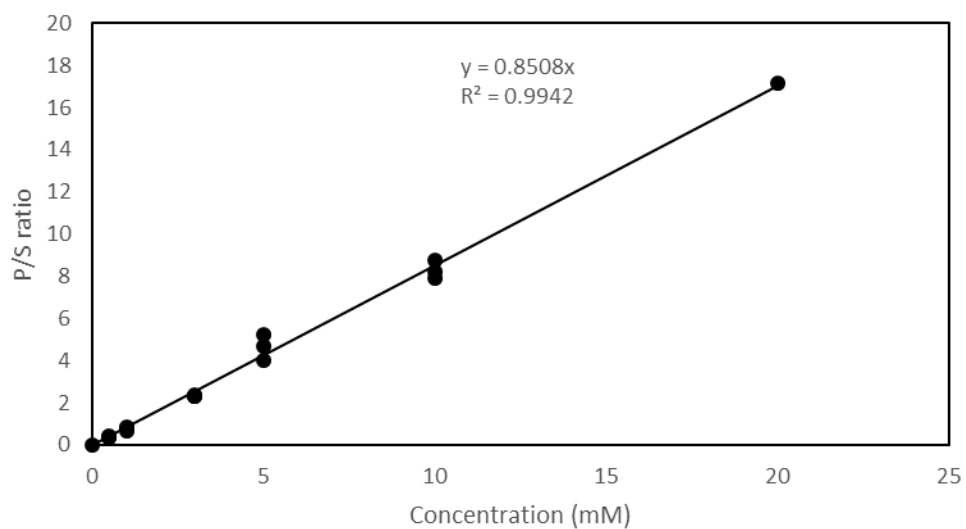

**Supplemental Figure 24.** Achiral GC calibration curve of **3e** (vinylcyclohexane + EDA).



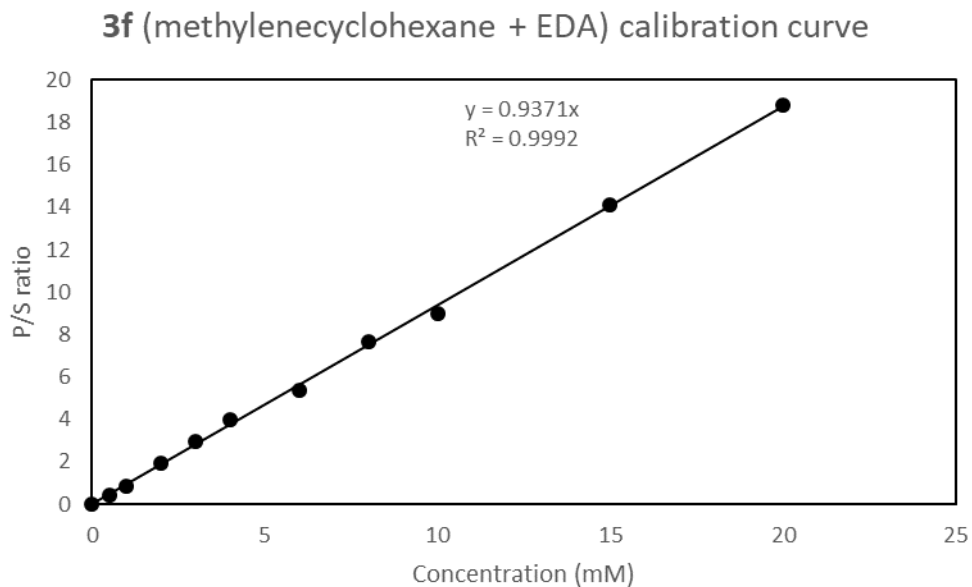

**Supplemental Figure 25.** Achiral GC calibration curve of **3f** (methylenecyclohexane + EDA).

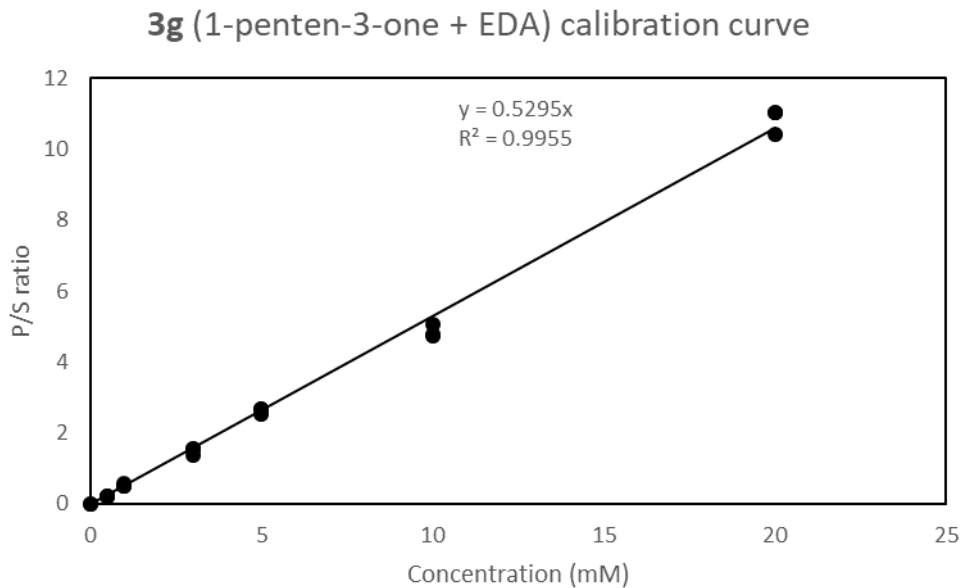

**Supplemental Figure 26.** Achiral GC calibration curve of **3g** (1-penten-3-one + EDA).

**3h** (2-vinylpyridine + EDA) calibration curve

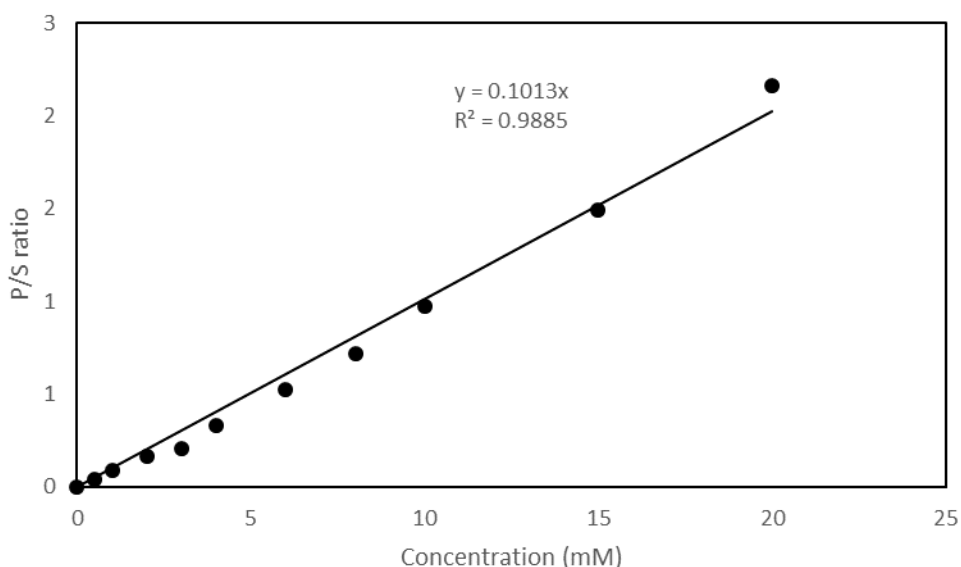

**Supplemental Figure 27.** Achiral GC calibration curve of **3h** (2-vinylpyridine + EDA).

### Sequences of primers and variants

**Supplemental Table 10.** Primers used in the protein engineering described in the report. These primers are also available as a supplemental csv file.

| Primer name             | Primer sequence                             |
|-------------------------|---------------------------------------------|
| ApePgb_Y60X_NDT_f       | TTGACTTGTGGNDTGGTTGGGTAGCATCAAATGAGC        |
| ApePgb_Y60X_VHG_f       | TTGACTTGTGGVHGGTGGGTAGCATCAAATGAGC          |
| ApePgb_Y60X_TGG_f       | TTGACTTGTGGTGGGGTGGGTAGCATCAAATGAGC         |
| ApePgb_Y60X_univ_r      | CCACAAGTCAAGGATCTCATCAACTTGATC              |
| ApePgb_Y60G_W59X_NDT_f  | TTGATGAGATCCTTGACTTGNDTGGTGGTTGGGTAGCATC    |
| ApePgb_Y60G_W59X_VHG_f  | TTGATGAGATCCTTGACTTGVHGGTGGTTGGGTAGCATC     |
| ApePgb_Y60G_W59X_TGG_f  | N/A; WT codon is TGG                        |
| ApePgb_Y60G_W59X_univ_r | CAAGTCAAGGATCTCATCAACTTGATCTTTCAGAACGTC     |
| ApePgb_F73X_NDT_f       | ATGAGCATTTGATTTATTACNDTTCCAATCCGGATACAGGAG  |
| ApePgb_F73X_VHG_f       | ATGAGCATTTGATTTATTACVHGTCCAATCCGGATACAGGAG  |
| ApePgb_F73X_TGG_f       | ATGAGCATTTGATTTATTACTGGTCCAATCCGGATACAGGAG  |
| ApePgb_F73X_univ_r      | GTAATAAATCAAATGCTCATTTGATGCTACCCAACC        |
| ApePgb_F93X_NDT_f       | TGGAACGTGTACGCGCTCGCNDTGGAGCCTGGATTCTGGACAC |
| ApePgb_F93X_VHG_f       | TGGAACGTGTACGCGCTCGCVHGGAGCCTGGATTCTGGACAC  |
| ApePgb_F93X_TGG_f       | TGGAACGTGTACGCGCTCGCTGGGGAGCCTGGATTCTGGACAC |
| ApePgb_F93X_univ_r      | GCGAGCGCGTACACGTTCCAGGTATTCCTTAATAGGCTCTC   |
| ApePgb_F145X_NDT_f      | CACTTCGTTATCTTATCGCANDTATCTATCCTATCACCGCCAC |

|                             |                                                |
|-----------------------------|------------------------------------------------|
| ApePgb_F145X_VHG_f          | CACTTCGTTATCTTATCGCAVHGATCTATCCTATCACCGCCAC    |
| ApePgb_F145X_TGG_f          | CACTTCGTTATCTTATCGCATGGATCTATCCTATCACCGCCAC    |
| ApePgb_F145X_univ_r         | TGCGATAAGATAACGAAGTGGGATATGGGGCACGGTGCCT       |
| RmaNOD_Y32X_NDT_f           | CGCCACGATGNDTCGGCTGCTTTTCGAACG                 |
| RmaNOD_Y32X_VHG_f           | CGCCACGATGVHGGCGCTGCTTTTCGAACG                 |
| RmaNOD_Y32X_TGG_f           | CGCCACGATGTGGCGGCTGCTTTTCGAACG                 |
| RmaNOD_Y32X_univ_r          | CATCGTGGCGCTAATAGCGACTGAGTGTTCCTGC             |
| RmaNOD_Q52X_NDT_f           | CTTCCTGAGAGANDTATACACAAGCTTGCG                 |
| RmaNOD_Q52X_VHG_f           | CTTCCTGAGAGAVHGATACACAAGCTTGCG                 |
| RmaNOD_Q52X_TGG_f           | CTTCCTGAGAGATGGATACACAAGCTTGCG                 |
| RmaNOD_Q52X_univ_r          | TCTCTCAGGAAGTTCAAACAAGCTCCGCG                  |
| RmaNOD_V97X_NDT_f           | CCATTATCCGCTGNDTTGGGAATGTTTGAGAGACG            |
| RmaNOD_V97X_VHG_f           | CCATTATCCGCTGVHGTGGGAATGTTTGAGAGACG            |
| RmaNOD_V97X_TGG_f           | CCATTATCCGCTGTGGTGGGAATGTTTGAGAGACG            |
| RmaNOD_V97X_univ_r          | CAGCGGATAATGGACGGCCTGCACTCCTGC                 |
| P411_UA_437X_438X_NDT_NDT_f | GCTCGATATTAAGAAACTNDTNDTTTAAAACCTAAAGGC        |
| P411_UA_437X_438X_NDT_ACN_f | GCTCGATATTAAGAAACTNDTACNTTAAAACCTAAAGGC        |
| P411_UA_437X_438X_NDT_CAR_f | GCTCGATATTAAGAAACTNDTCARTTAAAACCTAAAGGC        |
| P411_UA_437X_438X_univ_r    | AGTTTCTTTAATATCGAGCTCGTAGTTTGTATGATCTTC        |
| P411_UA_A328X_NDT_f         | GCTTATGGCCAACTNDTCTGCGTTTTCC                   |
| P411_UA_A328X_VHG_f         | GCTTATGGCCAACTVHGCCTGCGTTTTCC                  |
| P411_UA_A328X_TGG_f         | GCTTATGGCCAACTTGGCCTGCGTTTTCC                  |
| P411_UA_A328X_univ_r        | AGTTGGCCATAAGCGCAGCGCTTCG                      |
| P411_UA_I263X_NDT_f         | CAAATTATTACATTCTTANDTGCGGGACACGAAGC            |
| P411_UA_I263X_VHG_f         | CAAATTATTACATTCTTAVHGGCGGGACACGAAGC            |
| P411_UA_I263X_TGG_f         | CAAATTATTACATTCTTATGGGCGGGACACGAAGC            |
| P411_UA_I263X_univ_r        | TAAGAATGTAATAATTTGATAGCGAATGTTCCCG             |
| P411_UA_V87X_NDT_f          | GCAGGAGACGGGTTANDTACAAGCTGGACGC                |
| P411_UA_V87X_VHG_f          | GCAGGAGACGGGTTAVHGACAAGCTGGACGC                |
| P411_UA_V87X_TGG_f          | GCAGGAGACGGGTTATGGACAAGCTGGACGC                |
| P411_UA_V87X_univ_r         | TAACCCGTCTCCTGCAAAATCACG                       |
| P411_UA_L181X_NDT_f         | GTATGGTCCGTGCANDTGATGAAGTAATGAACAAG            |
| P411_UA_L181X_VHG_f         | GTATGGTCCGTGCAVHGGATGAAGTAATGAACAAG            |
| P411_UA_L181X_TGG_f         | GTATGGTCCGTGCATGGGATGAAGTAATGAACAAG            |
| P411_UA_L181X_univ_r        | TGCACGGACCATACTTATAATAAATGGATGAGG              |
| P411_UA_L75X_NDT_f          | GATAAAAACTTAAGTCAAGCGNDTAAATTTGCACGTGATTTGCAGG |
| P411_UA_L75X_VHG_f          | GATAAAAACTTAAGTCAAGCGVHGAAATTTGCACGTGATTTGCAGG |
| P411_UA_L75X_TGG_f          | GATAAAAACTTAAGTCAAGCGTGGAAATTTGCACGTGATTTGCAGG |
| P411_UA_L75X_univ_r         | CGCTTGACTTAAGTTTTATCAAAGCGTGATTCATCGC          |
| P411_UA_E267X_NDT_f         | CTTAATCGCGGGACACNDTGCAACAAGTGGTCTTTTATC        |
| P411_UA_E267X_VHG_f         | CTTAATCGCGGGACACVHGGCAACAAGTGGTCTTTTATC        |



**Supplemental Table 12.** DNA sequences of reported biocatalysts. These sequences are also available as a supplemental csv file.

| Protein                                    | DNA sequence                                                                                                                                                                                                                                                                                                                                                                                                                                                                                                                                                                                                                                                          |
|--------------------------------------------|-----------------------------------------------------------------------------------------------------------------------------------------------------------------------------------------------------------------------------------------------------------------------------------------------------------------------------------------------------------------------------------------------------------------------------------------------------------------------------------------------------------------------------------------------------------------------------------------------------------------------------------------------------------------------|
| ApePgb<br>WT                               | ATGACTCCCTCGGACATCCCGGGATATGATTATGGGCGTGTGCGAGAAGTCACCCATCACGGACCTTG<br>AGTTTGACCTTCTGAAGAAGACTGTCATGTTAGGTGAAAAGGACGTAATGTACTTGAAAAAGGCGTG<br>TGACGTTCTGAAAGATCAAGTTGATGAGATCCTTGACTTGTGGTATGGTTGGGTAGCATCAAATGAG<br>CATTGATTTATTACTTCTCCAATCCGGATACAGGAGAGCCTATTAAGGAATACCTGGAACGTGTAC<br>GCGCTCGCTTTGGAGCCTGGATTCTGGACACTACCTGCCGCGACTATAACCGTGAATGGTTAGACTA<br>CCAGTACGAAGTTGGGCTTCGTATCACCCTTCAAAGAAAGGGGTACAGACGGAGTACGCACCGTG<br>CCCCATATCCCACTTCGTTATCTTATCGCATTTATCTATCCTATCACCGCCACTATCAAGCCATTTT<br>TGGCTAAGAAAGGTGGCTCTCCGGAAGACATCGAAGGGATGTACAACGCTTGGTTCAAGTCTGTAGT<br>TTTACAAGTTGCCATCTGGTCACACCCTTATACTAAGGAGAATGACTGGCTCGAGCACCACCACCAC<br>CACCCTGA |
| ApePgb<br>Y60G                             | ATGACTCCCTCGGACATCCCGGGATATGATTATGGGCGTGTGCGAGAAGTCACCCATCACGGACCTTG<br>AGTTTGACCTTCTGAAGAAGACTGTCATGTTAGGTGAAAAGGACGTAATGTACTTGAAAAAGGCGTG<br>TGACGTTCTGAAAGATCAAGTTGATGAGATCCTTGACTTGTGGGGTGGTTGGGTAGCATCAAATGAG<br>CATTGATTTATTACTTCTCCAATCCGGATACAGGAGAGCCTATTAAGGAATACCTGGAACGTGTAC<br>GCGCTCGCTTTGGAGCCTGGATTCTGGACACTACCTGCCGCGACTATAACCGTGAATGGTTAGACTA<br>CCAGTACGAAGTTGGGCTTCGTATCACCCTTCAAAGAAAGGGGTACAGACGGAGTACGCACCGTG<br>CCCCATATCCCACTTCGTTATCTTATCGCATTTATCTATCCTATCACCGCCACTATCAAGCCATTTT<br>TGGCTAAGAAAGGTGGCTCTCCGGAAGACATCGAAGGGATGTACAACGCTTGGTTCAAGTCTGTAGT<br>TTTACAAGTTGCCATCTGGTCACACCCTTATACTAAGGAGAATGACTGGCTCGAGCACCACCACCAC<br>CACCCTGA |
| ApePgb<br>W59A<br>Y60G                     | ATGACTCCCTCGGACATCCCGGGATATGATTATGGGCGTGTGCGAGAAGTCACCCATCACGGACCTTG<br>AGTTTGACCTTCTGAAGAAGACTGTCATGTTAGGTGAAAAGGACGTAATGTACTTGAAAAAGGCGTG<br>TGACGTTCTGAAAGATCAAGTTGATGAGATCCTTGACTTGGCGGGTGGTTGGGTAGCATCAAATGAG<br>CATTGATTTATTACTTCTCCAATCCGGATACAGGAGAGCCTATTAAGGAATACCTGGAACGTGTAC<br>GCGCTCGCTTTGGAGCCTGGATTCTGGACACTACCTGCCGCGACTATAACCGTGAATGGTTAGACTA<br>CCAGTACGAAGTTGGGCTTCGTATCACCCTTCAAAGAAAGGGGTACAGACGGAGTACGCACCGTG<br>CCCCATATCCCACTTCGTTATCTTATCGCATTTATCTATCCTATCACCGCCACTATCAAGCCATTTT<br>TGGCTAAGAAAGGTGGCTCTCCGGAAGACATCGAAGGGATGTACAACGCTTGGTTCAAGTCTGTAGT<br>TTTACAAGTTGCCATCTGGTCACACCCTTATACTAAGGAGAATGACTGGCTCGAGCACCACCACCAC<br>CACCCTGA |
| ApePgb<br>W59A<br>Y60G<br>F145W<br>("AGW") | ATGACTCCCTCGGACATCCCGGGATATGATTATGGGCGTGTGCGAGAAGTCACCCATCACGGACCTTG<br>AGTTTGACCTTCTGAAGAAGACTGTCATGTTAGGTGAAAAGGACGTAATGTACTTGAAAAAGGCGTG<br>TGACGTTCTGAAAGATCAAGTTGATGAGATCCTTGACTTGGCGGGTGGTTGGGTAGCATCAAATGAG<br>CATTGATTTATTACTTCTCCAATCCGGATACAGGAGAGCCTATTAAGGAATACCTGGAACGTGTAC<br>GCGCTCGCTTTGGAGCCTGGATTCTGGACACTACCTGCCGCGACTATAACCGTGAATGGTTAGACTA<br>CCAGTACGAAGTTGGGCTTCGTATCACCCTTCAAAGAAAGGGGTACAGACGGAGTACGCACCGTG<br>CCCCATATCCCACTTCGTTATCTTATCGCATGGATCTATCCTATCACCGCCACTATCAAGCCATTTT<br>TGGCTAAGAAAGGTGGCTCTCCGGAAGACATCGAAGGGATGTACAACGCTTGGTTCAAGTCTGTAGT<br>TTTACAAGTTGCCATCTGGTCACACCCTTATACTAAGGAGAATGACTGGCTCGAGCACCACCACCAC<br>CACCCTGA |
| RmaNOD<br>WT                               | ATGGCGCCGACCCGTGTCGGAACAGACCCGTCAGTTGGTACGTGCGTCTGTGCCTGCCTGCAGAAAC<br>ACTCAGTCGCTATTAGCGCCACGATGTATCGGCTGCTTTTCGAACGGTATCCCGAAACCGGGAGCTT<br>GTTTGAACCTCCTGAGAGACAGATACACAAGCTTGCCTCGGCCCTGTTGGCCACGCCCGTAGTATC<br>GACAACCCATCGGCGTTACAGGCGGCCATCCGCCGATGGTGCTTTCCACGCACGCGCAGGAGTGC<br>AGGCCGTCCATTATCCGCTGGTTTGGGAATGTTTGGAGACGCTATAAAAGAAGTCTGGGCCCGGA<br>TGCCACCGAGACCCCTCTGCAGGCGTGAAGGAAGCCTATGATTTTTTAGCTCATTACTGTCTACC<br>AAGGAAGCGCAAGTCTACGCTGTGTTAGCTGAACTCGAGCATCACCATCACCATCACTGA                                                                                                                                                                       |
| RmaNOD<br>Q52V                             | ATGGCGCCGACCCGTGTCGGAACAGACCCGTCAGTTGGTACGTGCGTCTGTGCCTGCCTGCAGAAAC<br>ACTCAGTCGCTATTAGCGCCACGATGTATCGGCTGCTTTTCGAACGGTATCCCGAAACCGGGAGCTT<br>GTTTGAACCTCCTGAGAGAGTTATACACAAGCTTGCCTCGGCCCTGTTGGCCACGCCCGTAGTATC<br>GACAACCCATCGGCGTTACAGGCGGCCATCCGCCGATGGTGCTTTCCACGCACGCGCAGGAGTGC<br>AGGCCGTCCATTATCCGCTGGTTTGGGAATGTTTGGAGACGCTATAAAAGAAGTCTGGGCCCGGA<br>AGGCCGTCCATTATCCGCTGGTTTGGGAATGTTTGGAGACGCTATAAAAGAAGTCTGGGCCCGGA                                                                                                                                                                                                                                       |

|          |                                                                                                                                                                                                                                                                                                                                                                                                                                                                                                                                                                                                                                                                                                                                                                                                                                                                                                                                                                                                                                                                                                                                                                                                                                                                                                                                                                                                                                                                                                                                                                                                                                                                                                                                                                                                                                                                                                                                                                                                                                                                                                                                                                                                                                                                                                                                                                                                                                                                                                                                                                                                                                                                                                                                                                                                                                                                                                                                                                                                                                                                                                                                                                                                                                                                                                                                                                                                                                                                                                                                |
|----------|--------------------------------------------------------------------------------------------------------------------------------------------------------------------------------------------------------------------------------------------------------------------------------------------------------------------------------------------------------------------------------------------------------------------------------------------------------------------------------------------------------------------------------------------------------------------------------------------------------------------------------------------------------------------------------------------------------------------------------------------------------------------------------------------------------------------------------------------------------------------------------------------------------------------------------------------------------------------------------------------------------------------------------------------------------------------------------------------------------------------------------------------------------------------------------------------------------------------------------------------------------------------------------------------------------------------------------------------------------------------------------------------------------------------------------------------------------------------------------------------------------------------------------------------------------------------------------------------------------------------------------------------------------------------------------------------------------------------------------------------------------------------------------------------------------------------------------------------------------------------------------------------------------------------------------------------------------------------------------------------------------------------------------------------------------------------------------------------------------------------------------------------------------------------------------------------------------------------------------------------------------------------------------------------------------------------------------------------------------------------------------------------------------------------------------------------------------------------------------------------------------------------------------------------------------------------------------------------------------------------------------------------------------------------------------------------------------------------------------------------------------------------------------------------------------------------------------------------------------------------------------------------------------------------------------------------------------------------------------------------------------------------------------------------------------------------------------------------------------------------------------------------------------------------------------------------------------------------------------------------------------------------------------------------------------------------------------------------------------------------------------------------------------------------------------------------------------------------------------------------------------------------------------|
|          | TGCCACCGAGACCCCTTCTGCAGGCGTGGAAAGGAAGCCTATGATTTTTTTAGCTCATTACTGTCTACC<br>AAGGAAGCGCAAGTCTACGCTGTGTTAGCTGAACTCGAGCACCACCACCACCACCCTGA                                                                                                                                                                                                                                                                                                                                                                                                                                                                                                                                                                                                                                                                                                                                                                                                                                                                                                                                                                                                                                                                                                                                                                                                                                                                                                                                                                                                                                                                                                                                                                                                                                                                                                                                                                                                                                                                                                                                                                                                                                                                                                                                                                                                                                                                                                                                                                                                                                                                                                                                                                                                                                                                                                                                                                                                                                                                                                                                                                                                                                                                                                                                                                                                                                                                                                                                                                                           |
| P411-CIS | ATGACAATTAAGAAAATGCCTCAGCCAAAAACGTTTGGAGAGCTTAAAAATTTACCGTTATTAACA<br>CAGATAAACCGGTTCAAGCTTTGATGAAAATTTGCGGATGAATTAGGAGAAATCTTTAAATTCGAGGC<br>GCCTGGTTCGTGTAACGCGCTACTTATCAAGTCAGCGTCTAATTAAGAAGCATGCGATGAATCACGC<br>TTTGATAAAAACTTAAGTCAAGCGCTGAAATTTGCACGTGATTTTGCAGGAGACGGGTTAGTCACAA<br>GCTGGACGCATGAAAAAATTTGAAAAAAGCGCATAATATCTTACTTCCAAGCTTTAGTCAGCAGGC<br>AATGAAAGGCTATCATGCGATGATGGTCGATATCGCCGTGCAGCTTGTTCAAAAGTGGGAGCGTCTA<br>AATGCAGATGAGCATATTGAAGTATCGGAAGACATGACACGTTTAAACGCTTGATACAATTTGGTCTTT<br>GCGGCTTTAACTATCGCTTTAAACAGCTTTTACCGAGATCAGCCTCATCCATTTATTATAAGTATGGT<br>CCGTGCACTGGATGAAGTAATGAACAAGCTGCAGCGAGCAAATCCAGACGACCAGCTTATGATGAA<br>AACAAAGCGCCAGTTTCAAGAAGATATCAAGTTGATGAACGACCTAGTAGATAAAAATTTATTCAGATC<br>GCAAAGCAAGGGGTGAACAAAGCGATGATTTATTAAACGCAGATGCTAAACGGAAAAAGATCCAGAAAC<br>GGGTGAGCCGCTTGATGACGGGAACATTCGCTATCAAATTTATTACATTCCTTAAATTCGCGGACAGAA<br>GCAACAAGTGGTCTTTTATCATTGCGCTGTATTTCTTAGTGAAAAATCCACATGTATTACAAAAAG<br>TAGCAGAAGAAGCAGCAGGATTTCTAGTAGATCCTGTTCCAAGCTACAAACAAGTCAAACAGCTTAA<br>ATATGTCGGCATGGTCTTAAACGAAGCGTGCCTTATGGCCAAGTGCCTCCTGCGTTTTCCCTATAT<br>GCAAAAGAAGATACGGTGCCTGGAGGAGAATATCCTTTAGAAAAAGGCGACGAAGTAATGGTCTCGA<br>TTCTCAGCTTACCCTGATAAAACAGTTTGGGGAGACGATGTGGAGGAGTCCCGTCCAGAGCGTTT<br>TGAAAATCCAAGTGCATTTCCGAGCATGCGTTTTAAACCGTTTGGAAACGGTCAGCGTGCCTTATC<br>GGTCAGCAGTTTCGCTCTTATGAAGCAACGCTGGTACTTGGTATGATGCTAAAACACTTTGACTTTG<br>AAGATCATACAAACACGAGCTCGATATTAAGAAAATTTAAACGTTAAAACCTAAAGGCTTTGTGGT<br>AAAAGCAAAATCGAAAAAATTTCCGCTTGGCGGTATTCCTTACCTAGCAGTGAACAGTCTGCTAAA<br>AAAGTACGCAAAAAGGCAGAAAACGCTCATAATACGCCGCTGCTTGTGCTATACGGTTCAAATATGG<br>GTACCGCTGAAGGAACGGCGCGTGAATTTAGCAGATATTGCAATGAGCAAAGGATTTGCACCGCAGGT<br>CGCAACGCTTGATTCACACGCCGGAAATCTTCCGCGCGAAGGAGCTGTATTAATTTGAACGGCGTCT<br>TATAACGGTCACTCCGCTGATAACGCAAAGCAATTTGTCGACTGGTTAGACCAAGCGTCTGCTGATG<br>AAGTAAAAGGCGTTTCGCTACTCCGATTTGGATGCGGCGATAAAAACTGGGCTACTACGTATCAAAA<br>AGTGCCTGCTTTTATCGATGAAACGCTTGCCTTAAAGGGGCAGAAAACATCGCTGACCGCGGTGAA<br>GCAGATGCAAGCGACGACTTTGAAGGCACATGAAAGAAATGGCGTGAACATATGTGGAGTGACGTAG<br>CAGCTACTTTAACTCGACATTTGAAAACAGTGAAGATAATAAATCTACTCTTTTCAATTTCAATTTGT<br>CGACAGTCCCGCGGATATGCCGCTTGGCGAAAATGCACGGTGCCTTTTCAACGAACGTCGTAGCAAGC<br>AAAGAATTTCAACAGCCAGGCAGTGCACGAAGCACGCGACATCTTGAATTTGAATTTCAAAAAGAAG<br>CTTCTTATCAAGAAGGAGATCATTTAGGTGTTATTTCTCGCAACTATGAAGGAATAGTAAACCGTGT<br>AACAGCAAGGTTTCGGCTTAGATGCATCACAGCAAATCCGCTTGGAAAGCAGAAGAAGAAAAATTAGCT<br>CATTTGCCACTCGCTAAAACAGTATCCGTAGAAGAGCTTCTGCAATACGTGGAGCTTCAAGATCCTG<br>TTACGCGCACGCAGCTTCGCGCAATGGCTGCTAAAACGGTCTGCCCCCGCATAAAGTAGAGCTTGA<br>AGCCTTGTGTTGAAAAGCAAGCTTACAAAGAACAAGTGTGGCAAAACGTTTAAACAATGCTTGAAGT<br>CTTGAAAAATACCCGGCGTGTGAAATGAAATTCAGCGAATTTATCGCCCTTCTGCCAAGCATAACGCC<br>CGCGCTATTACTCGATTTCTTTCATCACCTCGTGTGATGAAAAACAAGCAAGCATCACGGTCAGCGT<br>TGCTCAGGAGAAGCGTGGAGCGGATATGGAGAATATAAAGGAATTTGCGTCAACTATCTTGCCGAG<br>CTGCAAGAAGGAGATACGATTACGTGCTTTATTTCCACACCGCAGTCAGAATTTACGCTGCCAAAAG<br>ACCCTGAAACGCCGCTTATCATGGTTCGGACCGGGAACAGGCGTTCGCGCCGTTTAGAGGCTTTGTGCA<br>GGCGCGCAAACAGCTAAAAGAACAAGGACAGTCACTTGGAGAAGCACATTTATACTTCGGCTGCCGT<br>TCACCTCATGAAGACTATCTGTATCAAGAAGAGCTTGAACGCCCCAAAGCGAAGGCATCATTTACGC<br>TTCATACCGCTTTTTCTCGCATGCCAAATCAGCCGAAAACATACGTTTACGACGTAATGGAACAAGA<br>CGGCAAGAAATTTGATTGAATTTCTTGTATCAAGGAGCGCACTTCTATATTTGCGGAGACGGAAGCCAA<br>ATGGCACCTGCCGTTGAAGCAACGCTTATGAAAAGCTATGCTGACGTTACCAAGTGAGTGAAGCAG<br>ACGCTCGTTATGGCTGCAGCAGCTAGAAGAAAAAGCCGATACGCAAAAAGACGTTGTTGGCTGGGCT<br>CGAGCACCAACCACCACCCTGAGATCCGGCTGCTAACAAAGCCCGAA |
| P411-UA  | ATGACAATTAAGAAAATGCCTCAGCCAAAAACGTTTGGAGAGCTTAAAAATTTACCGTTATTAACA<br>CAGATAAACCGGTTCAAGCTTTGATGAAAATTTGCGGATGAATTAGGAGAAATCTTTAAATTCGAGGC<br>GCCTGGTTCGTGTAACGCGCTACTTATCAAGTCAGCGTCTAATTAAGAAGCATGCGATGAATCACGC<br>TTTGATAAAAACTTAAGTCAAGCGTATAAATTTGCACGTGATTTTGCAGGAGACGGGTTAGTGACAA<br>GCTGGACGCATGAAAAAATTTGAAAAAAGCGCATAATATCTTACTTCCAAGCTTTAGTCAGCAGGC<br>AATGAAAGGCTATCATGCGATGATGGTCGATATCGCCGTGCAGCTTGTTCAAAAGTGGGAGCGTCTA<br>AATGCAGATGAGCATATTGAAGTATCGGAAGACATGACACGTTTAAACGCTTGATACAATTTGGTCTTT                                                                                                                                                                                                                                                                                                                                                                                                                                                                                                                                                                                                                                                                                                                                                                                                                                                                                                                                                                                                                                                                                                                                                                                                                                                                                                                                                                                                                                                                                                                                                                                                                                                                                                                                                                                                                                                                                                                                                                                                                                                                                                                                                                                                                                                                                                                                                                                                                                                                                                                                                                                                                                                                                                                                                                                                                                                                                                                                                                                                                 |

|                          |                                                                                                                                                                                                                                                                                                                                                                                                                                                                                                                                                                                                                                                                                                                                                                                                                                                                                                                                                                                                                                                                                                                                                                                                                                                                                                                                                                                                                                                                                                                                                                                                                                                                                                                                                                                                                                                                                                                                                                                                                                                                                                                                                                                                                                                                                                                                                                                                                                                                                                                                                                                                                                                                                                                                                                                                                                                                                                                                                                                                                                                              |
|--------------------------|--------------------------------------------------------------------------------------------------------------------------------------------------------------------------------------------------------------------------------------------------------------------------------------------------------------------------------------------------------------------------------------------------------------------------------------------------------------------------------------------------------------------------------------------------------------------------------------------------------------------------------------------------------------------------------------------------------------------------------------------------------------------------------------------------------------------------------------------------------------------------------------------------------------------------------------------------------------------------------------------------------------------------------------------------------------------------------------------------------------------------------------------------------------------------------------------------------------------------------------------------------------------------------------------------------------------------------------------------------------------------------------------------------------------------------------------------------------------------------------------------------------------------------------------------------------------------------------------------------------------------------------------------------------------------------------------------------------------------------------------------------------------------------------------------------------------------------------------------------------------------------------------------------------------------------------------------------------------------------------------------------------------------------------------------------------------------------------------------------------------------------------------------------------------------------------------------------------------------------------------------------------------------------------------------------------------------------------------------------------------------------------------------------------------------------------------------------------------------------------------------------------------------------------------------------------------------------------------------------------------------------------------------------------------------------------------------------------------------------------------------------------------------------------------------------------------------------------------------------------------------------------------------------------------------------------------------------------------------------------------------------------------------------------------------------------|
|                          | <p>GCGGCTTTAACTATCGCTTTAACAGCTTTTACCGAGATCAGCCTCATCCATTTATTATAAGTATGGT<br/> CCGTGCAATTGATGAAGTAATGAACAAGCTGCAGCGAGCAAATCCAGACGACCCAGCTTATGATGAA<br/> AACAAGCGCCAGTTTCAAGAAGATATCAAGGTGATGAACGACCTAGTAGATAAAAATTATTGCAGATC<br/> GCAAAGCAAGGGGTGAACAAAGCGATGATTTATTAACGCAGATGCTAAACGGAAAAGATCCAGAAAC<br/> GGGTGAGCCGCTTGATGACGGGAACATTCGCTATCAAATTTATTACATTCCTAATTGCGGGACACGAA<br/> GCAACAAGTGGTCTTTTATCATTGCGCTGTATTTCTTAGTGAAAAATCCACATGTATTACAAAAAG<br/> TAGCAGAAGAAGCAGCAGGATTTCTAGTAGATCCTGTTCCAAGCTACAAACAAGTCAAACAGCTTAA<br/> ATATGTCGGCATGGTCTTAAACGAAGCGCTGCGCTTATGGCCAACCTGCTCCTGCGTTTTCCCTATAT<br/> GCAAAGAAGATACGGTGCTTGGAGGAGAATATCCTTTAGAAAAAGGCGACGAAGTAATGGTTCTGA<br/> TTCTCAGCTTACCCTGATAAAAACAGTTTGGGGAGACGATGTGGAGGAGTTCCTCCAGAGCGTTT<br/> TGAAAATCCAAGTGGATTCGCGCAGCATGCGTTTAAACCGTTTGGAAACGGTCAGCGTGCCTATC<br/> GGTCAGCATTCGCTTTCATGAAGCAACGCTGGTACTTGGTATGATGCTAAAACACTTTGACTTTG<br/> AAGATCATACAAACACGAGCTCGATATTAAGAAACTTTTCAGTTAAAACCTAAAGGCTTTGTGGT<br/> AAAAGCAAAATCGAAAAAAATTCGCTTGGCGGTATTCCTTACCTAGCACTGAACAGTCTGCTAAA<br/> AAAGTACGCAAAAAGGCAGAAAACGCTCATAATACGCCGCTGCTTGTGCTATACGGTTCAAATATGG<br/> GTACCGCTGAAGGAACGGCGCGTGATTTAGCAGATATTGCAATGAGCAAAGGATTTGCACCGCAGGT<br/> CGCAACGCTTGATTCACACGCCGGAATCTTCCGCGCGAAGGAGCTGTATTAATTGTAACGGCGTCT<br/> TATAACGGTCATCCGCTGATAACGCAAAGCAATTTGTCGACTGGTTAGACCAAGCGTCTGCTGATG<br/> AAGTAAAAGGCGTTCGCTACTCCGTATTTGGATGCGCGGATAAAAACCTGGGCTACTACGTATCAAAA<br/> AGTGCCTGCTTTTATCGATGAAACGCTTGCCGCTAAAGGGGCAGAAAACATCGCTGACCGCGGTGAA<br/> GCAGATGCAAGCGACGACTTTGAAGGCACATATGAAGAATGGCGTGAACATATGTGGAGTGACGTAG<br/> CAGCCTACTTTAACCCTCGACATTGAAAACAGTGAAGATAATAAATCTACTCTTTCACCTCAATTTGT<br/> CGACAGCGCCGCGGATATGCCGCTTGCGAAAATGCACGGTGCCTTTTCAACGAACGCTCGTAGCAAGC<br/> AAAGAACTTCAACAGCCAGGCAGTGCACGAAGCAGCGACATCTTGAATTTGAACCTCCAAAAGAAG<br/> CTTCTTATCAAGAAGGAGATCATTTAGGTGTTATTCCTCGCAACTATGAAGGAATAGTAAACCGTGT<br/> AACAGCAAGGTTTCGGCCTAGATGCATCACAGCAAATCCGCTTGGAAAGCAGAAGAAGAAAAATTAGCT<br/> CATTTGCCACTCGCTAAAACAGTATCCGTAGAAGAGCTTCTGCAATACGTGGAGCTTCAAGATCCTG<br/> TTACGCGCACGCAGCTTCGCGCAATGGCTGCTAAAACGGTCTGCCCGCCGATAAAGTAGAGCTTGA<br/> AGCCTTGCTTGAAAAGCAAGCTTACAAAGAACAAGTGCCTGGCAAAAACGTTTAAACAATGCTTGAAC<br/> CTTGAAAATACCCGGCGTGTGAAATGAAATTCAGCGAATTTATCGCCCTTCTGCCAACGATACGCC<br/> CGCGCTATTACTCGATTTCTTTCATCACCTCGTGTGATGAAAAACAAGCAAGCTCACGGTCAGCGT<br/> TGCTCAGGAGAAGCGTGGAGCGGATATGGAGAATATAAAGGAATTCGCTCGAATCTTGGCCGAG<br/> CTGCAAGAAGGAGATACGATTACGTGCTTTATTTCCACACCGCAGTCAGAATTTACGCTGCCAAAAG<br/> ACCCTGAAACGCCGCTTATCATGGTCCGACCGGGAACAGGCGTCGCGCCGTTTAGAGGCTTTGTGCA<br/> GGCGCGCAAACAGCTAAAAGAACAAGGACAGTCACTTGGAGAAGCACATTTATACTTCGGCTGCCGT<br/> TCACCTCATGAAGACTATCTGTATCAAGAAGAGCTTGAACGCCCCAAAGCGAAGGCATCATACGC<br/> TTCATACCGCTTTTTCTCGCATGCCAAATCAGCCGAAAACATACGTTTACGACGTAATGGAACAAGA<br/> CGGCAAGAAATTGATTGAACCTTCTTGTATCAAGGAGCGCACTTCTATATTTGCGGAGACGGAAGCCAA<br/> ATGGCACCTGCCGTTGAAGCAACGCTTATGAAAAGCTATGCTGACGTTTACCAAGTGAGTGAAGCAG<br/> ACGCTCGCTTATGGCTGCAGCAGCTAGAAGAAAAAGGCCGATACGCAAAAAGACGTGTGGGCTGGGCT<br/> CGAGCACCACCACCACCACCCTGA</p> |
| <p>P411-<br/>UA-V87C</p> | <p>ATGACAATTAAGAAATGCCTCAGCCAAAACGTTTGGAGAGCTTAAAAATTTACCGTTATTAACA<br/> CAGATAAACCGGTTCAAGCTTTGATGAAAATTCGGGATGAATTAGGAGAAATCTTTAAATTCGAGGC<br/> GCCTGGTTCGTGTAACGCGCTACTTATCAAGTCAGCGTCTAATTAAGAAGCATGCGATGAATCACGC<br/> TTTGATAAAAACCTAAGTCAAGCGTATAAATTTGCACGTGATTTTGCAGGAGACGGGTTATGTACAA<br/> GCTGGACGCATGAAAAAAATTTGAAAAAAGCGCATAATATCTTACTTCCAAGCTTTAGTCAGCAGGC<br/> AATGAAAGGCTATCATGCGATGATGGTCGATATCGCCGTGCAGCTTGTTCAAAAGTGGGAGCGTCTA<br/> AATGCAGATGAGCATATTTGAAGTATCGGAAGACATGACACGTTTAAACGCTTGATAACAATTTGGTCTTT<br/> CGCGCTTTAACTATCGCTTTAACAGCTTTTACCGAGATCAGCCTCATCCATTTATTATAAGTATGGT<br/> CCGTGCAATTGATGAAGTAATGAACAAGCTGCAGCGAGCAAATCCAGACGACCCAGCTTATGATGAA<br/> AACAAGCGCCAGTTTCAAGAAGATATCAAGGTGATGAACGACCTAGTAGATAAAAATTATTGCAGATC<br/> GCAAAGCAAGGGGTGAACAAAGCGATGATTTATTAACGCAGATGCTAAACGGAAAAGATCCAGAAAC<br/> GGGTGAGCCGCTTGATGACGGGAACATTCGCTATCAAATTTATTACATTCCTAATTGCGGGACACGAA<br/> GCAACAAGTGGTCTTTTATCATTGCGCTGTATTTCTTAGTGAAAAATCCACATGTATTACAAAAAG<br/> TAGCAGAAGAAGCAGCAGGATTTCTAGTAGATCCTGTTCCAAGCTACAAACAAGTCAAACAGCTTAA<br/> ATATGTCGGCATGGTCTTAAACGAAGCGCTGCGCTTATGGCCAACCTGCTCCTGCGTTTTCCCTATAT<br/> GCAAAGAAGATACGGTGCTTGGAGGAGAATATCCTTTAGAAAAAGGCGACGAAGTAATGGTTCTGA</p>                                                                                                                                                                                                                                                                                                                                                                                                                                                                                                                                                                                                                                                                                                                                                                                                                                                                                                                                                                                                                                                                                                                                                                                                                                                                                                                                                                                                                                                                                                                                                                                                                                                                                                                                                                                                                                          |

|                          |                                                                                                                                                                                                                                                                                                                                                                                                                                                                                                                                                                                                                                                                                                                                                                                                                                                                                                                                                                                                                                                                                                                                                                                                                                                                                                                                                                                                                                                                                                                                                                                                                                                                                                                                                                                                                                                                                                                                                                                                                                                                                                                                                                                                                                                                                                                                                                             |
|--------------------------|-----------------------------------------------------------------------------------------------------------------------------------------------------------------------------------------------------------------------------------------------------------------------------------------------------------------------------------------------------------------------------------------------------------------------------------------------------------------------------------------------------------------------------------------------------------------------------------------------------------------------------------------------------------------------------------------------------------------------------------------------------------------------------------------------------------------------------------------------------------------------------------------------------------------------------------------------------------------------------------------------------------------------------------------------------------------------------------------------------------------------------------------------------------------------------------------------------------------------------------------------------------------------------------------------------------------------------------------------------------------------------------------------------------------------------------------------------------------------------------------------------------------------------------------------------------------------------------------------------------------------------------------------------------------------------------------------------------------------------------------------------------------------------------------------------------------------------------------------------------------------------------------------------------------------------------------------------------------------------------------------------------------------------------------------------------------------------------------------------------------------------------------------------------------------------------------------------------------------------------------------------------------------------------------------------------------------------------------------------------------------------|
|                          | <p>TTCTCAGCTTCACCGTGATAAAACAGTTTGGGGAGACGATGTGGAGGAGTTCCTGCCAGAGCGTTT<br/> TGAAAATCCAAGTGCATTCGCGAGCATGCGTTTAAACCGTTTGGAAACGGTCAGCGTGCCTATC<br/> GGTCAGCAGTTTCGCTCTTCATGAAGCAACGCTGGTACTTGGTATGATGCTAAAACACTTTGACTTTG<br/> AAGATCATACAAACCTACGAGCTCGATATTAAGAAACTTTTCAGTTAAAACCTAAAGGCTTTGTGGT<br/> AAAAGCAAAATCGAAAAAAATTCGCGTTGGCGGTATTCCTTCACCTAGCACTGAACAGTCTGCTAAA<br/> AAAGTACGCAAAAAGGCAGAAAACGCTCATAATACGCCGCTGCTTGTGCTATACGGTTCAAATATGG<br/> GTACCGCTGAAGGAACGGCGCGTGATTTAGCAGATATTGCAATGAGCAAAGGATTTGCACCGCAGGT<br/> CGCAACGCTTGATTCACACGCCGGAATCTTCGCGCGAAGGAGCTGTATTAATTGTAACGGCGTCT<br/> TATAACGGTTCATCCGCCTGATAACGCAAAGCAATTTGTCGACTGGTTAGACCAAGCGTCTGCTGATG<br/> AAGTAAAAGGCGTTCGCTACTCCGATTTGGATGCGGCGATAAAAACTGGGCTACTACGTATCAAAA<br/> AGTGCCTGCTTTTATCGATGAAACGCTTGCCGCTAAAGGGGCAGAAAACATCGCTGACCGCGGTGAA<br/> GCAGATGCAAGCGACGACTTTGAAGGCACATATGAAGAATGGCGTGAACATATGTGGAGTACGTAG<br/> CAGCCTACTTTAACCTCGACATTGAAAACAGTGAAGATAATAAATCTACTCTTTTCACTCAATTTGT<br/> CGACAGCGCCGCGGATATGCCGCTTGCGAAAATGCACGGTGCCTTTTCAACGAACGTCGTAGCAAGC<br/> AAAGAACTTCAACAGCCAGGCAGTGCACGAAGCACGCGACATCTTGAAATTGAACTTCCAAAAGAAG<br/> CTTCTTATCAAGAAGGAGATCATTTAGGTGTTATTCCTCGCAACTATGAAGGAATAGTAAACCGTGT<br/> AACAGCAAGGTTTCGGCCTAGATGCATCACAGCAAATCCGCTCTGGAAGCAGAAGAAGAAAAATTAGCT<br/> CATTTGCCACTCGCTAAAACAGTATCCGTAGAAGAGCTTCTGCAATACGTGGAGCTTCAAGATCCTG<br/> TTACGCGCACGCAGCTTCGCGCAATGGCTGCTAAAACGGTCTGCCCGCCGCATAAAGTAGAGCTTGA<br/> AGCCTTGCTTGAAAAGCAAGCCTACAAAGAACAAGTGTGGCAAAACGTTTAAACAATGCTTGAAGT<br/> CTTGAAAAATACCCGGCGTGTGAAATGAAATTCAGCGAATTTATCGCCCTTCTGCCAAGCATAACGCC<br/> CGCGCTATTACTCGATTTCTTCATCACCTCGTGTGATGAAAAACAAGCAAGCATCACGGTCAGCGT<br/> TGCTCAGGAGAAGCGTGGAGCGGATATGGAGAATATAAAGGAATTCGCTCGAATATCTTGCCGAG<br/> CTGCAAGAAGGAGATACGATTACGTGCTTTATTTCCACACCCGAGTCAAGATTTACGCTGCCAAAAG<br/> ACCCTGAAACGCCGCTTATCATGGTCCGACCGGGAACAGGCGTCCGCGCCGTTTAGAGGCTTTGTGCA<br/> GGCGCGCAAACAGCTAAAAGAACAAGGACAGTCACTTGGAGAAGCACATTTATACTTCGGCTGCCGT<br/> TCACCTCATGAAGACTATCTGTATCAAGAAGAGCTTGAAAACGCCCAAAGCGAAGGCATCATACGC<br/> TTCATACCGCTTTTTCTCGCATGCCAAATCAGCCGAAAACATACGTTTCAAGCAGTAAATGGAACAAGA<br/> CGGCAAGAAATGATTGAACCTTCTTGATCAAGGAGCGCACTTCTATATTTGCGGAGACGGAAGCCAA<br/> ATGGCACCTGCCGTTGAAGCAACGCTTATGAAAAGCTATGCTGACGTTTACCAAGTGAAGCAG<br/> ACGCTCGCTTATGGCTGCAGCAGCTAGAAGAAAAAGGCCGATACGCAAAAAGACGTGTGGCTGGGCT<br/> CGAGCACCACCACCACCACTGA</p> |
| <p>P411-<br/>UA-V87F</p> | <p>ATGACAATTAAGAAATGCCTCAGCCAAAACGTTTGGAGAGCTTAAAAATTTACCGTTATTAACA<br/> CAGATAAACCGGTTCAAGCTTTGATGAAAATTCGCGATGAATTAGGAGAAATCTTTAAATTCGAGGC<br/> GCCTGGTTCGTGTAACGCGCTACTTATCAAGTCAGCGTCTAATTAAGAAGCATGCGATGAATCACGC<br/> TTTGATAAAAACCTTAAGTCAAGCGTATAAATTTGCACGTGATTTTGCAGGAGACGGGTTATTTACAA<br/> GCTGGACGCATGAAAAAAATTTGAAAAAAGCGCATAATATCTTACTTCCAAGCTTTAGTCAGCAGGC<br/> AATGAAAGGCTATCATGCGATGATGGTCGATATCGCCGTGCAGCTTGTTCAAAAGTGGGAGCGTCTA<br/> AATGCAGATGAGCATATTGAAGTATCGGAAGACATGACACGTTTAAACGCTTGATACAATTTGGTCTTT<br/> GCGGCTTTAACTATCGCTTTAAACAGCTTTTACCGAGATCAGCCTCATCCATTTATTTATAAGTATGGT<br/> CCGTGCAATTTGATGAAGTAATGAACAAGCTGCAGCGAGCAAATCCAGACGACCCAGCTTATGATGAA<br/> AACAAGCGCCAGTTTCAAGAAGATATCAAGGTGATGAACGACCTAGTAGATAAAAATTTATGCAGATC<br/> GCAAAGCAAGGGGTGAACAAAGCGATGATTTATTAACGCAGATGCTAAACGGAAAAGATCCAGAAAC<br/> GGGTGAGCCGCTTGATGACGGGAACATTCGCTATCAAATTTATACATTTCTAATTTGCGGGACACGAA<br/> GCAACAAGTGGTCTTTTATCATTTTGCCTGTATTTCTTAGTGAAAAATCCACATGTATTACAAAAG<br/> TAGCAGAAGAAGCAGCACGAGTTCTAGTAGATCCTGTTCCAAGCTACAAACAAGTCAAACAGCTTAA<br/> ATATGTCGGCATGGTCTTAAACGAAGCGCTGCGCTTATGGCCAACTGCTCCTGCGTTTCCCTATAT<br/> GCAAAAAGAAGATACGGTGTCTTGGAGGAGAATATCCTTTAGAAAAAGGCGAGCAAGTAATGGTCTGA<br/> TTCTCAGCTTCACCGTGATAAAACAGTTTGGGGAGACGATGTGGAGGAGTTCGCTTACAGAGCGTTT<br/> TGAAAATCCAAGTGCATTCGCGAGCATGCGTTTAAACCGTTTGGAAACGGTCAGCGTGCCTATC<br/> GGTCAGCAGTTTCGCTCTTCATGAAGCAACGCTGGTACTTGGTATGATGCTAAAACACTTTGACTTTG<br/> AAGATCATACAAACCTACGAGCTCGATATTAAGAAACTTTTCAGTTAAAACCTAAAGGCTTTGTGGT<br/> AAAAGCAAAATCGAAAAAAATTCGCGTTGGCGGTATTCCTTCACCTAGCACTGAACAGTCTGCTAAA<br/> AAAGTACGCAAAAAGGCAGAAAACGCTCATAATACGCCGCTGCTTGTGCTATACGGTTCAAATATGG<br/> GTACCGCTGAAGGAACGGCGCGTGATTTAGCAGATATTGCAATGAGCAAAGGATTTGCACCGCAGGT<br/> CGCAACGCTTGATTCACACGCCGGAATCTTCGCGCGAAGGAGCTGTATTAATTGTAACGGCGTCT<br/> TATAACGGTTCATCCGCCTGATAACGCAAAGCAATTTGTCGACTGGTTAGACCAAGCGTCTGCTGATG</p>                                                                                                                                                                                                                                                                                                                                                                                                                                                                         |



|  |                                                                                                                                                                                                                                                                                                                                                                                                                                                                                                                                                                                                                                                                                                                                                                                                                                                                                                                                                                                                                                                                                                                                                                                                                                                                                                                                                                                                                                                                                                                                                                                                                                                                                                           |
|--|-----------------------------------------------------------------------------------------------------------------------------------------------------------------------------------------------------------------------------------------------------------------------------------------------------------------------------------------------------------------------------------------------------------------------------------------------------------------------------------------------------------------------------------------------------------------------------------------------------------------------------------------------------------------------------------------------------------------------------------------------------------------------------------------------------------------------------------------------------------------------------------------------------------------------------------------------------------------------------------------------------------------------------------------------------------------------------------------------------------------------------------------------------------------------------------------------------------------------------------------------------------------------------------------------------------------------------------------------------------------------------------------------------------------------------------------------------------------------------------------------------------------------------------------------------------------------------------------------------------------------------------------------------------------------------------------------------------|
|  | <p>AAGTAAAAGGCGTTCGCTACTCCGTATTTGGATGCGGCGATAAAAACTGGGCTACTACGTATCAAAA<br/> AGTGCCTGCTTTTATCGATGAAACGCTTGCCGCTAAAGGGGCAGAAAACATCGCTGACCGCGGTGAA<br/> GCAGATGCAAGCGACGACTTTGAAGGCACATATGAAGAATGGCGTGAACATATGTGGAGTGACGTAG<br/> CAGCCTACTTTAACCCTCGACATTGAAAACAGTGAAGATAATAAATCTACTCTTTCACTTCAATTTGT<br/> CGACAGCGCCGCGGATATGCCGCTTGCAGAAAATGCACGGTGCCTTTTCAACGAACGTCGTAGCAAGC<br/> AAAGAACTTCAACAGCCAGGCAGTGCACGAAGCACGCGACATCTTGAATTTGAACCTCCAAAAGAAG<br/> CTTCTTATCAAGAAGGAGATCATTTAGGTGTTATTCCTCGCAACTATGAAGGAATAGTAAACCGTGT<br/> AACAGCAAGGTTTCGGCCTAGATGCATCACAGCAAATCCGCTCTGGAAGCAGAAGAAGAAAAATTAGCT<br/> CATTTGCCACTCGCTAAAACAGTATCCGTAGAAGAGCTTCTGCAATACGTGGAGCTTCAAGATCCTG<br/> TTACGCGCACGCAGCTTCGCGCAATGGCTGCTAAAACGGTCTGCCCGCCGCATAAAGTAGAGCTTGA<br/> AGCCTTGCTTGAAAAGCAAGCCTACAAAAGAACAAGTGCCTGGCAAAAACGTTTAAACAATGCTTGAATG<br/> CTTGAAAAATACCCGGCGTGTGAAATGAAATTCAGCGAATTTATCGCCCTTCTGCCAAGCATAACGCC<br/> CGCGCTATTACTCGATTTCTTATCACCTCGTGTGATGAAAAACAAGCAAGCATCACGGTCAGCGT<br/> TGCTCAGGAGAAGCGTGGAGCGGATATGGAGAATATAAAGGAATTGCGTCAACTATCTTGCCGAG<br/> CTGCAAGAAGGAGATACGATTACGTGCTTTATTTCCACACCCGAGTCAGAATTTACGCTGCCAAAAG<br/> ACCCTGAAACGCCGCTTATCATGGTCGGACCGGGAACAGGCGTCGCGCCGTTTAGAGGCTTTGTGCA<br/> GGCGCGCAAACAGCTAAAAGAACAAGGACAGTCACTTGGAGAAGCACATTTATACTTCGGCTGCCGT<br/> TCACCTCATGAAGACTATCTGTATCAAGAAGAGCTTGAACGCCCCAAAGCGAAGGCATCATTTACGC<br/> TTCATACCGCTTTTTCTCGCATGCCAAATCAGCCGAAAACATAACGTTTACGACGTAATGGAACAAGA<br/> CGGCAAGAAATTGATTGAACTTCTTGATCAAGGAGCGCACTTCTATATTTGCGGAGACGGAAGCCAA<br/> ATGGCACCTGCCGTTGAAGCAACGCTTATGAAAAGCTATGCTGACGTTTACCAAGTGAGTGAAGCAG<br/> ACGCTCGCTTATGGCTGCAGCAGCTAGAAGAAAAAGCCGATACGCAAAAAGACGTGTGGGCTGGGCT<br/> CGAGCACCACCACCACCACCTGA</p> |
|--|-----------------------------------------------------------------------------------------------------------------------------------------------------------------------------------------------------------------------------------------------------------------------------------------------------------------------------------------------------------------------------------------------------------------------------------------------------------------------------------------------------------------------------------------------------------------------------------------------------------------------------------------------------------------------------------------------------------------------------------------------------------------------------------------------------------------------------------------------------------------------------------------------------------------------------------------------------------------------------------------------------------------------------------------------------------------------------------------------------------------------------------------------------------------------------------------------------------------------------------------------------------------------------------------------------------------------------------------------------------------------------------------------------------------------------------------------------------------------------------------------------------------------------------------------------------------------------------------------------------------------------------------------------------------------------------------------------------|

**Supplemental Table 13.** Amino acid sequences of reported biocatalysts. These sequences are also available as a supplemental csv file.

| Protein                                    | Amino acid sequence                                                                                                                                                                                                                                                                      |
|--------------------------------------------|------------------------------------------------------------------------------------------------------------------------------------------------------------------------------------------------------------------------------------------------------------------------------------------|
| ApePgb<br>WT                               | MTPSDIPGYDYGRVEKSPITDLEFDLLKKTVMLEKDVMYLKKACDVLKDQVDEILDLYGWVASNE<br>HLIYYFSNPDTGEPIDKEYLERVRARFGAWILDTTCDYDYNREWLQYQYEVGLRHHRSKKGVTGQVTV<br>PHIPLRYLIAFIYPITATIKPFLAKKGGSPEDIEGMYNAWFKSVVLQVAIWSHPYTKENDWLEHHHH<br>HH*                                                                  |
| ApePgb<br>Y60G                             | MTPSDIPGYDYGRVEKSPITDLEFDLLKKTVMLEKDVMYLKKACDVLKDQVDEILDLYGWVASNE<br>HLIYYFSNPDTGEPIDKEYLERVRARFGAWILDTTCDYDYNREWLQYQYEVGLRHHRSKKGVTGQVTV<br>PHIPLRYLIAFIYPITATIKPFLAKKGGSPEDIEGMYNAWFKSVVLQVAIWSHPYTKENDWLEHHHH<br>HH*                                                                  |
| ApePgb<br>W59A<br>Y60G                     | MTPSDIPGYDYGRVEKSPITDLEFDLLKKTVMLEKDVMYLKKACDVLKDQVDEILDLAGGWVASNE<br>HLIYYFSNPDTGEPIDKEYLERVRARFGAWILDTTCDYDYNREWLQYQYEVGLRHHRSKKGVTGQVTV<br>PHIPLRYLIAFIYPITATIKPFLAKKGGSPEDIEGMYNAWFKSVVLQVAIWSHPYTKENDWLEHHHH<br>HH*                                                                 |
| ApePgb<br>W59A<br>Y60G<br>F145W<br>("AGW") | MTPSDIPGYDYGRVEKSPITDLEFDLLKKTVMLEKDVMYLKKACDVLKDQVDEILDLAGGWVASNE<br>HLIYYFSNPDTGEPIDKEYLERVRARFGAWILDTTCDYDYNREWLQYQYEVGLRHHRSKKGVTGQVTV<br>PHIPLRYLIAFIYPITATIKPFLAKKGGSPEDIEGMYNAWFKSVVLQVAIWSHPYTKENDWLEHHHH<br>HH*                                                                 |
| RmaNOD<br>WT                               | MAPTLSEQTRQLVRASVPALQKHSVAISATMYRLLFERYPETRSLFELPERQIHKLASALLAYARSI<br>DNPSALQAAIRRMVLSHARAGVQAVHYPLVWECLRDIAIKEVLGPDATETLLQAWKEAYDFLAHLLST<br>KEAQVYAVLAELEHHHHHH*                                                                                                                      |
| RmaNOD<br>Q52V                             | MAPTLSEQTRQLVRASVPALQKHSVAISATMYRLLFERYPETRSLFELPERVIHKLASALLAYARSI<br>DNPSALQAAIRRMVLSHARAGVQAVHYPLVWECLRDIAIKEVLGPDATETLLQAWKEAYDFLAHLLST<br>KEAQVYAVLAELEHHHHHH*                                                                                                                      |
| P411-CIS                                   | MTIKEMPQPKTFGELKNLPLLNNDKPVQALMKIADDELGEIFKFEAPGRVTRYLSSQRLIKEACDES<br>RFDKNLSQALKFARDFAGDGLVTSWTHEKNWKAHNILLPSFSQAMKGYHAMMVDIAVQLVQKWERL<br>NADEHIEVSEDMTRLTLDITGLCGFNRYRNFNSFYRDQPHFIIISMVRALDEVMNKLQRANPDDPAYDE<br>NKRQFQEDIKVMNDLVDKIIADRKARGEQSDLLTQMLNGKDPETGEPLDDGNIRYQIITFLIAGHE |

|                          |                                                                                                                                                                                                                                                                                                                                                                                                                                                                                                                                                                                                                                                                                                                                                                                                                                                                                                                                                                                                                                                                                                                                                                                                        |
|--------------------------|--------------------------------------------------------------------------------------------------------------------------------------------------------------------------------------------------------------------------------------------------------------------------------------------------------------------------------------------------------------------------------------------------------------------------------------------------------------------------------------------------------------------------------------------------------------------------------------------------------------------------------------------------------------------------------------------------------------------------------------------------------------------------------------------------------------------------------------------------------------------------------------------------------------------------------------------------------------------------------------------------------------------------------------------------------------------------------------------------------------------------------------------------------------------------------------------------------|
|                          | <p>ATSGLLSFALYFLVKNPHVLQKVAEEAARVLVDPVPSYKQVKQLKYVGMVLNEALRLWPTAPAFSLY<br/> AKEDTVLGGEYPLEKGDEVMVLI PQLHRDKTVWGDDVEEFRPERFENPSAIPQHAFKPFNGQRASI<br/> GQQFALHEATLVLGMLLKHDFDFEDHTNYELDIKETTLTKPKGFVVKAKSKKIPLGGIPSPSTEQSAK<br/> KVRKKAENAHNTPLLVLYGSNMGTAEGTARLDADIAMSKGFAPQVATLDSHAGNLPREGAVLIVTAS<br/> YNGHPPDNAKQFVDWLDQASADEVKGVRYSVFGCGDKNWATTYQKVPAFI DETLAAKGAENIADRGE<br/> ADASDDFEGTYEEWREHMWSDVAAYFNLDIENSEDNKSTLSLQFVDSAADMPLAKMHGAFSTNVVAS<br/> KELQQPGSARSTRHLEIELPKEASYQEGDHLGVI PRNYEGIVNRVTARFGLDASQQIRLEAEEEEKLA<br/> HLPLAKTVSVEELLQYVELQDPVTRTQLRAMAAKTVCPPHKVELEALLEKQAYKEQVLAKRLTMLEL<br/> LEKYPACEMKFSEFIALLPSIRPRYYSISSSPRVDEKQASITVSVVSGEAWSGYGEYKGIASNYLAE<br/> LQEGDTITCFISTPQSEFTLPKDPETPLIMVPGTGVAPFRGFVQARKQLKEQQGSLGEAHLFYGCR<br/> SPHEDYLYQEELENAQSEGIITLHTAFSRMPNQPKTYVQHVMEQDGKKLIELLDQGAHFYICGDGSQ<br/> MAPAVEATLMKSYADVHQVSEADARLWLQQLLEEKGRYAKDVWAGLEHHHHHHH*</p>                                                                                                                                                                                                                                                                                                   |
| <p>P411-UA</p>           | <p>MTIKEMPQPKTFGELKNLPLLNTDKPVQALMKIADELGEIFKFEAPGRVTRYLSSQRLIKEACDES<br/> FDKNLSQAYKFARDFAGDGLVTSWTHEKNWKAHNILLPSFSQQAMKGYHAMMVDIAVQLVQKWERL<br/> NADEHIEVSEDMTRLTLDTIGLCGFNYRFNSFYRDQPHFPIISMVRAIDEVMNKLQRANPDDPAYDE<br/> NKRQFQEDIKVMNDLVDKI IADRKARGEQSDLLTQMLNGKDPETGEPLDDGNIRYQIITFLIAGHE<br/> ATSGLLSFALYFLVKNPHVLQKVAEEAARVLVDPVPSYKQVKQLKYVGMVLNEALRLWPTAPAFSLY<br/> AKEDTVLGGEYPLEKGDEVMVLI PQLHRDKTVWGDDVEEFRPERFENPSAIPQHAFKPFNGQRASI<br/> GQQFALHEATLVLGMLLKHDFDFEDHTNYELDIKETFQLKPKGFVVKAKSKKIPLGGIPSPSTEQSAK<br/> KVRKKAENAHNTPLLVLYGSNMGTAEGTARLDADIAMSKGFAPQVATLDSHAGNLPREGAVLIVTAS<br/> YNGHPPDNAKQFVDWLDQASADEVKGVRYSVFGCGDKNWATTYQKVPAFI DETLAAKGAENIADRGE<br/> ADASDDFEGTYEEWREHMWSDVAAYFNLDIENSEDNKSTLSLQFVDSAADMPLAKMHGAFSTNVVAS<br/> KELQQPGSARSTRHLEIELPKEASYQEGDHLGVI PRNYEGIVNRVTARFGLDASQQIRLEAEEEEKLA<br/> HLPLAKTVSVEELLQYVELQDPVTRTQLRAMAAKTVCPPHKVELEALLEKQAYKEQVLAKRLTMLEL<br/> LEKYPACEMKFSEFIALLPSIRPRYYSISSSPRVDEKQASITVSVVSGEAWSGYGEYKGIASNYLAE<br/> LQEGDTITCFISTPQSEFTLPKDPETPLIMVPGTGVAPFRGFVQARKQLKEQQGSLGEAHLFYGCR<br/> SPHEDYLYQEELENAQSEGIITLHTAFSRMPNQPKTYVQHVMEQDGKKLIELLDQGAHFYICGDGSQ<br/> MAPAVEATLMKSYADVHQVSEADARLWLQQLLEEKGRYAKDVWAGLEHHHHHHH*</p> |
| <p>P411-<br/>UA-V87C</p> | <p>MTIKEMPQPKTFGELKNLPLLNTDKPVQALMKIADELGEIFKFEAPGRVTRYLSSQRLIKEACDES<br/> FDKNLSQAYKFARDFAGDGLCTSWTHEKNWKAHNILLPSFSQQAMKGYHAMMVDIAVQLVQKWERL<br/> NADEHIEVSEDMTRLTLDTIGLCGFNYRFNSFYRDQPHFPIISMVRAIDEVMNKLQRANPDDPAYDE<br/> NKRQFQEDIKVMNDLVDKI IADRKARGEQSDLLTQMLNGKDPETGEPLDDGNIRYQIITFLIAGHE<br/> ATSGLLSFALYFLVKNPHVLQKVAEEAARVLVDPVPSYKQVKQLKYVGMVLNEALRLWPTAPAFSLY<br/> AKEDTVLGGEYPLEKGDEVMVLI PQLHRDKTVWGDDVEEFRPERFENPSAIPQHAFKPFNGQRASI<br/> GQQFALHEATLVLGMLLKHDFDFEDHTNYELDIKETFQLKPKGFVVKAKSKKIPLGGIPSPSTEQSAK<br/> KVRKKAENAHNTPLLVLYGSNMGTAEGTARLDADIAMSKGFAPQVATLDSHAGNLPREGAVLIVTAS<br/> YNGHPPDNAKQFVDWLDQASADEVKGVRYSVFGCGDKNWATTYQKVPAFI DETLAAKGAENIADRGE<br/> ADASDDFEGTYEEWREHMWSDVAAYFNLDIENSEDNKSTLSLQFVDSAADMPLAKMHGAFSTNVVAS<br/> KELQQPGSARSTRHLEIELPKEASYQEGDHLGVI PRNYEGIVNRVTARFGLDASQQIRLEAEEEEKLA<br/> HLPLAKTVSVEELLQYVELQDPVTRTQLRAMAAKTVCPPHKVELEALLEKQAYKEQVLAKRLTMLEL<br/> LEKYPACEMKFSEFIALLPSIRPRYYSISSSPRVDEKQASITVSVVSGEAWSGYGEYKGIASNYLAE<br/> LQEGDTITCFISTPQSEFTLPKDPETPLIMVPGTGVAPFRGFVQARKQLKEQQGSLGEAHLFYGCR<br/> SPHEDYLYQEELENAQSEGIITLHTAFSRMPNQPKTYVQHVMEQDGKKLIELLDQGAHFYICGDGSQ<br/> MAPAVEATLMKSYADVHQVSEADARLWLQQLLEEKGRYAKDVWAGLEHHHHHHH*</p> |
| <p>P411-<br/>UA-V87F</p> | <p>MTIKEMPQPKTFGELKNLPLLNTDKPVQALMKIADELGEIFKFEAPGRVTRYLSSQRLIKEACDES<br/> FDKNLSQAYKFARDFAGDGLFTSWTHEKNWKAHNILLPSFSQQAMKGYHAMMVDIAVQLVQKWERL<br/> NADEHIEVSEDMTRLTLDTIGLCGFNYRFNSFYRDQPHFPIISMVRAIDEVMNKLQRANPDDPAYDE<br/> NKRQFQEDIKVMNDLVDKI IADRKARGEQSDLLTQMLNGKDPETGEPLDDGNIRYQIITFLIAGHE<br/> ATSGLLSFALYFLVKNPHVLQKVAEEAARVLVDPVPSYKQVKQLKYVGMVLNEALRLWPTAPAFSLY<br/> AKEDTVLGGEYPLEKGDEVMVLI PQLHRDKTVWGDDVEEFRPERFENPSAIPQHAFKPFNGQRASI<br/> GQQFALHEATLVLGMLLKHDFDFEDHTNYELDIKETFQLKPKGFVVKAKSKKIPLGGIPSPSTEQSAK<br/> KVRKKAENAHNTPLLVLYGSNMGTAEGTARLDADIAMSKGFAPQVATLDSHAGNLPREGAVLIVTAS<br/> YNGHPPDNAKQFVDWLDQASADEVKGVRYSVFGCGDKNWATTYQKVPAFI DETLAAKGAENIADRGE<br/> ADASDDFEGTYEEWREHMWSDVAAYFNLDIENSEDNKSTLSLQFVDSAADMPLAKMHGAFSTNVVAS<br/> KELQQPGSARSTRHLEIELPKEASYQEGDHLGVI PRNYEGIVNRVTARFGLDASQQIRLEAEEEEKLA<br/> HLPLAKTVSVEELLQYVELQDPVTRTQLRAMAAKTVCPPHKVELEALLEKQAYKEQVLAKRLTMLEL</p>                                                                                                                                                                                                                                                                                        |

LEKYPACEMKFSEFIALLPSIRPRYSISSSPRVDEKQASITVSVVSGEAWSGYGEYKGIASNYLAE  
 LQEGDTITCFISTPQSEFTLPKDPETPLIMVGPGTGVAPFRGFVQARKQLKEQGQSLGEAHL YFGCR  
 SPHEDYLYQEELENAQSEGIITLHTAFSRMPNQPKTYVQHVMEQDGKLIELLDQGAHFYICGDGSQ  
 MAPAVEATLMKSYADVHQVSEADARLWLQQLLEEKGRYAKD VWAGLEHHHHHH \*

### NMR characterization of cyclopropane products

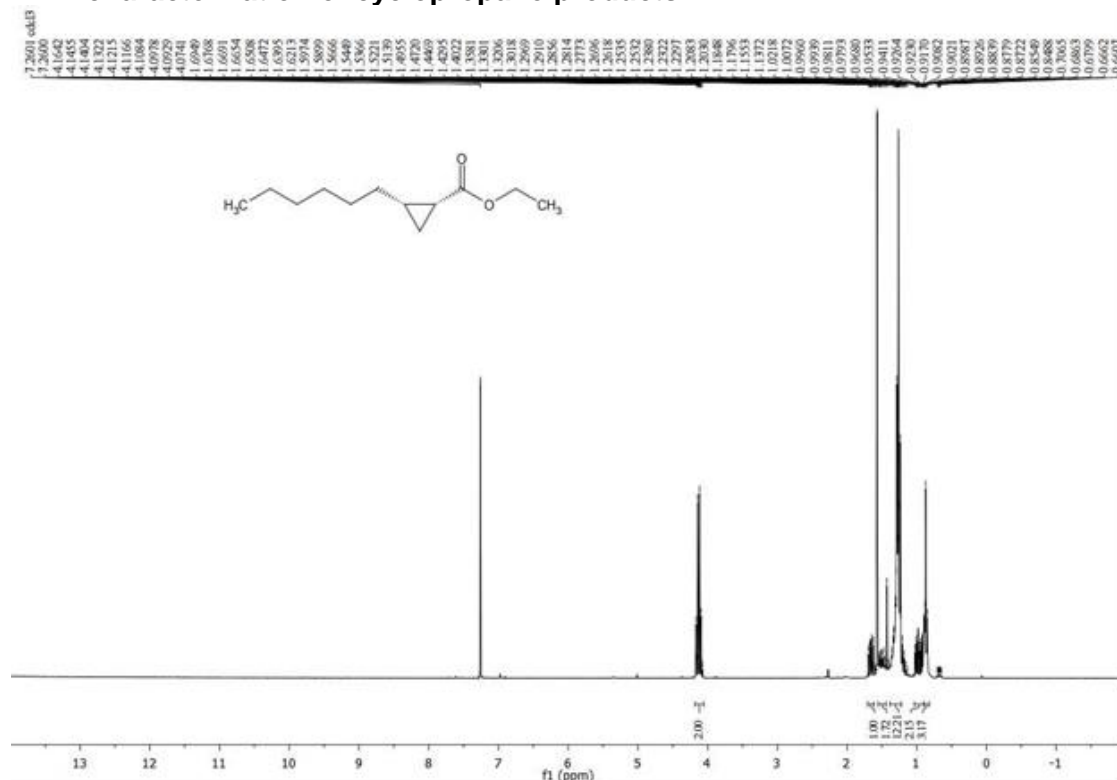

Supplemental Figure 28. <sup>1</sup>H NMR spectrum of *cis*-3a (1-octene + EDA).

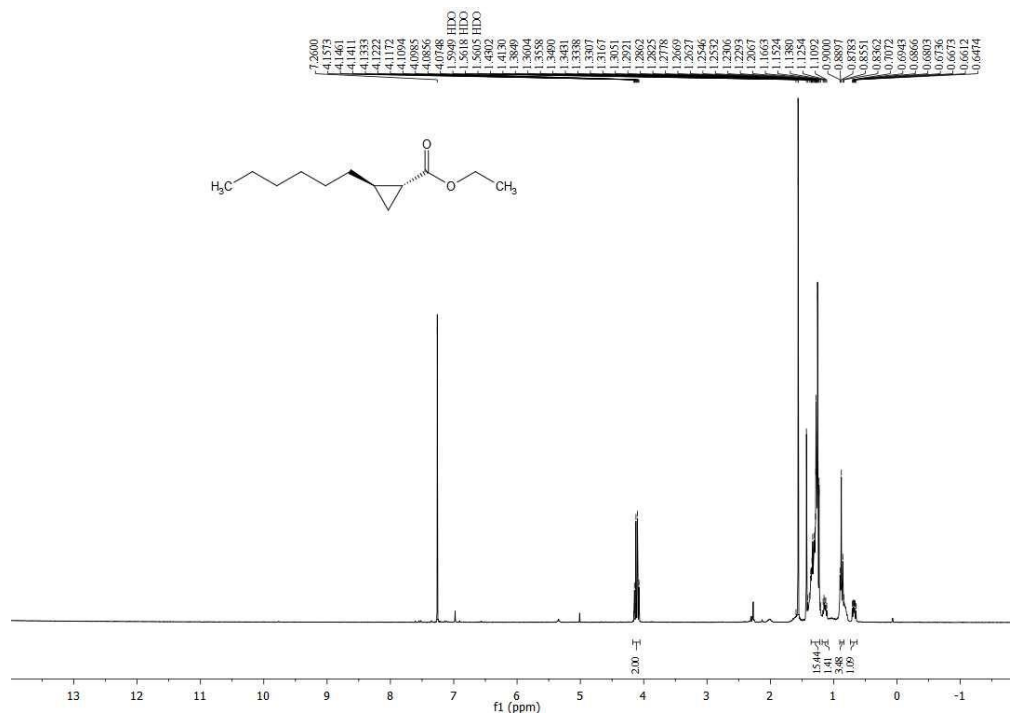

Supplemental Figure 29. <sup>1</sup>H NMR spectrum of *trans*-3a (1-octene + EDA).

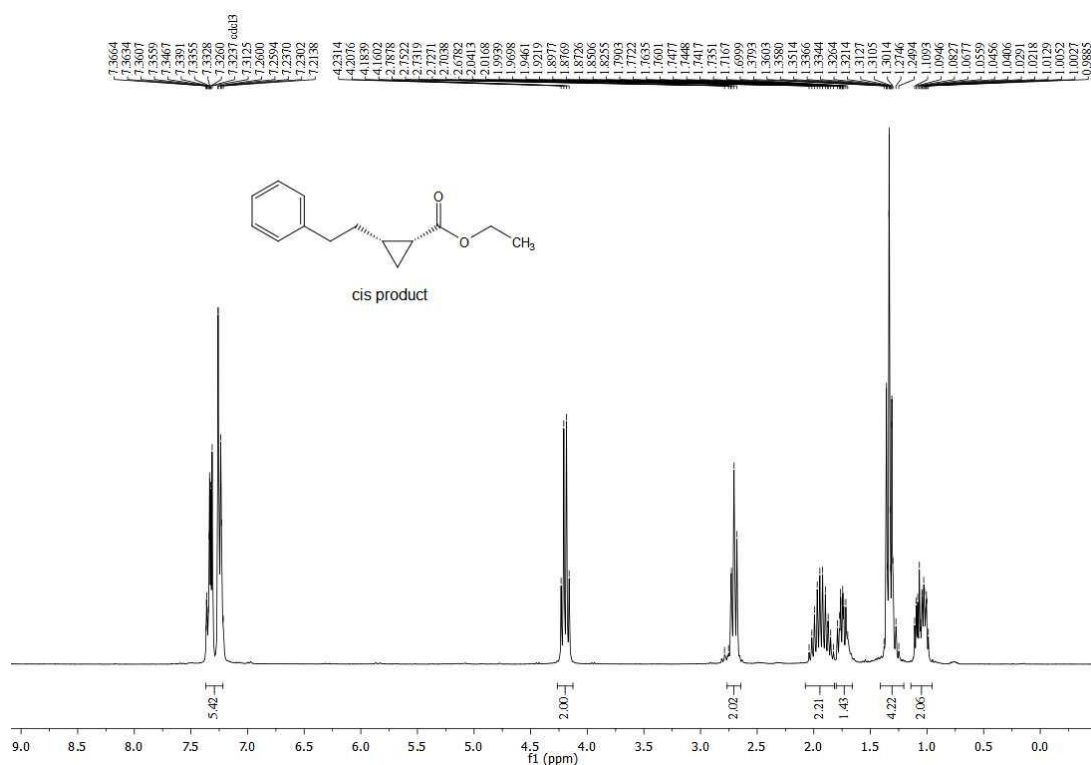

Supplemental Figure 30. <sup>1</sup>H NMR spectrum of *cis*-3b (4-phenyl-1-butene + EDA).

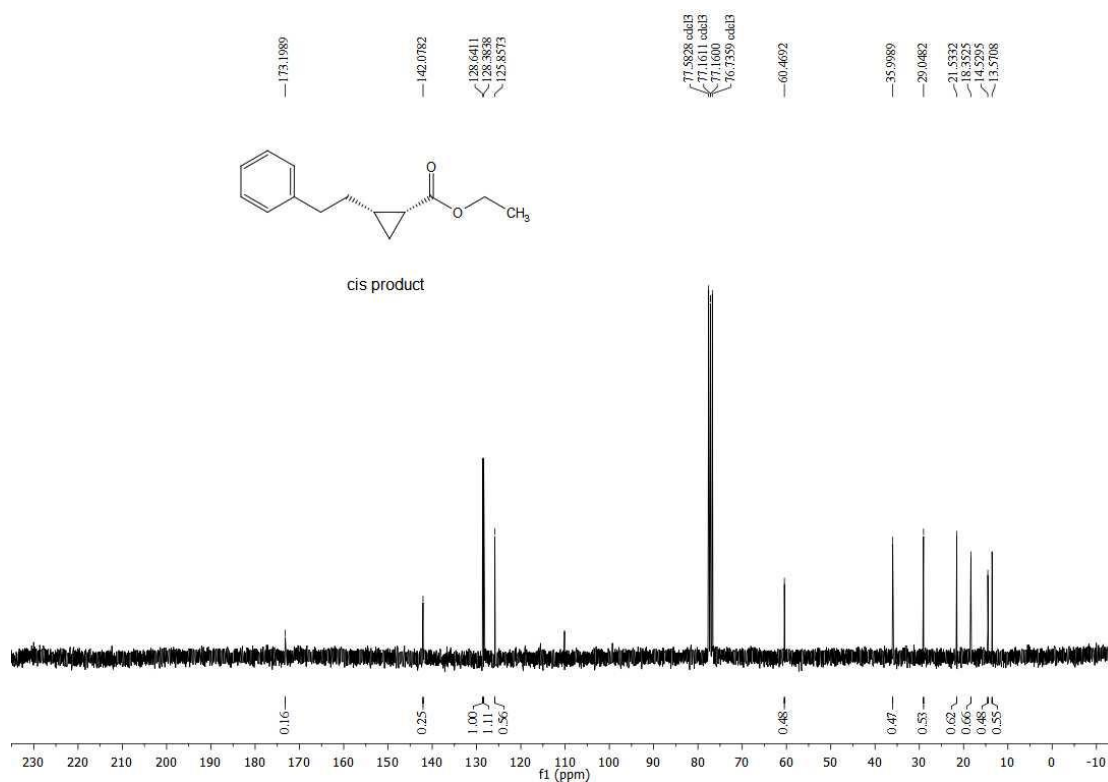

Supplemental Figure 31. <sup>13</sup>C NMR spectrum of *cis*-3b (4-phenyl-1-butene + EDA).

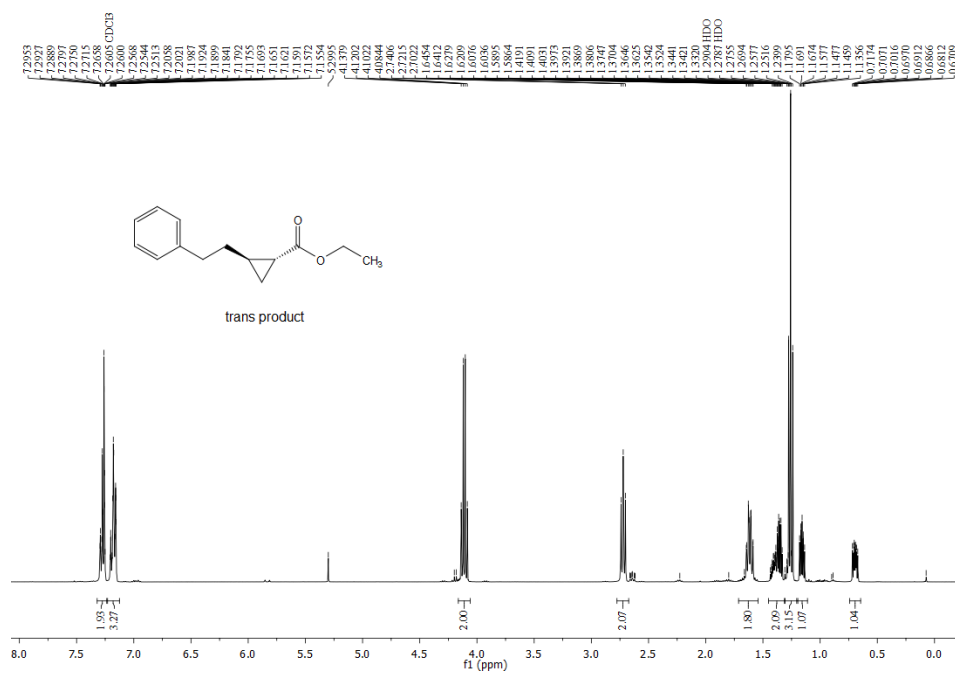

Supplemental Figure 32. <sup>1</sup>H NMR spectrum of *trans*-3b (4-phenyl-1-butene + EDA).

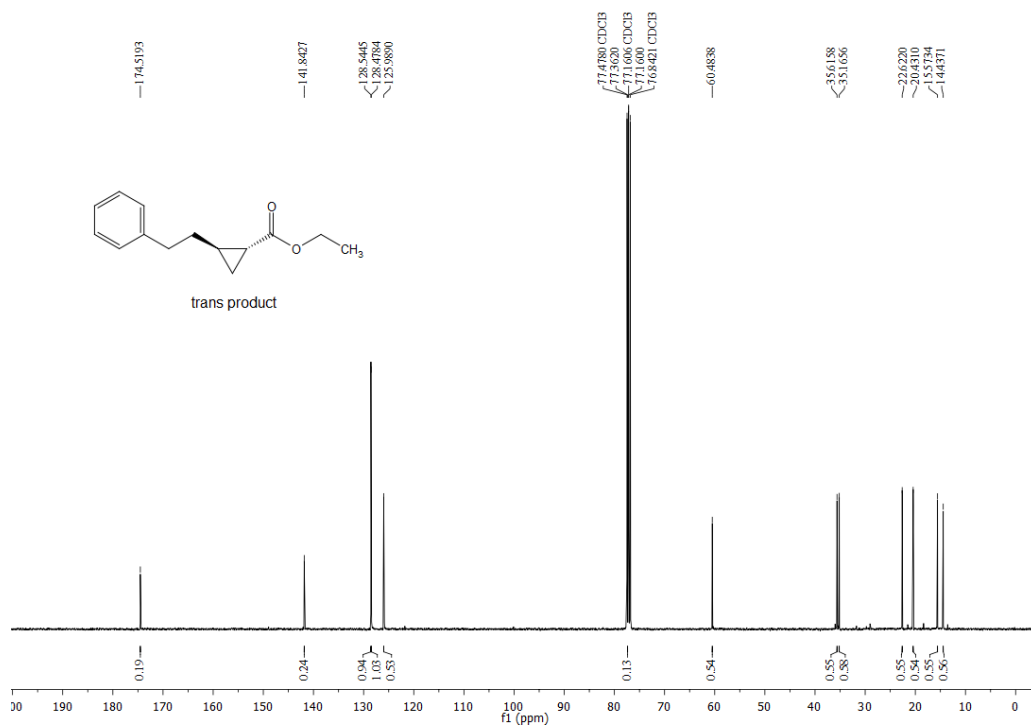

**Supplemental Figure 33.** <sup>13</sup>C NMR spectrum of *trans*-**3b** (4-phenyl-1-butene + EDA).

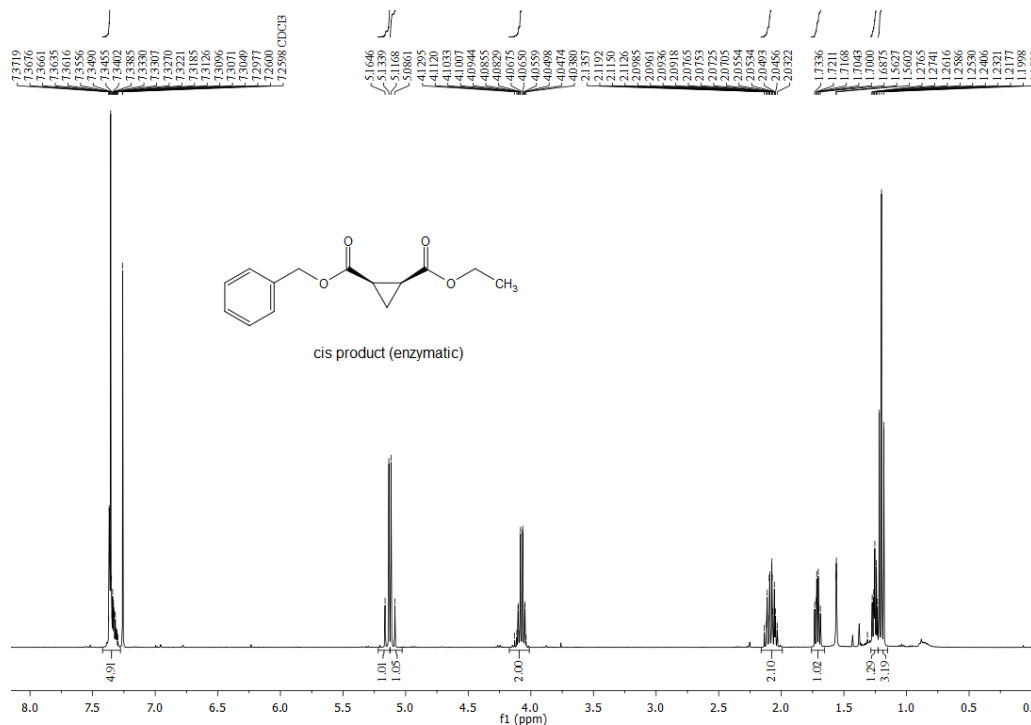

**Supplemental Figure 34.** <sup>1</sup>H NMR spectrum of *cis*-**3c** (benzyl acrylate + EDA, enzymatic from P411-UA V87C).

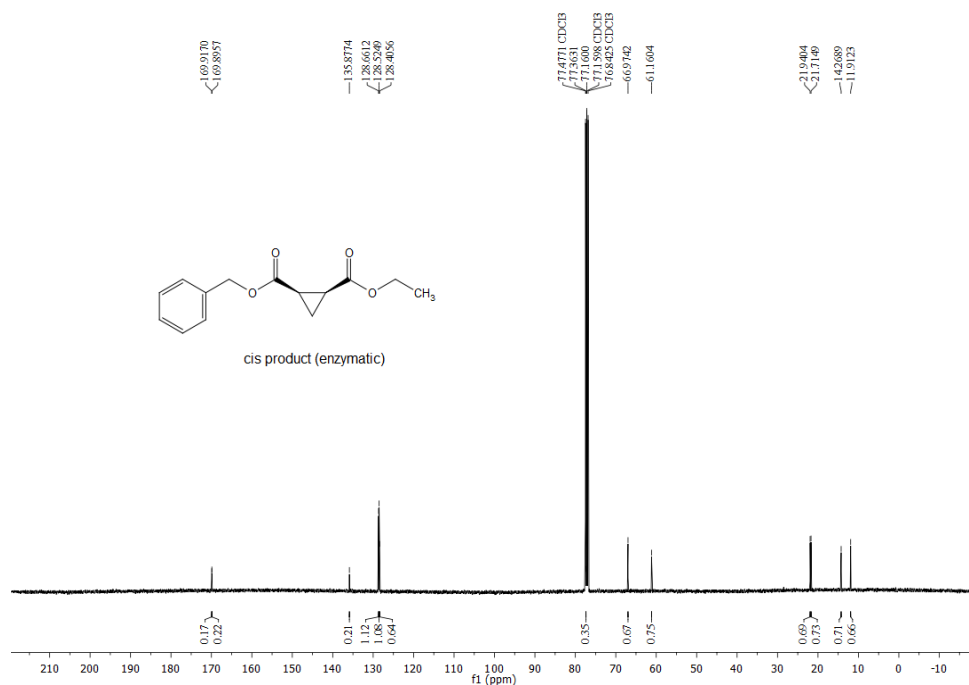

**Supplemental Figure 35.**  $^{13}\text{C}$  NMR spectrum of *cis*-3c (benzyl acrylate + EDA, enzymatic from P411-UA V87C).

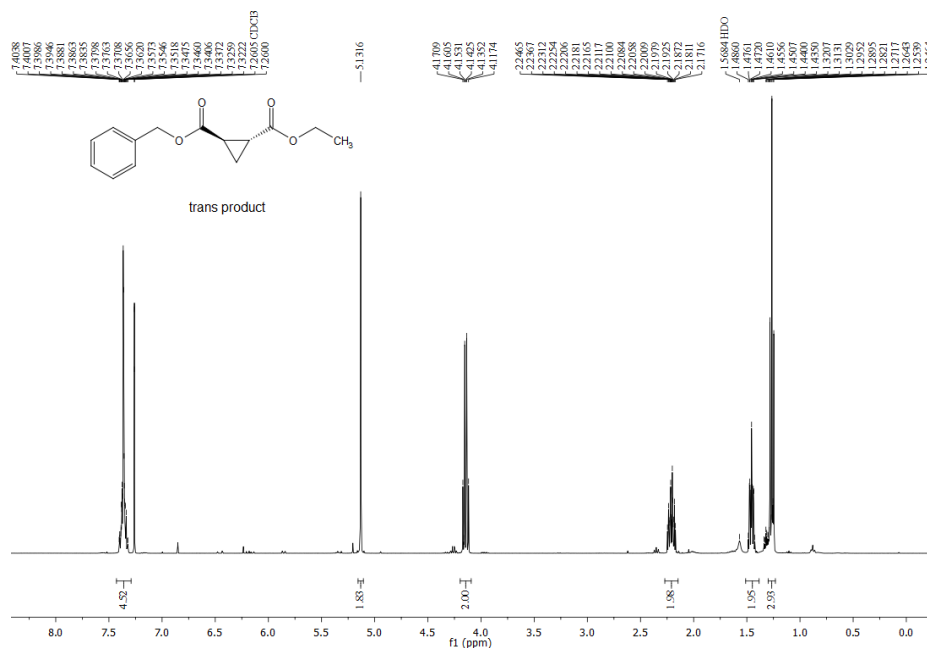

**Supplemental Figure 36.**  $^1\text{H}$  NMR spectrum of *trans*-3c (benzyl acrylate + EDA, enzymatic from P411-UA V87F).

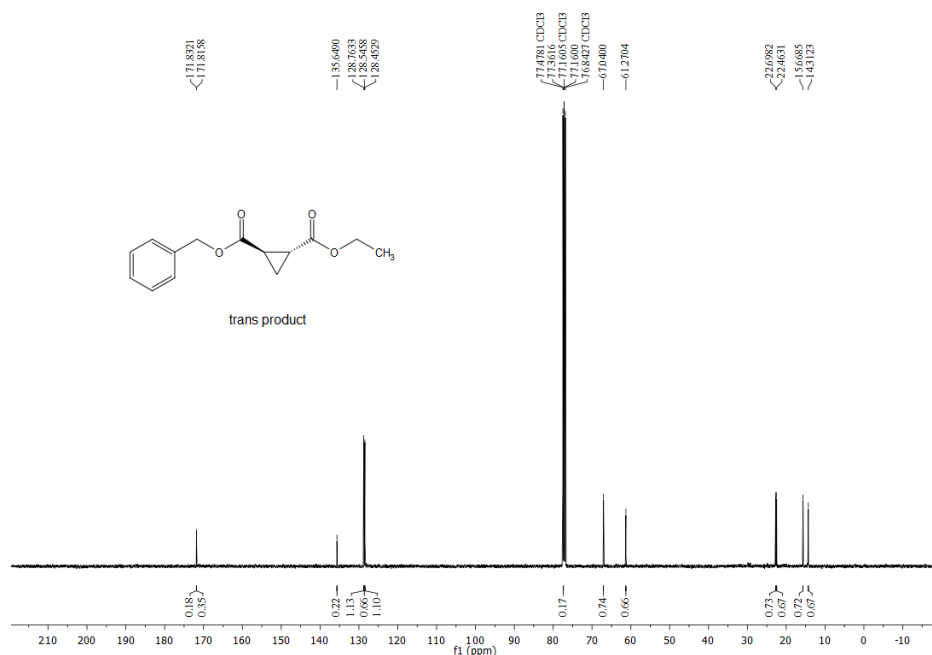

**Supplemental Figure 37.**  $^{13}\text{C}$  NMR spectrum of *trans*-**3c** (benzyl acrylate + EDA, enzymatic from P411-UA V87F).

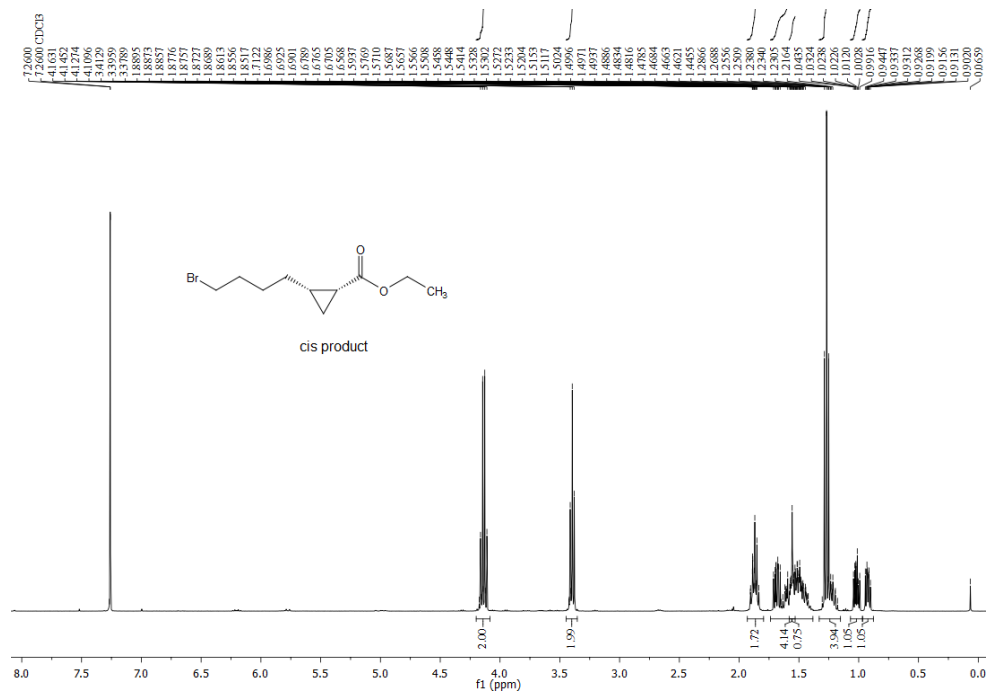

**Supplemental Figure 38.**  $^1\text{H}$  NMR spectrum of *cis*-**3d** (6-bromo-1-hexene + EDA).



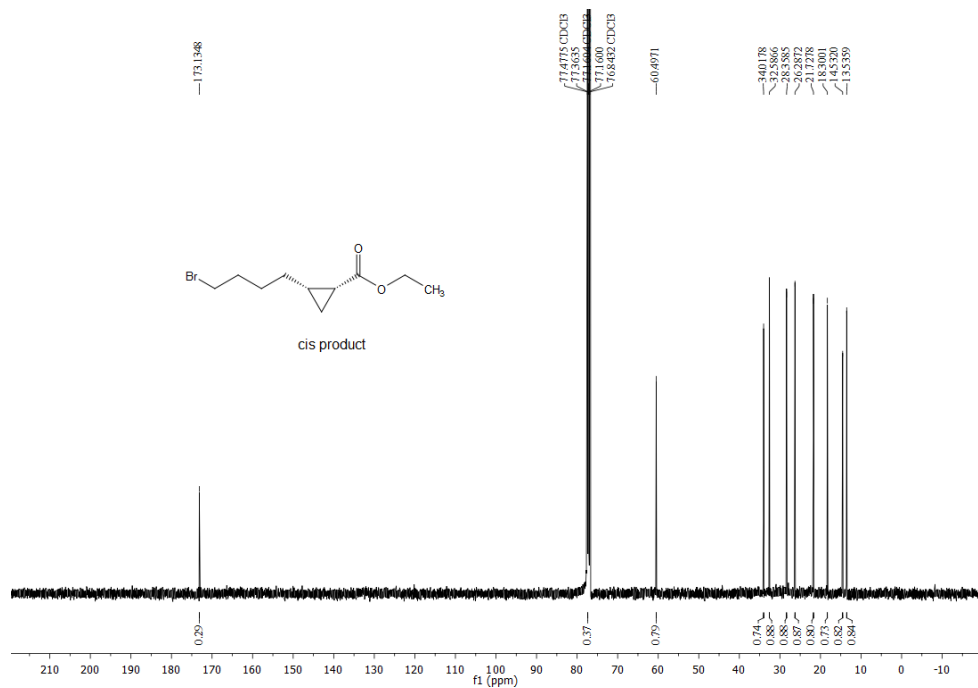

Supplemental Figure 39. <sup>13</sup>C NMR spectrum of *cis*-3d (6-bromo-1-hexene + EDA).

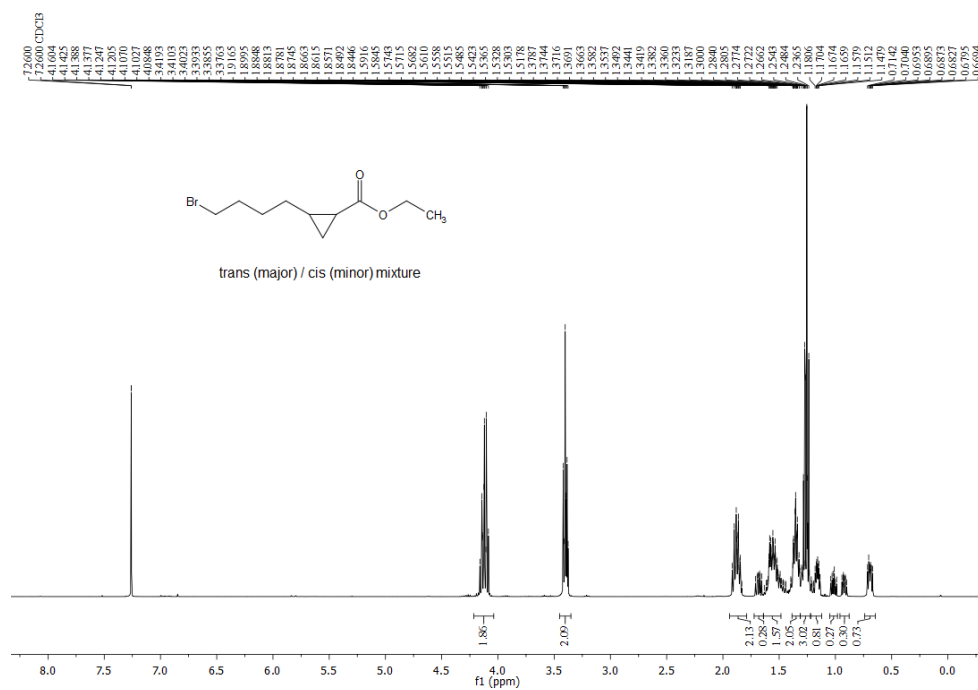

Supplemental Figure 40. <sup>1</sup>H NMR spectrum of 3d (6-bromo-1-hexene + EDA) diastereomeric mixture (~71:29 *trans*:*cis*).

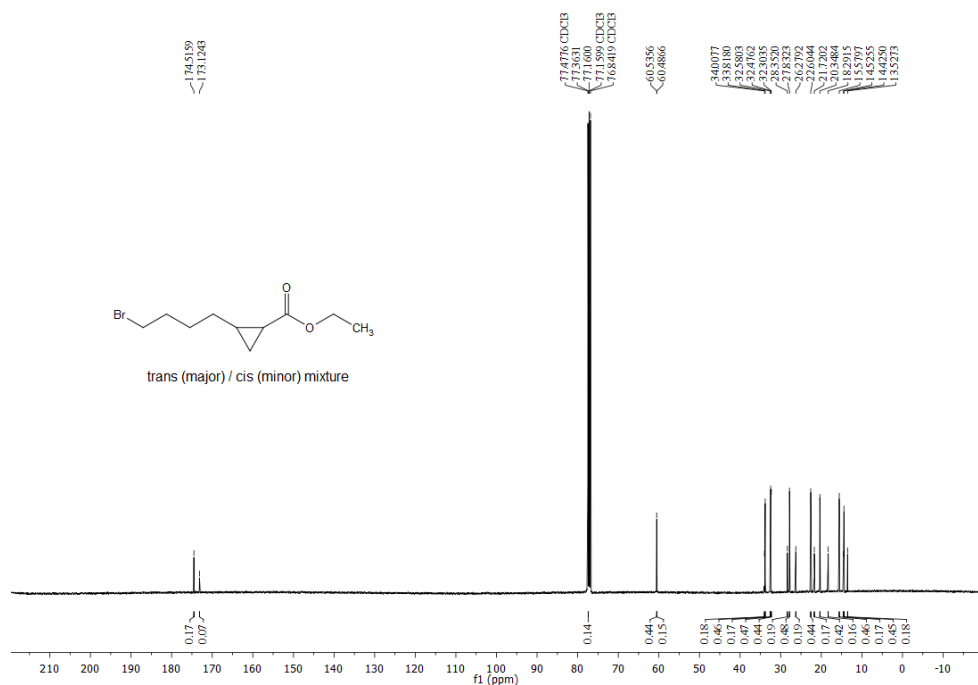

**Supplemental Figure 41.** <sup>13</sup>C NMR spectrum of **3d** (6-bromo-1-hexene + EDA) diastereomeric mixture (~71:29 *trans*:*cis*).

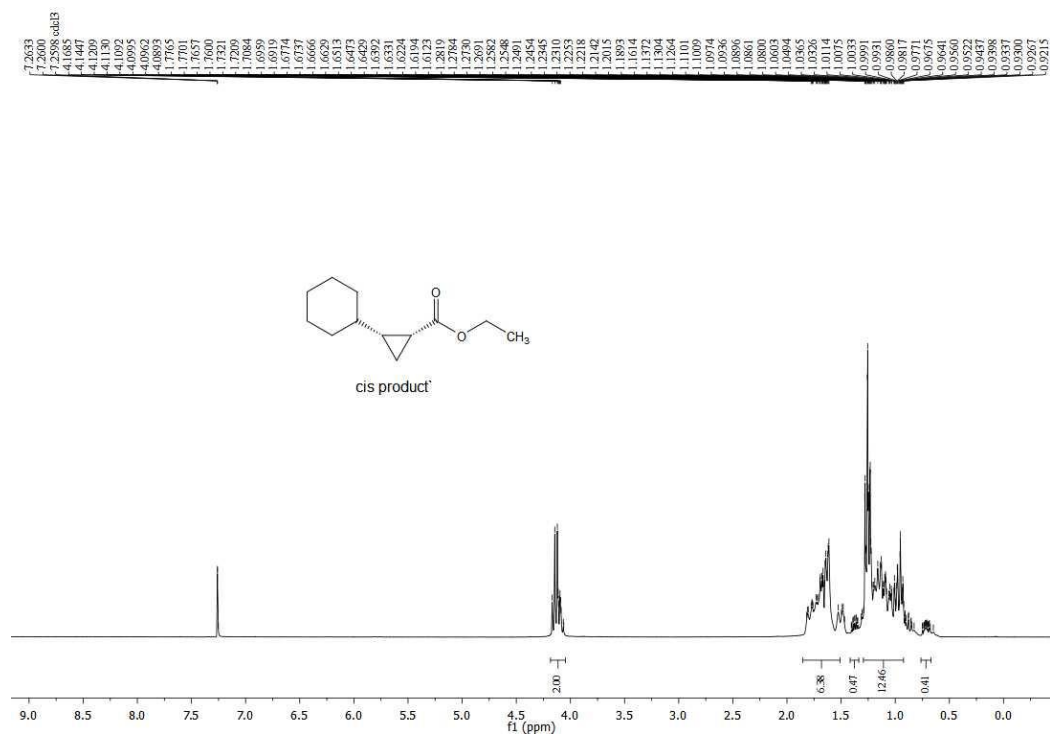

**Supplemental Figure 42.** <sup>1</sup>H NMR spectrum of *cis*-**3e** (vinylcyclohexane + EDA).

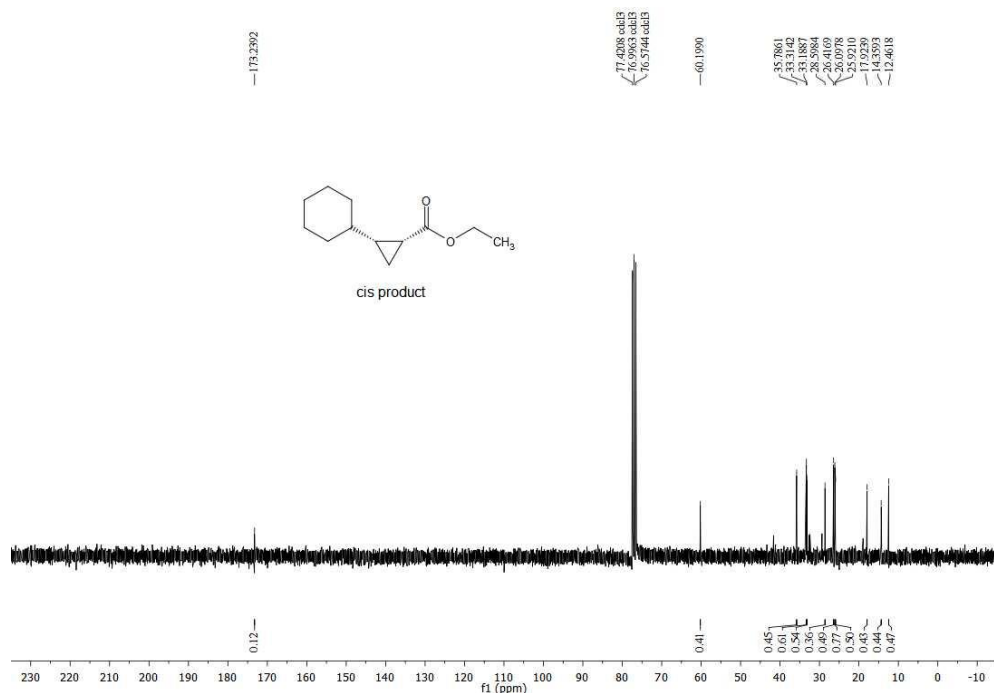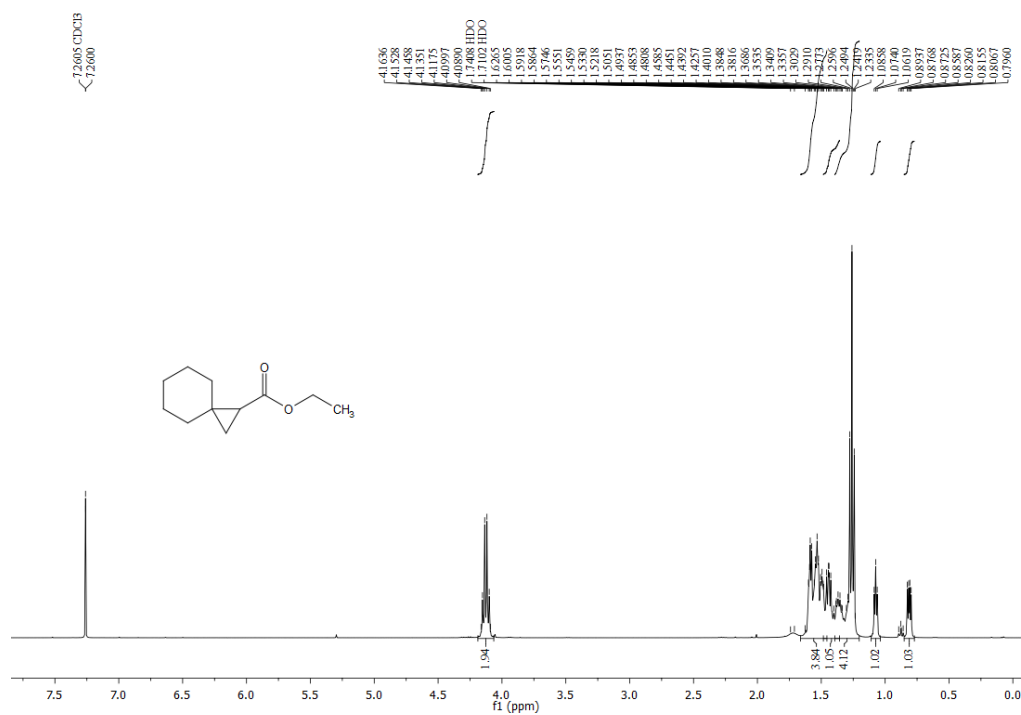

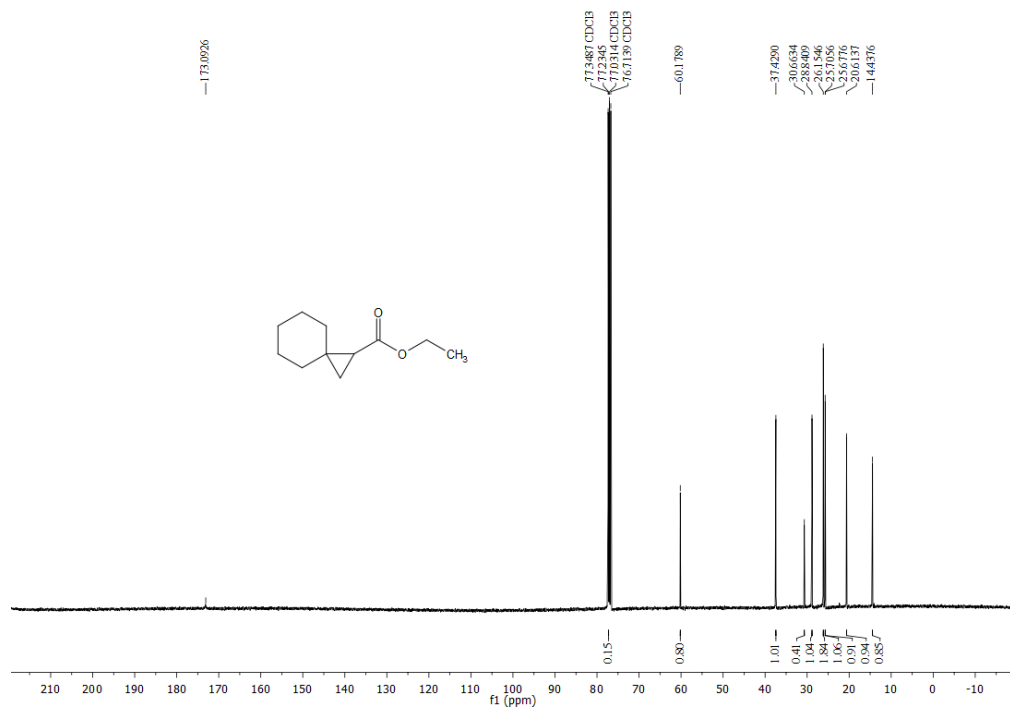

**Supplemental Figure 45.**  $^{13}\text{C}$  NMR spectrum of **3f** (methylene cyclohexane + EDA, enzymatic from ApePgb AGW).

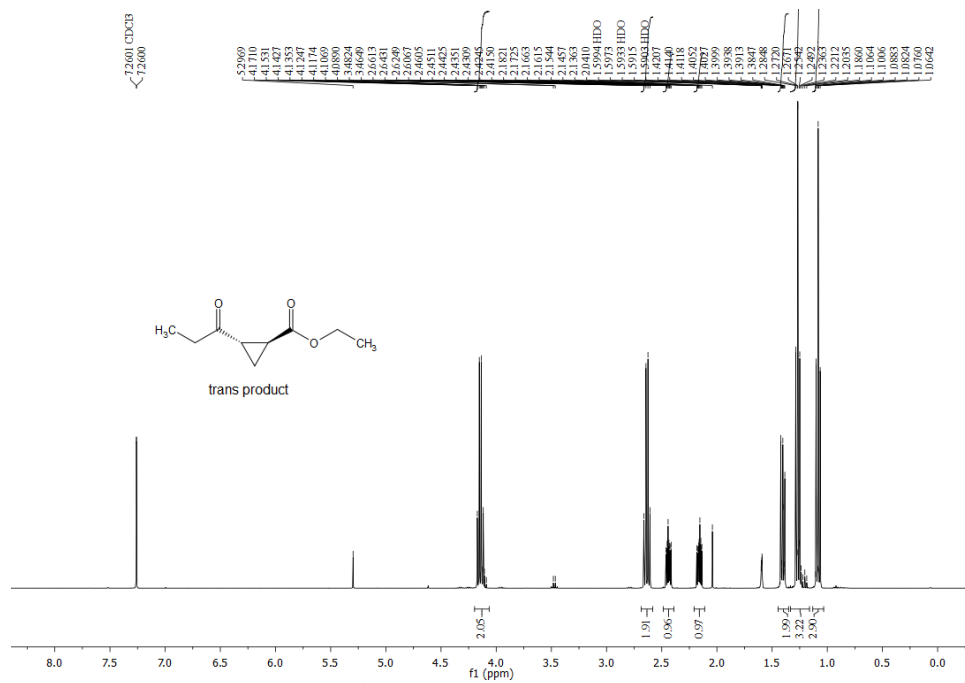

**Supplemental Figure 46.**  $^1\text{H}$  NMR spectrum of *trans*-**3g** (1-penten-3-one + EDA).

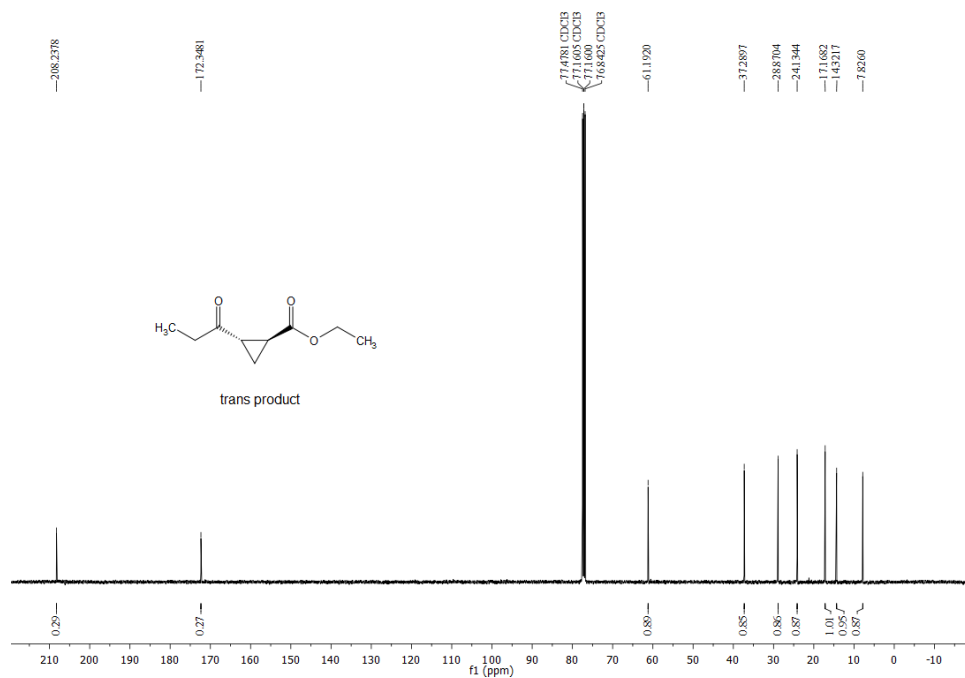

Supplemental Figure 47.  $^{13}\text{C}$  NMR spectrum of *trans*-3g (1-penten-3-one + EDA).

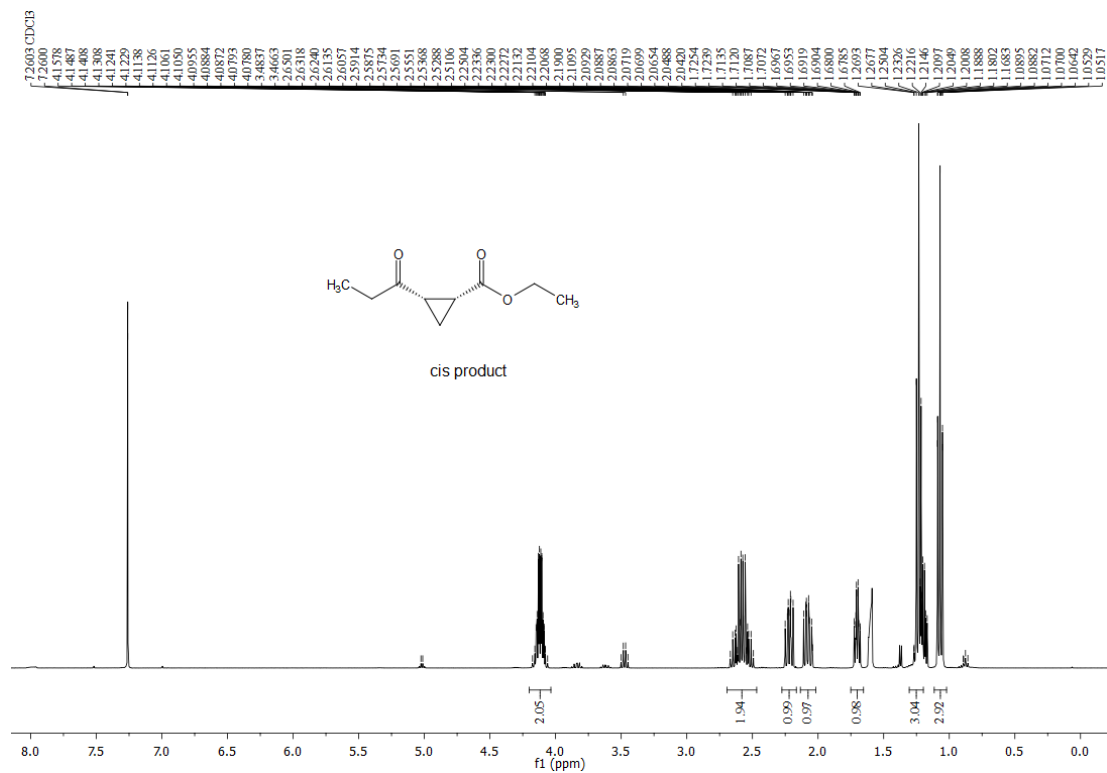

Supplemental Figure 48.  $^1\text{H}$  NMR spectrum of *cis*-3g (1-penten-3-one + EDA).

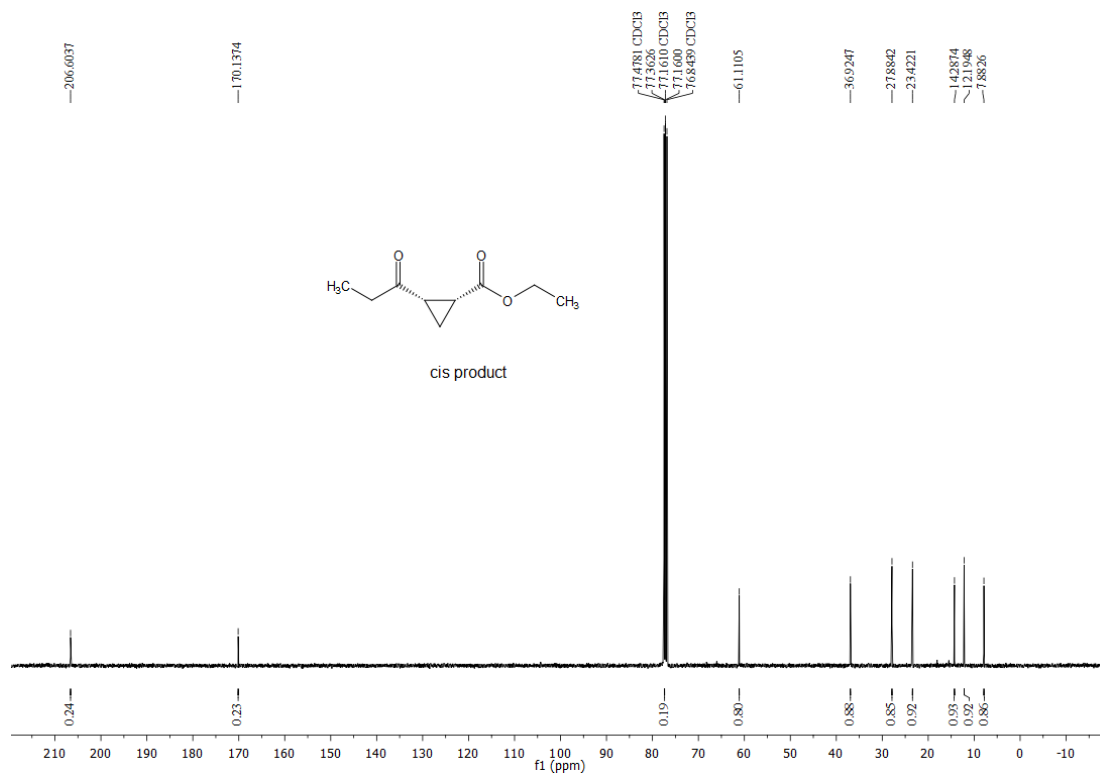

Supplemental Figure 49. <sup>13</sup>C NMR spectrum of *cis*-3g (1-penten-3-one + EDA).

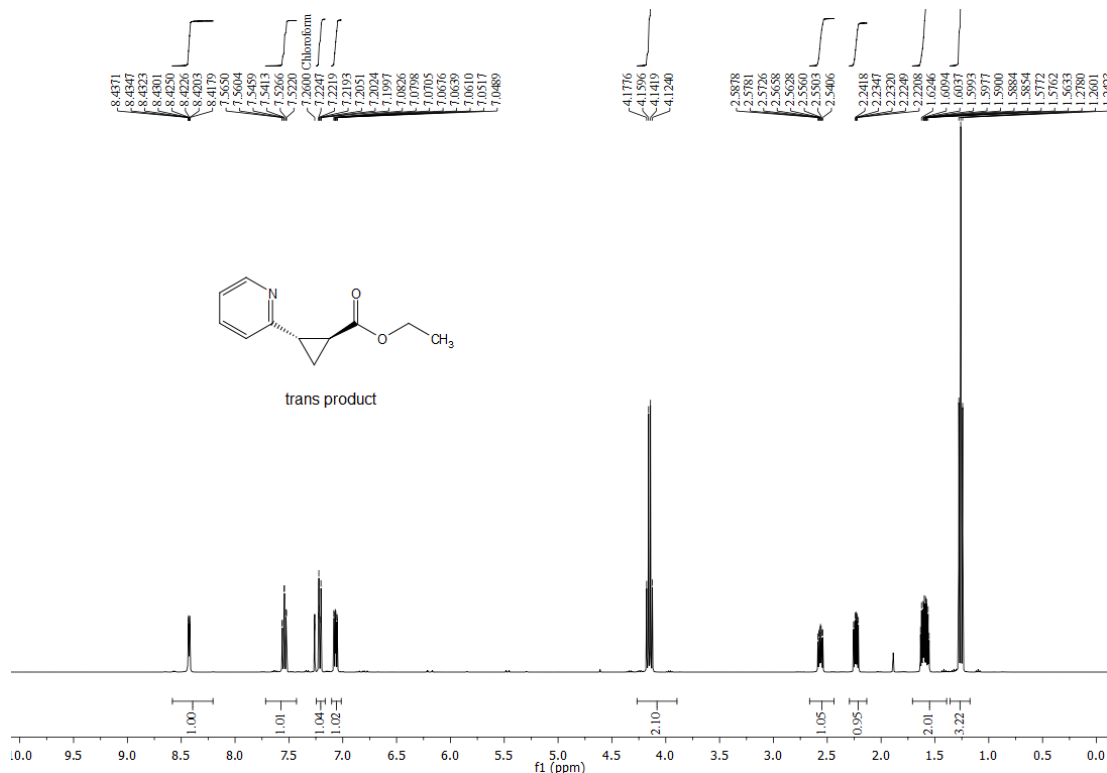

Supplemental Figure 50. <sup>1</sup>H NMR spectrum of *trans*-3h (2-vinylpyridine + EDA).

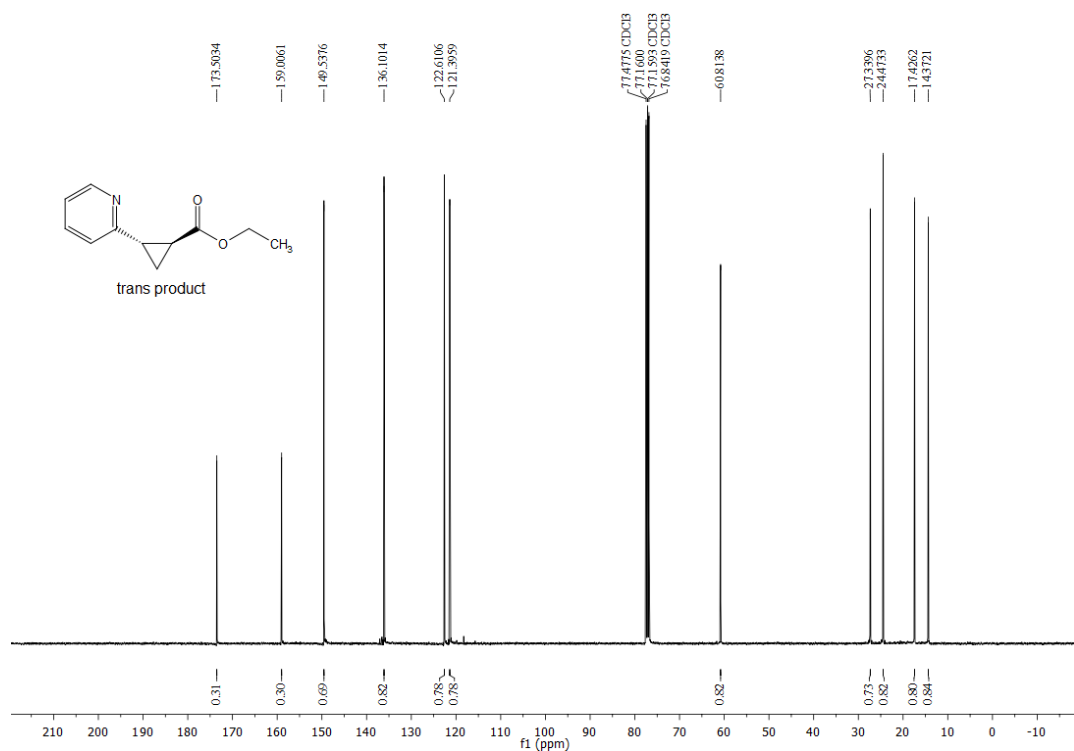

Supplemental Figure 51.  $^{13}\text{C}$  NMR spectrum of *trans*-3h (2-vinylpyridine + EDA).

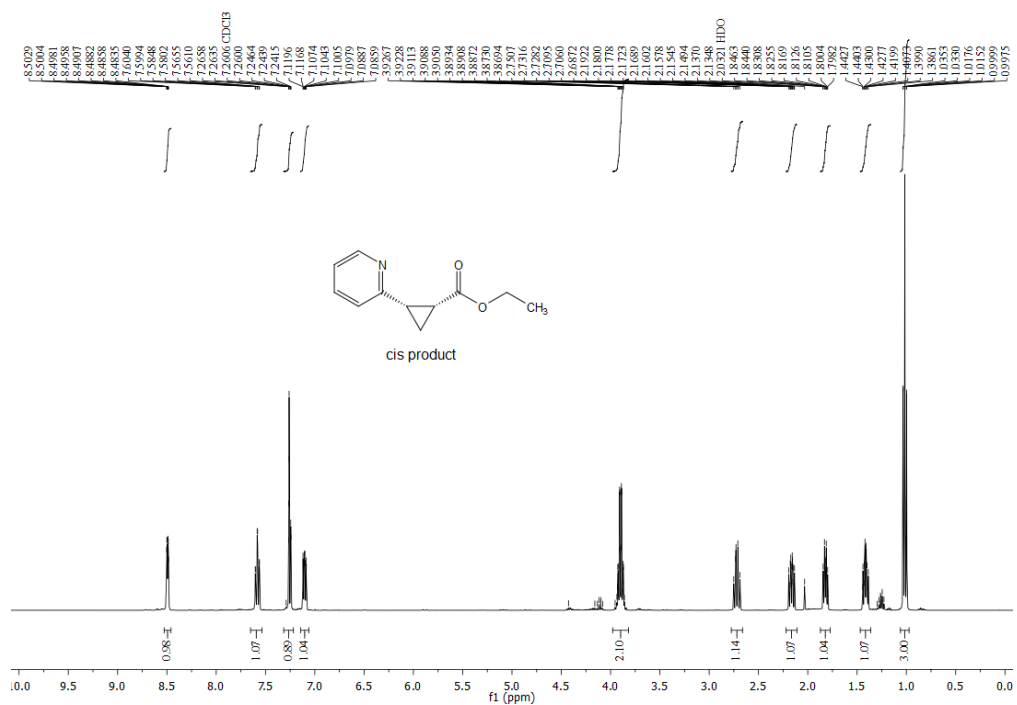

Supplemental Figure 52.  $^1\text{H}$  NMR spectrum of *cis*-3h (2-vinylpyridine + EDA).





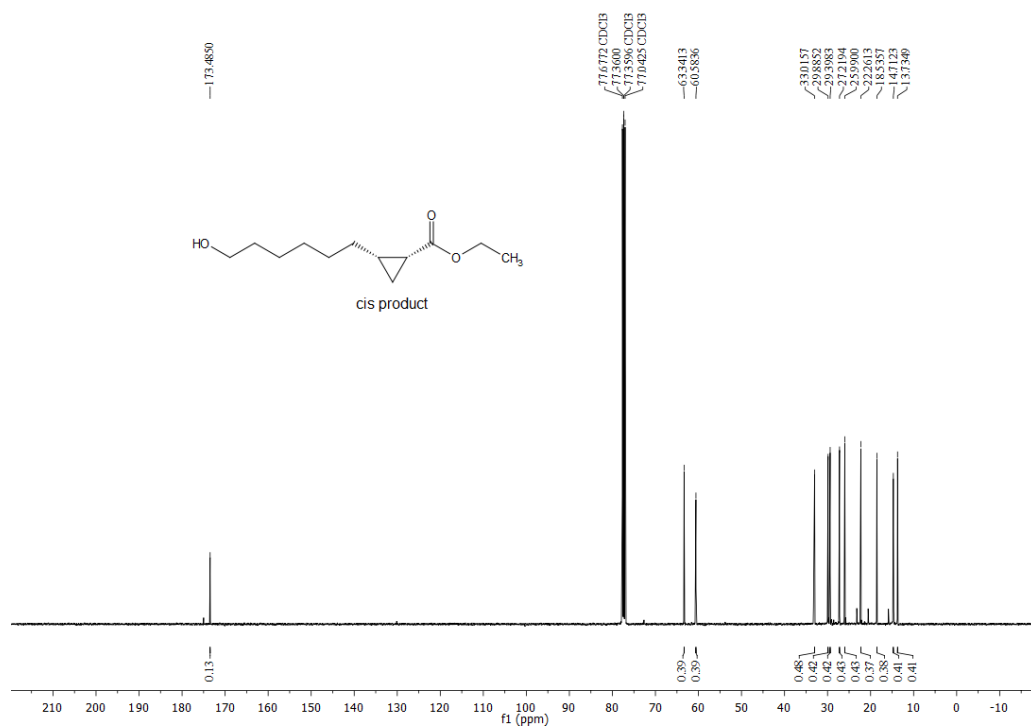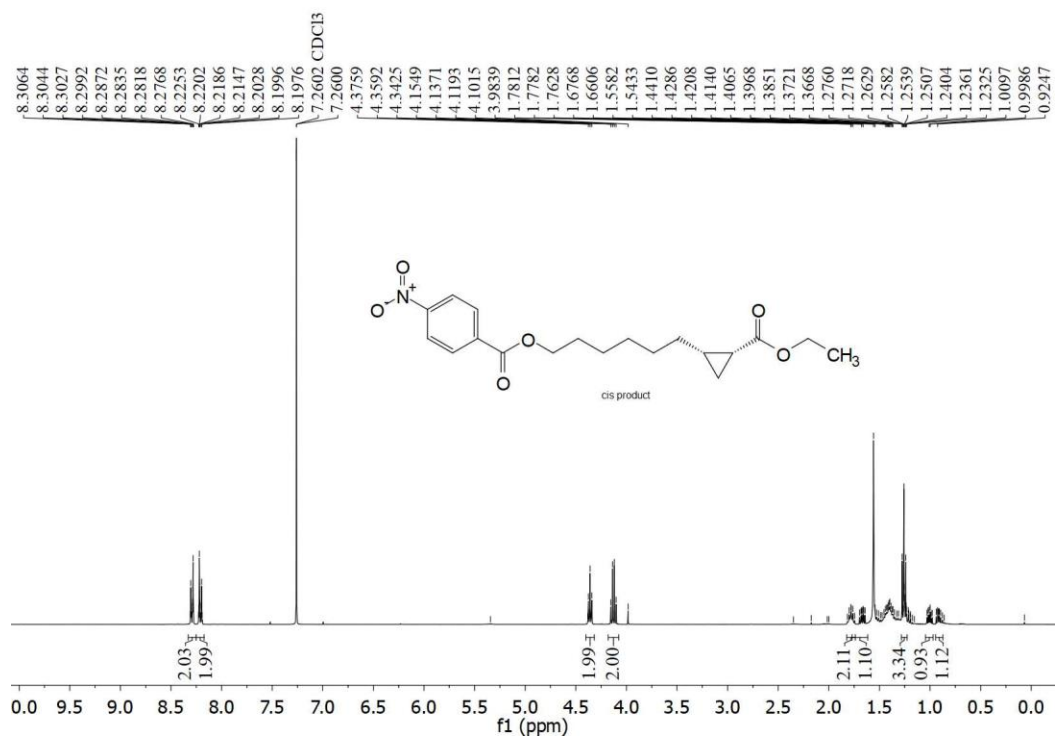

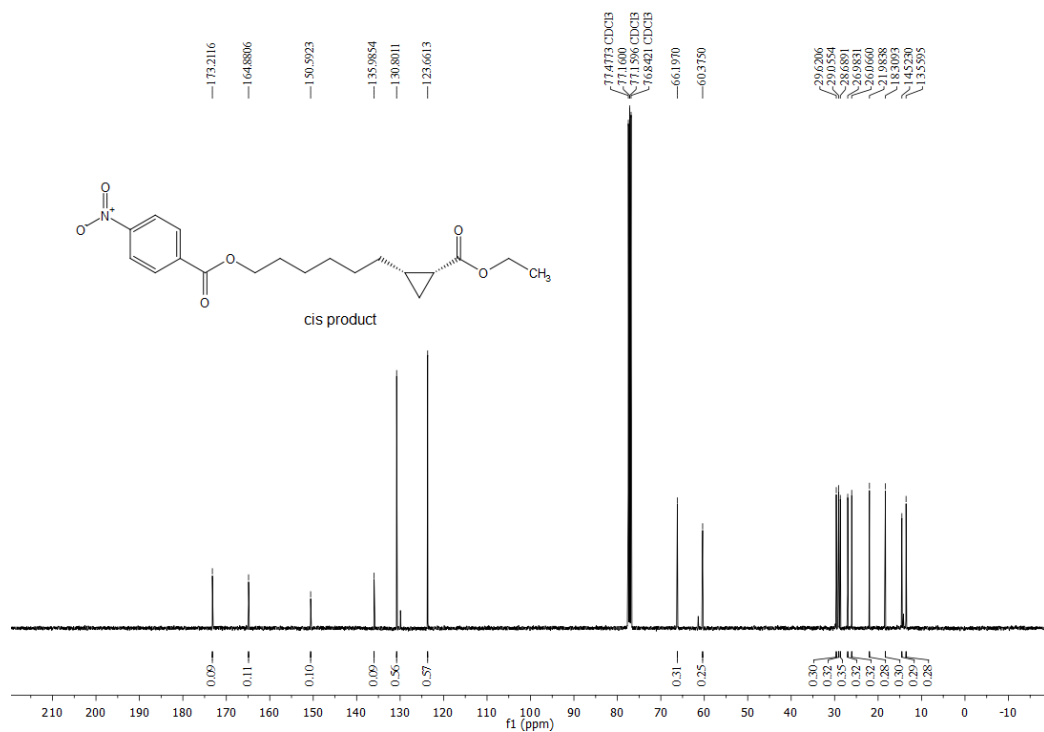

**Supplemental Figure 57.** <sup>13</sup>C NMR spectrum of *cis*-**3ia** (*para*-NO<sub>2</sub>-benzoyl protected **3i**).

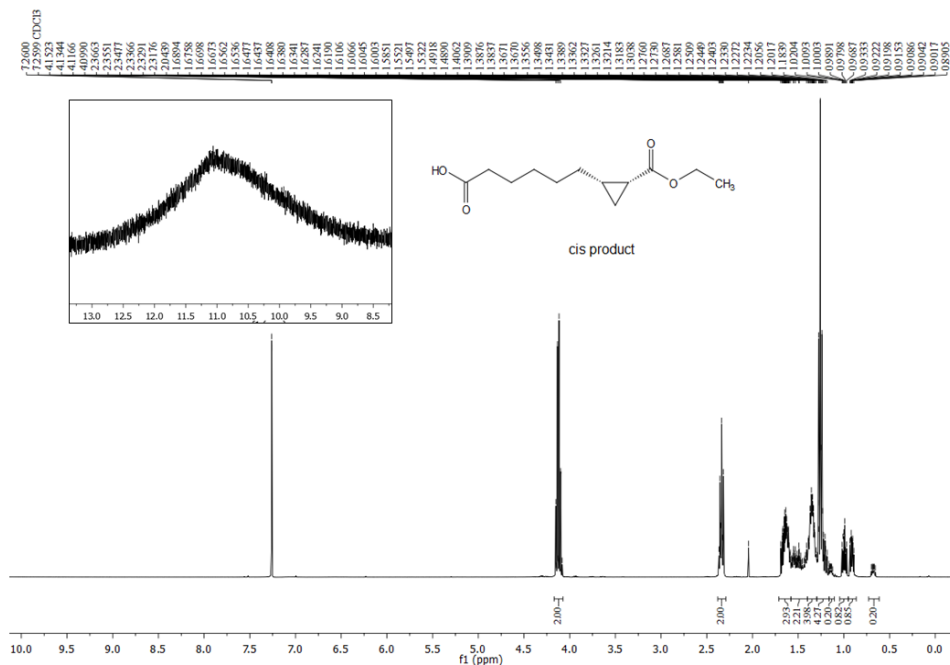

**Supplemental Figure 58.** <sup>1</sup>H NMR spectrum of **3j** (7-octen-1-ic acid + EDA, enzymatic from ApePgb AGW). The carboxylic acid proton at 11.0 ppm is broad and not visible unless the spectrum is magnified.



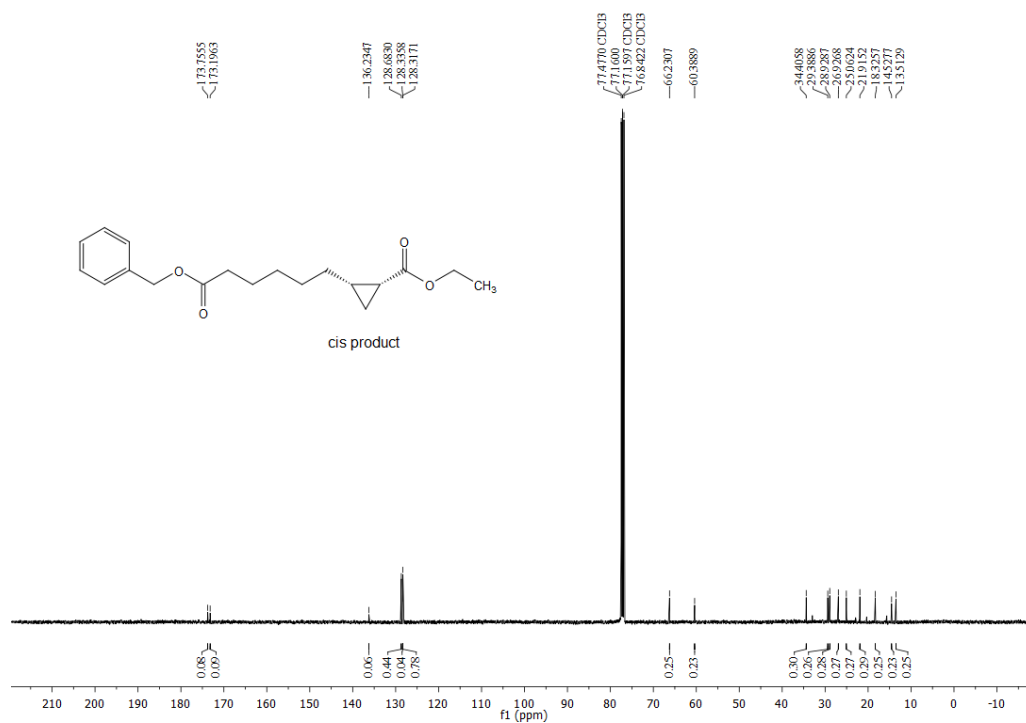

Supplemental Figure 61. <sup>13</sup>C NMR spectrum of *cis*-3ja (benzyl protected 3j).

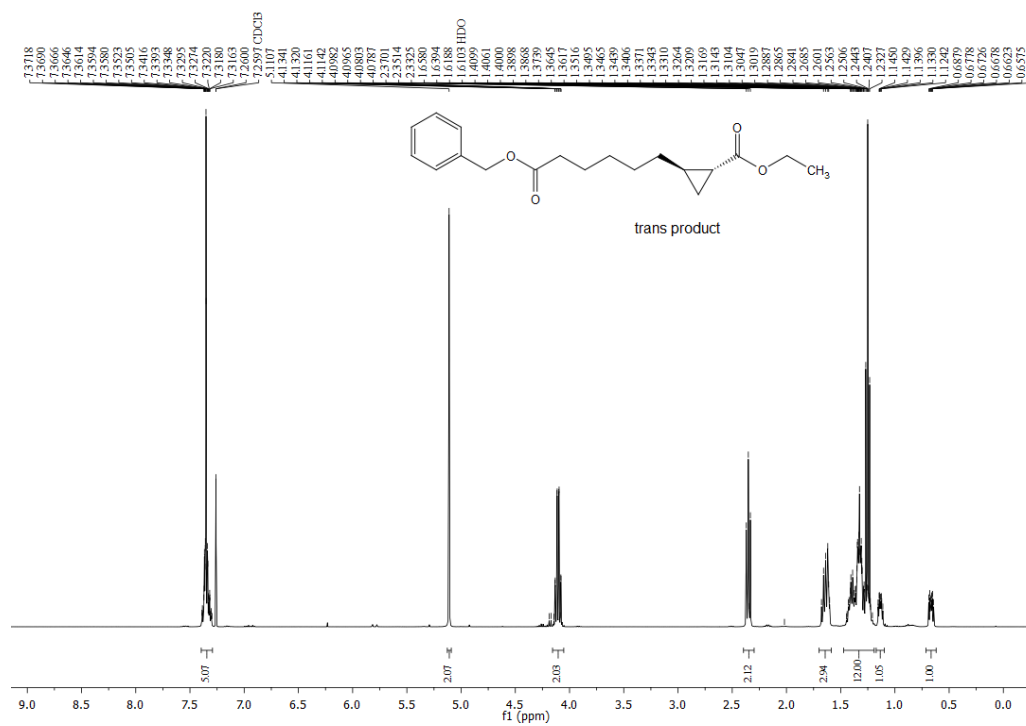

Supplemental Figure 62. <sup>1</sup>H NMR spectrum of *trans*-3ja (benzyl-protected 3j).

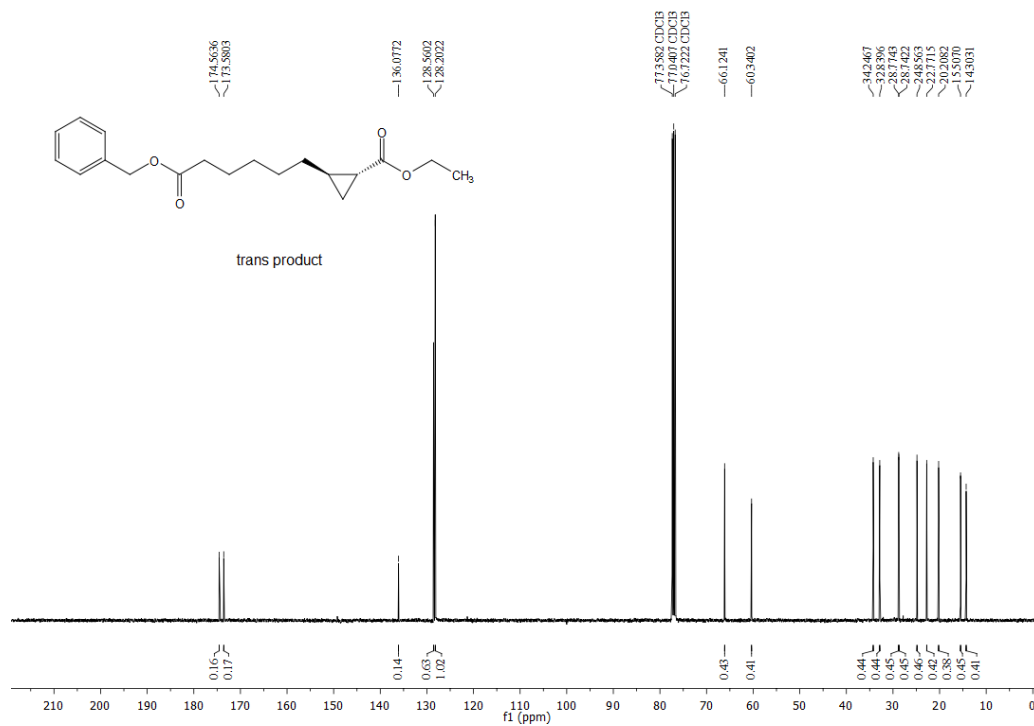

Supplemental Figure 63. <sup>13</sup>C NMR spectrum of *trans*-3ja (benzyl protected 3j).

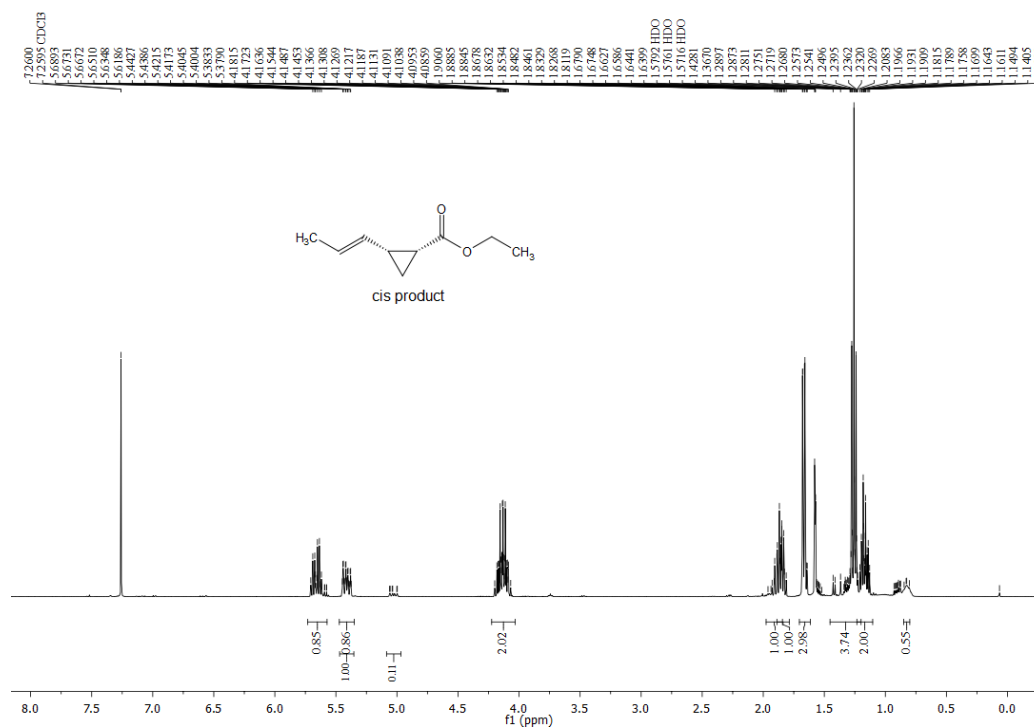

Supplemental Figure 64. <sup>1</sup>H NMR spectrum of *cis*-3k ((*E*)-penta-1,3-diene + EDA, enzymatic from ApePgb AGW).



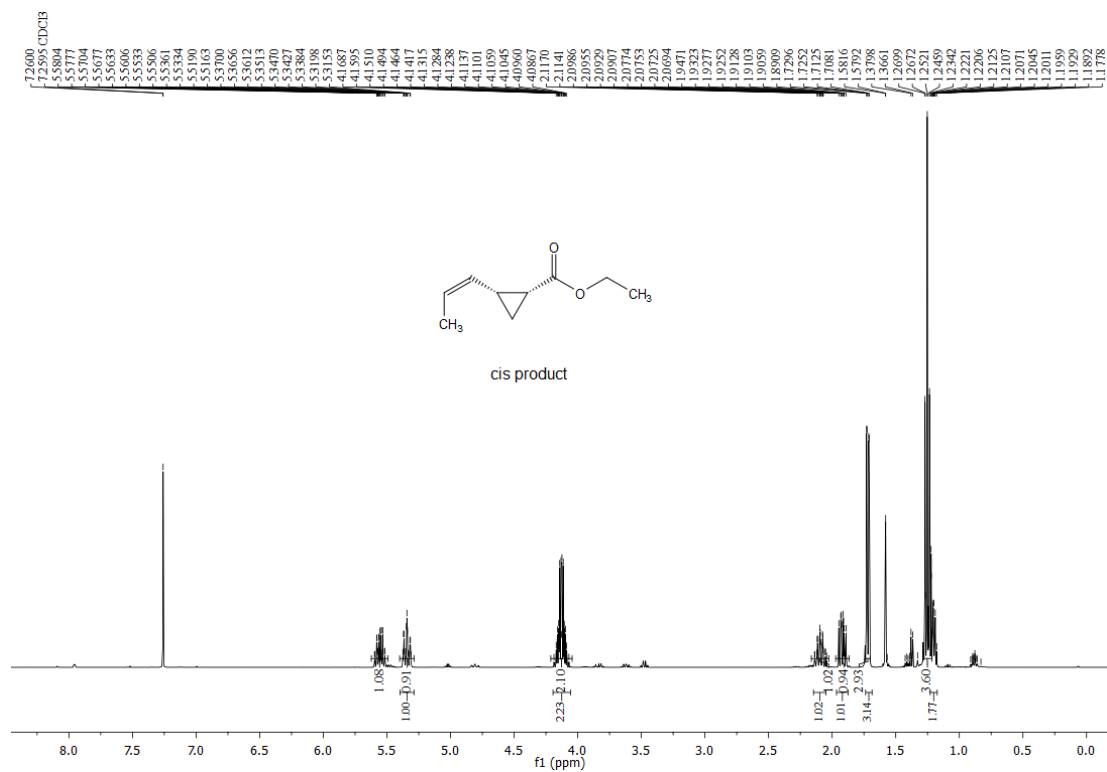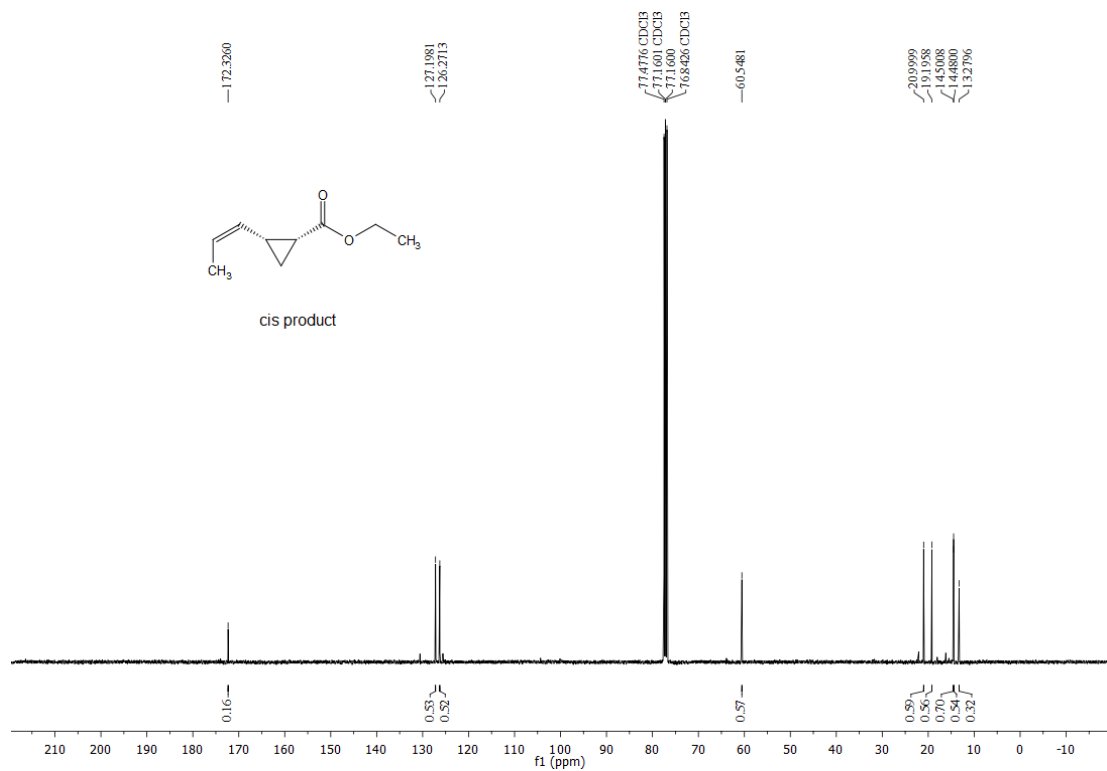





## References

- (1) Wolf, J. R.; Hamaker, C. G.; Djukic, J.; Kodadek, T.; Woo, L. K. Shape and stereoselective cyclopropanation of alkenes catalyzed by iron porphyrins. *J. Am. Chem. Soc.* **1995**, *117*, 9194–9199.
- (2) Morandi, B.; Carreira, E. M. Iron-catalyzed cyclopropanation with trifluoroethylamine hydrochloride and olefins in aqueous media: in situ generation of trifluoromethyl diazomethane. *Angew. Chem. Int. Ed.* **2010**, *49*, 938–941.
- (3) Duan, Y.; Lin, J.-H.; Xiao, J.-C.; Gu, Y.-C. A trifluoromethylcarbene source. *Org. Lett.* **2016**, *18*, 2471–2474.
- (4) Duan, Y.; Lin, J.-H.; Xiao, J.-C.; Gu, Y.-C. Difluoromethylcarbene for iron-catalyzed cyclopropanation. *Chem. Commun.* **2017**, *53*, 3870–3873.
- (5) Davies, H. M. L.; Bruzinski, P. R.; Lake, D. H.; Kong, N.; Fall, M. J. Asymmetric cyclopropanations by rhodium(II) *n*-(arylsulfonyl)prolinate catalyzed decomposition of vinyldiazomethanes in the presence of alkenes. Practical enantioselective synthesis of the four stereoisomers of 2-phenylcyclopropan-1-amino acid. *J. Am. Chem. Soc.* **1996**, *118*, 6897–6907.
- (6) Marcoux, D.; Azzi, S.; Charette, A. B. TfNH<sub>2</sub> as achiral hydrogen-bond donor additive to enhance the selectivity of a transition metal catalyzed reaction. Highly enantio- and diastereoselective rhodium-catalyzed cyclopropanation of alkenes using  $\alpha$ -cyano diazoacetamide. *J. Am. Chem. Soc.* **2009**, *131*, 6970–6972.
- (7) Chuprakov, S.; Kwok, S. W.; Zhang, L.; Lercher, L.; Fokin, V. V. Rhodium-catalyzed enantioselective cyclopropanation of olefins with *N*-sulfonyl 1,2,3-triazoles. *J. Am. Chem. Soc.* **2009**, *131*, 18034–18035.
- (8) Grimster, N.; Zhang, L.; Fokin, V. V. Synthesis and reactivity of rhodium(II) *N*-triflyl azavinyl carbenes. *J. Am. Chem. Soc.* **2010**, *132*, 2510–2511.
- (9) Lindsay, V. N. G.; Nicolas, C.; Charette, A. B. Asymmetric Rh(II)-catalyzed cyclopropanation of alkenes with diacceptor diazo compounds: *p*-methoxyphenyl ketone as a general stereoselectivity controlling group. *J. Am. Chem. Soc.* **2011**, *133*, 8972–8981.
- (10) Qin, C.; Boyarskikh, V.; Hansen, J. H.; Hardcastle, K. I.; Musaev, D. G.; Davies, H. M. L. *D*<sub>2</sub>-symmetric dirhodium catalyst derived from a 1,2,2-triarylcyclopropanecarboxylate ligand: design, synthesis and application. *J. Am. Chem. Soc.* **2011**, *133*, 19198–19204.
- (11) Lindsay, V. N. G.; Fiset, D.; Gritsch, P. J.; Azzi, S.; Charette, A. B. Stereoselective Rh<sub>2</sub>(*S*-IBAZ)<sub>4</sub>-catalyzed cyclopropanation of alkenes, alkynes, and allenes: asymmetric synthesis of diacceptor cyclopropylphosphonates and alkylidenecyclopropanes. *J. Am. Chem. Soc.* **2013**, *135*, 1463–1470.
- (12) Chi, Y.; Qiu, L.; Xu, X. highly enantioselective synthesis of spirocyclopropyloxindoles via a Rh(II)-catalyzed asymmetric cyclopropanation reaction. *Org. Biomol. Chem.* **2016**, *14*, 10357–10361.
- (13) Pons, A.; Ivashkin, P.; Poisson, T.; Charette, A. B.; Pannecoucke, X.; Jubault, P. Catalytic enantioselective synthesis of halocyclopropanes. *Chem. Eur. J.* **2016**, *22*, 6239–6242.
- (14) Suematsu, H.; Kanchiku, S.; Uchida, T.; Katsuki, T. Construction of aryliridium–salen complexes: enantio- and *cis*-selective cyclopropanation of conjugated and nonconjugated olefins. *J. Am. Chem. Soc.* **2008**, *130*, 10327–10337.
- (15) Key, H. M.; Dydio, P.; Clark, D. S.; Hartwig, J. F. Abiological catalysis by artificial haem proteins containing noble metals in place of iron. *Nature* **2016**, *534*, 534–537.
- (16) Key, H. M.; Dydio, P.; Liu, Z.; Rha, J. Y.-E.; Nazarenko, A.; Seyedkazemi, V.; Clark, D. S.; Hartwig, J. F. Beyond iron: iridium-containing P450 enzymes for selective cyclopropanations of structurally diverse alkenes. *ACS Cent. Sci.* **2017**, *3*, 302–308.
- (17) Hoang, V. D. M.; Reddy, P. A. N.; Kim, T.-J. Highly enantioselective and *cis*-diastereoselective cyclopropanation of olefins catalyzed by ruthenium complexes of (iminophosphoranyl)ferrocenes. *Tetrahedron Lett.* **2007**, *48*, 8014–8017.

- (18) Chanthamath, S.; Iwasa, S. Enantioselective cyclopropanation of a wide variety of olefins catalyzed by Ru(II)–pheox complexes. *Acc. Chem. Res.* **2016**, *49*, 2080–2090.
- (19) Zhu, S.; Xu, X.; Perman, J. A.; Zhang, X. P. A general and efficient cobalt (II)-based catalytic system for highly stereoselective cyclopropanation of alkenes with  $\alpha$ -cyanodiazooacetates. *J. Am. Chem. Soc.* **2010**, *132*, 12796–12799.
- (20) Xu, X.; Wang, Y.; Cui, X.; Wojtas, L.; Zhang, X. P. Metalloradical activation of  $\alpha$ -formyldiazoacetates for the catalytic asymmetric radical cyclopropanation of alkenes. *Chem. Sci.* **2017**, *8*, 4347–4351.
- (21) Lo, M. M.-C.; Fu, G. C. A new class of planar–chiral ligands: synthesis of a  $C_2$ -symmetric bisazaferrocene and its application in the enantioselective Cu(I)-catalyzed cyclopropanation of olefins. *J. Am. Chem. Soc.* **1998**, *120*, 10270–10271.
- (22) Minuth, T.; Boysen, M. K. Carbohydrate-derived bis(oxazoline) ligand in the total synthesis of grenadamide. *Synthesis* **2010**, *16*, 2799–2803.
- (23) Wommack, A. J.; Moebius, D. C.; Travis, A. L.; Kingsbury, J. S. Diverse alkanones by catalytic carbon insertion into the formyl C–H Bond. Concise access to the natural precursor of achyrofuran. *Org. Lett.* **2009**, *11*, 3202–3205.
- (24) Bordeaux, M.; Tyagi, V.; Fasan, R. Highly diastereoselective and enantioselective olefin cyclopropanation using engineered myoglobin-based catalysts. *Angew. Chem. Int. Ed.* **2015**, *54*, 1744–1748.
- (25) Brandenberg, O. F.; Fasan, R.; Arnold, F. H. Exploiting and engineering hemoproteins for abiological carbene and nitrene transfer reactions. *Curr. Opin. Biotechnol.* **2017**, *47*, 102–111.
- (26) Biasini, M.; Bienert, S.; Waterhouse, A.; Arnold, K.; Studer, G.; Schmidt, T.; Kiefer, F.; Cassarino, T. G.; Bertoni, M.; Bordoli, L.; Schwede, T. SWISS-MODEL: modelling protein tertiary and quaternary structure using evolutionary information. *Nucleic Acids Res.* **2014**, *42*, W252–W258.
- (27) Gibson, D. G.; Young, L.; Chuang, R.-Y.; Venter, J. C.; Hutchison, C. A.; Smith, H. O. Enzymatic assembly of DNA molecules up to several hundred kilobases. *Nat. Methods* **2009**, *6*, 343–345.
- (28) Kille, S.; Acevedo-Rocha, C. G.; Parra, L. P.; Zhang, Z.-G. G.; Opperman, D. J.; Reetz, M. T.; Acevedo, J. P. Reducing codon redundancy and screening effort of combinatorial protein libraries created by saturation mutagenesis. *ACS Synth. Biol.* **2013**, *2*, 83–92.
- (29) Barr, I.; Guo, F. Pyridine hemochromagen assay for determining the concentration of heme in purified protein solutions. *Bio-protocol* **2015**, *5*, e1594.
- (30) Berry, E. A.; Trumpower, B. L. Simultaneous determination of hemes *a*, *b*, and *c* from pyridine hemochrome spectra. *Anal. Biochem.* **1987**, *161*, 1–15.
- (31) Tilleman, L.; Abbruzzetti, S.; Ciaccio, C.; De Sanctis, G.; Nardini, M.; Pesce, A.; Desmet, F.; Moens, L.; Van Doorslaer, S.; Bruno, S.; Bolognesi, M.; Ascenzi, P.; Coletta, M.; Viappiani, C.; Dewilde, S. Structural bases for the regulation of CO Binding in the archaeal protoglobin from *Methanosarcina acetivorans*. *PLoS One* **2015**, *10*, e0125959.
- (32) Freitas, T. A. K.; Hou, S.; Dioum, E. M.; Saito, J. A.; Newhouse, J.; Gonzalez, G.; Gilles-Gonzalez, M.-A.; Alam, M. Ancestral hemoglobins in archaea. *Proc. Natl. Acad. Sci. U.S.A.* **2004**, *101*, 6675–6680.
- (33) Wang, Z. J.; Renata, H.; Peck, N. E.; Farwell, C. C.; Coelho, P. S.; Arnold, F. H. Improved cyclopropanation activity of histidine-ligated cytochrome P450 enables the enantioselective formal synthesis of levomilnacipran. *Angew. Chem. Int. Ed.* **2014**, *53*, 6810–6813.
- (34) Coelho, P. S.; Wang, Z. J.; Ener, M. E.; Baril, S. A.; Kannan, A.; Arnold, F. H.; Brustad, E. M. A serine-substituted P450 catalyzes highly efficient carbene transfer to olefins *in vivo*. *Nat. Chem. Biol.* **2013**, *9*, 485–487.
- (35) Kan, S. B. J.; Huang, X.; Gumulya, Y.; Chen, K.; Arnold, F. H. Genetically programmed

chiral organoborane synthesis. *Nature* **2017**, *552*, 132–136.

(36) Renata, H.; Lewis, R. D.; Sweredoski, M. J.; Moradian, A.; Hess, S.; Wang, Z. J.; Arnold, F. H. Identification of mechanism-based inactivation in P450-catalyzed cyclopropanation facilitates engineering of improved enzymes. *J. Am. Chem. Soc.* **2016**, *138*, 12527–12533.

(37) Heslinga, L.; van Der Linde, R.; Pabon, H. J. J.; van Dorp, D. A. Synthesis of substituted *cis*-8, *cis*-11, *cis*-14-eicosatrienoic acids, precursors of correspondingly substituted prostaglandins. *Recl. Trav. Chim. Pays-Bas* **1975**, *94*, 262–273.

(38) Barrett, A. G. M.; Braddock, D. C.; Lenoir, I.; Tone, H. 5,10,15,20-Tetraphenylporphyrinato-rhodium(III) iodide catalyzed cyclopropanation reactions of alkenes using glycine ester hydrochloride. *J. Org. Chem.* **2001**, *66*, 8260–8263.

(39) Chen, Y.; Ruppel, J. V.; Zhang, X. P. Cobalt-catalyzed asymmetric cyclopropanation of electron-deficient olefins. *J. Am. Chem. Soc.* **2007**, *129*, 12074–12075.

(40) Maier, G.; Sayrac, T. Über das 3.4-Diaza-Norcaradien und dessen alkylsubstituierte Derivate. *Chem. Ber.* **1968**, *101*, 1354–1370.

(41) Davi, M.; Lebel, H. One-pot approach for the synthesis of *trans*-cyclopropyl compounds from aldehydes. Application to the synthesis of GPR40 receptor agonists. *Chem. Commun.* **2008**, *40*, 4974–4976.

(42) Kirmse, W.; van Chiem, P.; Henning, P.-G. The diazo route to 2-vinylcyclopropylidenes. *Tetrahedron* **1985**, *41*, 1441–1451.
